# Supplementary material for: Genetic screens for the control of influenza virus replication: from meta-analysis to drug discovery
Source: Royal Society of Chemistry journal article supplement (doi:10.1039/c2mb05416g), 2012-02-03

## Supplementary File 1

For each pair of data sets is shown the statistical analysis of their overlap :

- the number of genes tested and identified in each data set
- the number and the list of overlapping genes between the two datasets
- the pvalue and the distribution of overlap sizes obtained by random simulation. For each data set, the same number of genes as identified were randomly drawn from a background simulating the set of genes tested. The overlap size was collected, and the procedure repeated 1,000 times. The 1,000 overlap sizes were plotted. The observed value of overlap size is indicated by the vertical arrow, and its significance is given.

## Contents

|                                        |    |
|----------------------------------------|----|
| 1. FLUAV_Brass vs. FLUAV_Konig.....    | 4  |
| 2. FLUAV_Shapira vs. FLUAV_Konig.....  | 8  |
| 3. FLUAV_Hao vs. FLUAV_Konig.....      | 9  |
| 4. FLUAV_Sui vs. FLUAV_Konig.....      | 10 |
| 5. FLUAV_Karlas vs. FLUAV_Konig.....   | 10 |
| 6. HIV_Brass vs. FLUAV_Konig.....      | 11 |
| 7. HIV_Konig vs. FLUAV_Konig.....      | 11 |
| 8. WNV_Krishnan vs. FLUAV_Konig.....   | 12 |
| 9. HCV_Li vs. FLUAV_Konig.....         | 12 |
| 10. DV_Sessions vs. FLUAV_Konig.....   | 13 |
| 11. HCV_Tai vs. FLUAV_Konig.....       | 13 |
| 12. HIV_Zhou vs. FLUAV_Konig.....      | 14 |
| 13. FLUAV_Shapira vs. FLUAV_Brass..... | 14 |
| 14. FLUAV_Hao vs. FLUAV_Brass.....     | 15 |
| 15. FLUAV_Sui vs. FLUAV_Brass.....     | 15 |
| 16. FLUAV_Karlas vs. FLUAV_Brass.....  | 16 |
| 17. HIV_Brass vs. FLUAV_Brass.....     | 16 |
| 18. HIV_Konig vs. FLUAV_Brass.....     | 17 |
| 19. WNV_Krishnan vs. FLUAV_Brass.....  | 17 |
| 20. HCV_Li vs. FLUAV_Brass.....        | 18 |
| 21. DV_Sessions vs. FLUAV_Brass.....   | 18 |

|                                         |    |
|-----------------------------------------|----|
| 22. HCV_Tai vs. FLUAV_Brass.....        | 19 |
| 23. HIV_Zhou vs. FLUAV_Brass.....       | 19 |
| 24. FLUAV_Hao vs. FLUAV_Shapira.....    | 20 |
| 25. FLUAV_Sui vs. FLUAV_Shapira.....    | 20 |
| 26. FLUAV_Karlas vs. FLUAV_Shapira..... | 21 |
| 27. HIV_Brass vs. FLUAV_Shapira.....    | 21 |
| 28. HIV_Konig vs. FLUAV_Shapira.....    | 22 |
| 29. WNV_Krishnan vs. FLUAV_Shapira..... | 22 |
| 30. HCV_Li vs. FLUAV_Shapira.....       | 23 |
| 31. DV_Sessions vs. FLUAV_Shapira.....  | 23 |
| 32. HCV_Tai vs. FLUAV_Shapira.....      | 24 |
| 33. HIV_Zhou vs. FLUAV_Shapira.....     | 24 |
| 34. FLUAV_Sui vs. FLUAV_Hao.....        | 25 |
| 35. FLUAV_Karlas vs. FLUAV_Hao.....     | 25 |
| 36. HIV_Brass vs. FLUAV_Hao.....        | 26 |
| 37. HIV_Konig vs. FLUAV_Hao.....        | 26 |
| 38. WNV_Krishnan vs. FLUAV_Hao.....     | 27 |
| 39. HCV_Li vs. FLUAV_Hao.....           | 27 |
| 40. DV_Sessions vs. FLUAV_Hao.....      | 28 |
| 41. HCV_Tai vs. FLUAV_Hao.....          | 28 |
| 42. HIV_Zhou vs. FLUAV_Hao.....         | 29 |
| 43. FLUAV_Karlas vs. FLUAV_Sui.....     | 29 |
| 44. HIV_Brass vs. FLUAV_Sui.....        | 30 |
| 45. HIV_Konig vs. FLUAV_Sui.....        | 30 |
| 46. WNV_Krishnan vs. FLUAV_Sui.....     | 31 |
| 47. HCV_Li vs. FLUAV_Sui.....           | 31 |
| 48. DV_Sessions vs. FLUAV_Sui.....      | 32 |
| 49. HCV_Tai vs. FLUAV_Sui.....          | 32 |
| 50. HIV_Zhou vs. FLUAV_Sui.....         | 33 |
| 51. HIV_Brass vs. FLUAV_Karlas.....     | 33 |
| 52. HIV_Konig vs. FLUAV_Karlas.....     | 34 |
| 53. WNV_Krishnan vs. FLUAV_Karlas.....  | 34 |
| 54. HCV_Li vs. FLUAV_Karlas.....        | 35 |
| 55. DV_Sessions vs. FLUAV_Karlas.....   | 35 |
| 56. HCV_Tai vs. FLUAV_Karlas.....       | 36 |
| 57. HIV_Zhou vs. FLUAV_Karlas.....      | 36 |

|                                                  |    |
|--------------------------------------------------|----|
| 58. HIV_Konig vs. HIV_Brass.....                 | 37 |
| 59. WNV_Krishnan vs. HIV_Brass.....              | 37 |
| 60. HCV_Li vs. HIV_Brass.....                    | 38 |
| 61. DV_Sessions vs. HIV_Brass.....               | 38 |
| 62. HCV_Tai vs. HIV_Brass.....                   | 39 |
| 63. HIV_Zhou vs. HIV_Brass.....                  | 39 |
| 64. WNV_Krishnan vs. HIV_Konig.....              | 40 |
| 65. HCV_Li vs. HIV_Konig.....                    | 40 |
| 66. DV_Sessions vs. HIV_Konig.....               | 41 |
| 67. HCV_Tai vs. HIV_Konig.....                   | 41 |
| 68. HIV_Zhou vs. HIV_Konig.....                  | 42 |
| 69. HCV_Li vs. WNV_Krishnan.....                 | 42 |
| 70. DV_Sessions vs. WNV_Krishnan.....            | 43 |
| 71. HCV_Tai vs. WNV_Krishnan.....                | 43 |
| 72. HIV_Zhou vs. WNV_Krishnan.....               | 44 |
| 73. DV_Sessions vs. HCV_Li.....                  | 44 |
| 74. HCV_Tai vs. HCV_Li.....                      | 45 |
| 75. HIV_Zhou vs. HCV_Li.....                     | 45 |
| 76. HCV_Tai vs. DV_Sessions.....                 | 46 |
| 77. HIV_Zhou vs. DV_Sessions.....                | 46 |
| 78. HIV_Zhou vs. HCV_Tai.....                    | 47 |
| 79. FLUAV_interactors vs. FLUAV_Konig.....       | 47 |
| 80. FLUAV_interactors vs. FLUAV_Brass.....       | 48 |
| 81. FLUAV_interactors vs. FLUAV_Shapira.....     | 48 |
| 82. FLUAV_interactors vs. FLUAV_Hao.....         | 49 |
| 83. FLUAV_interactors vs. FLUAV_Sui.....         | 49 |
| 84. FLUAV_interactors vs. FLUAV_Karlas.....      | 50 |
| 85. FLUAV_interactors vs. HIV_Brass.....         | 50 |
| 86. FLUAV_interactors vs. HIV_Konig.....         | 51 |
| 87. FLUAV_interactors vs. WNV_Krishnan.....      | 51 |
| 88. FLUAV_interactors vs. HCV_Li.....            | 52 |
| 89. FLUAV_interactors vs. DV_Sessions.....       | 52 |
| 90. FLUAV_interactors vs. HCV_Tai.....           | 53 |
| 91. FLUAV_interactors vs. HIV_Zhou.....          | 53 |
| 92. FLUAV_interactors vs. FLUAV_all_screens..... | 54 |
| 93. FLUAV_interactors vs. HIV_all_screens.....   | 54 |

|                                                |    |
|------------------------------------------------|----|
| 94. FLUAV_interactors vs. HCV_all_screens..... | 55 |
| 95. FLUAV_interactors vs. WNV_all_screens..... | 55 |
| 96. FLUAV_interactors vs. DV_all_screens.....  | 56 |

## 1. FLUAV\_Brass vs. FLUAV\_Konig

FLUAV\_Brass: 17877 genes tested, 133 genes identified

FLUAV\_Konig: 19628 genes tested, 295 genes identified

Number of overlapping genes: 9

List of overlapping genes: ARCN1, ATP6V0B, ATP6AP1, COPA, NHP2L1, COPB2, TRIM28, COPG, WDR18

Number of simulations showing 9 or more overlapping genes: 0/1000

P-value: < 0,001

Random distribution:

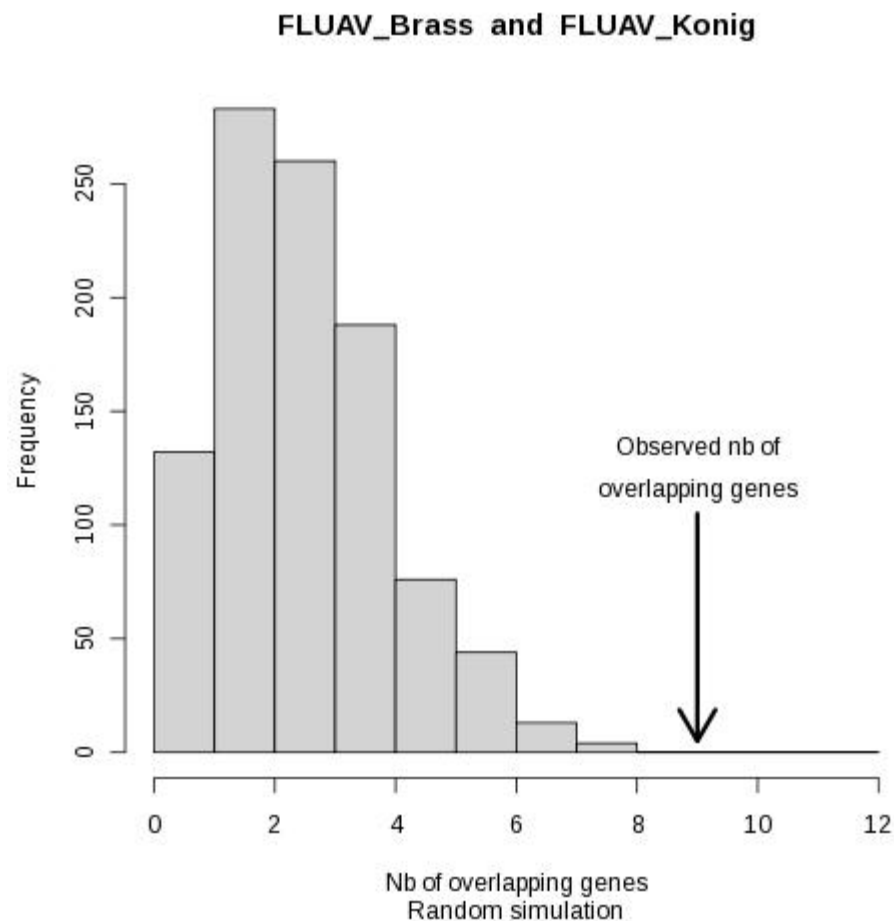

## 2. FLUAV\_Shapira vs. FLUAV\_Konig

FLUAV\_Shapira: 1745 genes tested, 242 genes identified

FLUAV\_Konig: 19628 genes tested, 295 genes identified

Number of overlapping genes: 6

List of overlapping genes: COPA, FGFR2, MAP2K3, RBCK1, EPHB2, PIK3R4

Number of simulations showing 6 or more overlapping genes: 153/1000

P-value: 0,153

Random distribution:

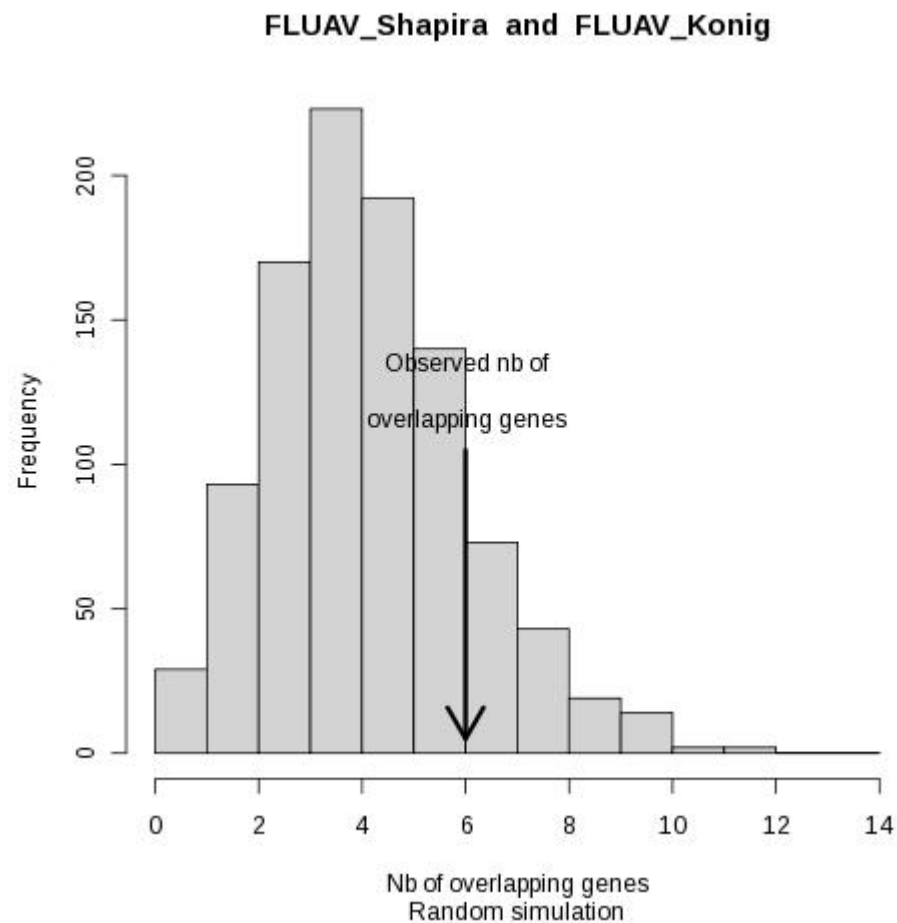

### 3. *FLUAV\_Hao* vs. *FLUAV\_Konig*

*FLUAV\_Hao*: 10278 genes tested, 78 genes identified

*FLUAV\_Konig*: 19628 genes tested, 295 genes identified

Number of overlapping genes: 7

List of overlapping genes: *ARCN1*, *ATP6V0C*, *RPS10*, *RPS20*, *ATP6V0D1*, *HAND2*, *COPG*

Number of simulations showing 7 or more overlapping genes: 1/1000

P-value: 0,001

Random distribution:

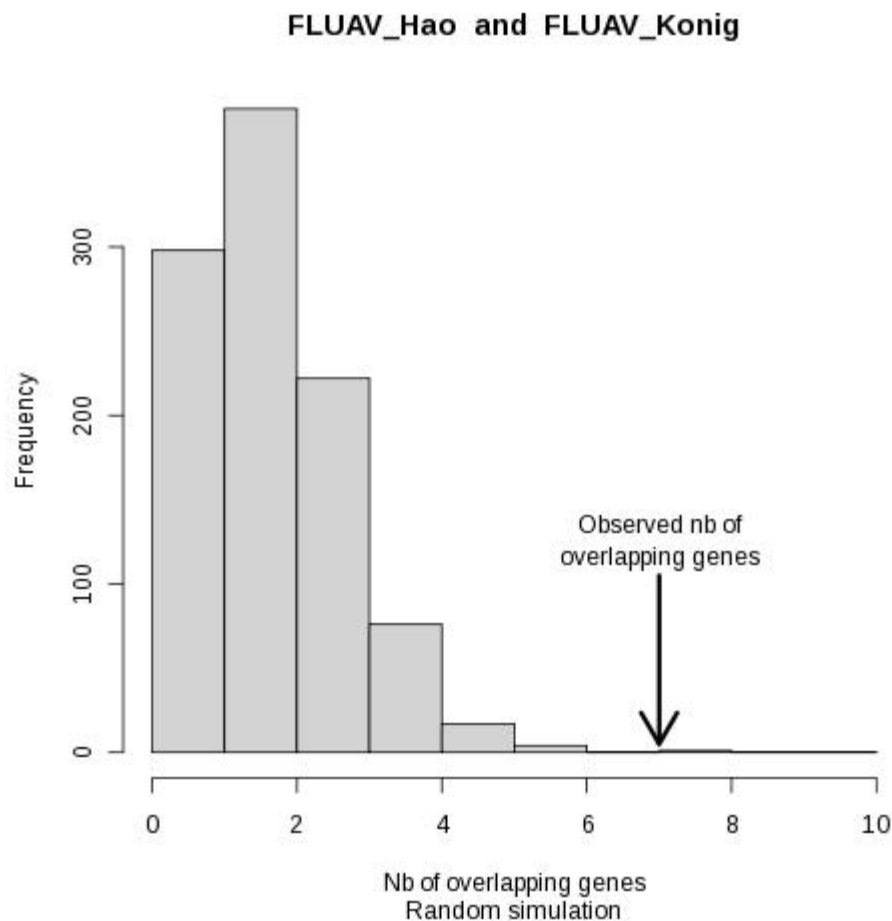

### 4. *FLUAV\_Sui* vs. *FLUAV\_Konig*

*FLUAV\_Sui*: 25157 genes tested, 99 genes identified

*FLUAV\_Konig*: 19628 genes tested, 295 genes identified

Number of overlapping genes: 2

List of overlapping genes: *AKT1*, *GRK6*

Number of simulations showing 2 or more overlapping genes: 315/1000

P-value: 0,315

Random distribution:

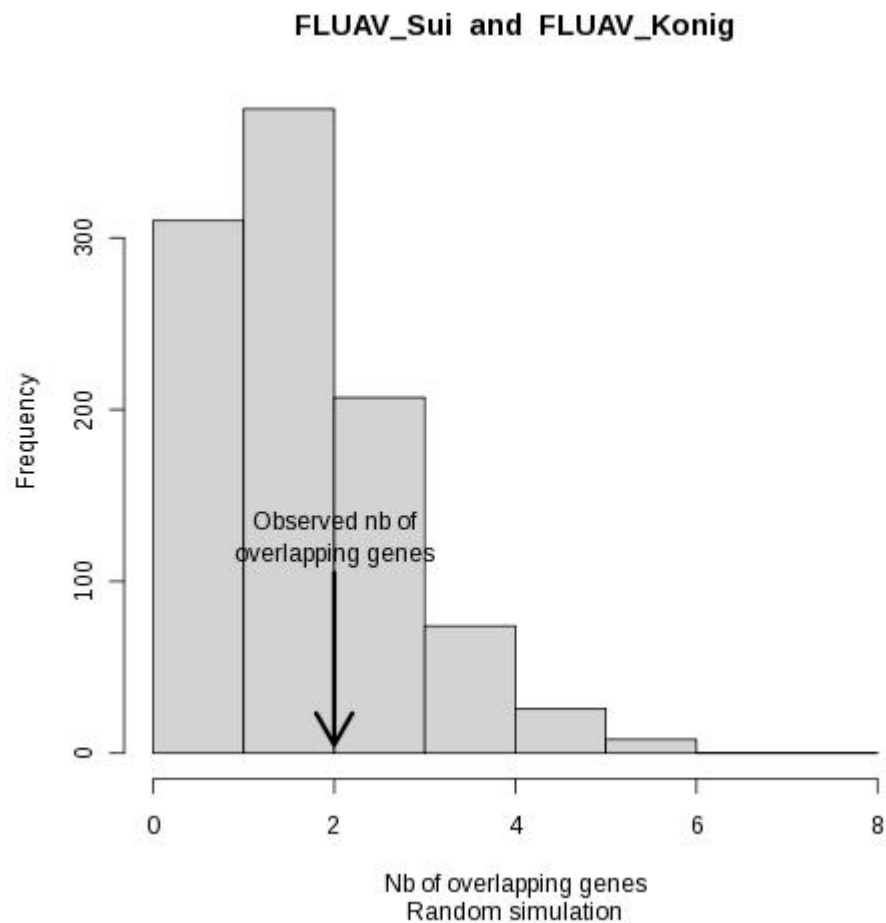

## 5. FLUAV\_Karlas vs. FLUAV\_Konig

FLUAV\_Karlas: 22843 genes tested, 168 genes identified

FLUAV\_Konig: 19628 genes tested, 295 genes identified

Number of overlapping genes: 27

List of overlapping genes: ATP6V1A, ATP6V1B2, ATP6VOC, ATP6AP1, CD81, CLK1, PLK3, COPA, JUN, KPNB1, PHF2, PTPRN, RPS10, SNRP70, ATP6VOD1, BZRAP1, COPB2, ATP6AP2, TNK2, SIGMAR1, SF3A1, COPG, IL17RA, RACGAP1, PPP1R14D, PSENE1, DCLK2

Number of simulations showing 27 or more overlapping genes: 0/1000

P-value: < 0,001

Random distribution:

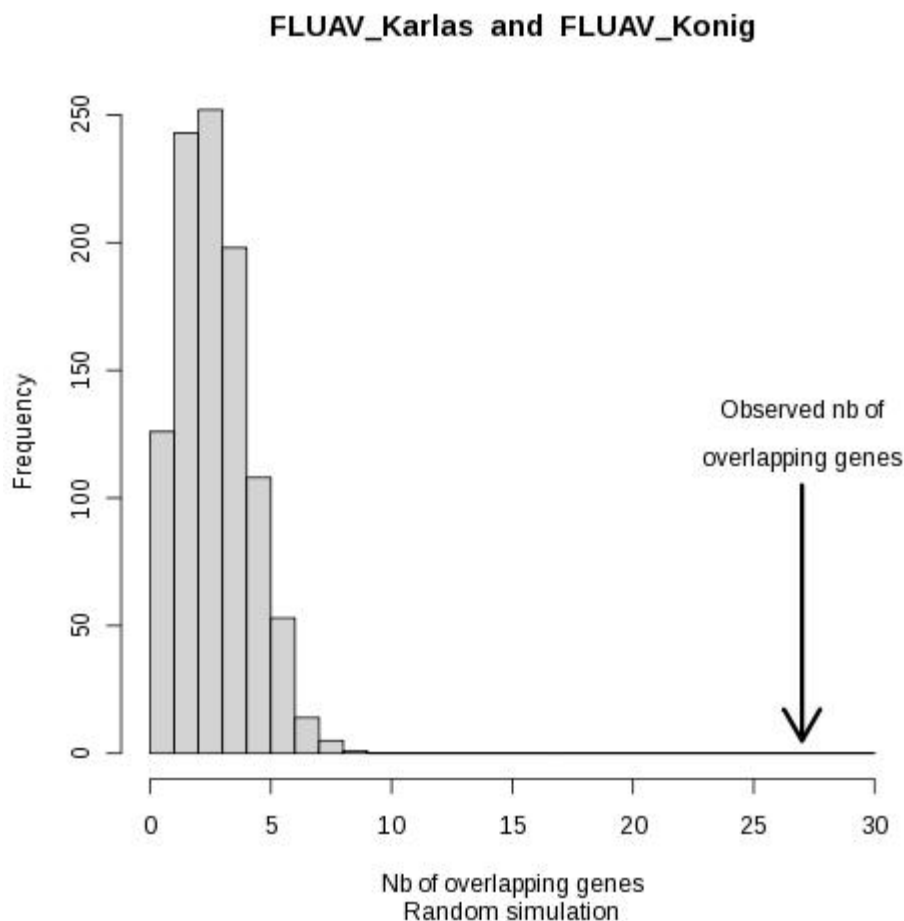

## 6. HIV\_Brass vs. FLUAV\_Konig

HIV\_Brass: 21121 genes tested, 280 genes identified

FLUAV\_Konig: 19628 genes tested, 295 genes identified

Number of overlapping genes: 10

List of overlapping genes: XIAP, NUP98, SNRPD3, AQR, NXF1, SLU7, PRPF8, SF3B2, SF3B1, SAMM50

Number of simulations showing 10 or more overlapping genes: 7/1000

P-value: 0,007

Random distribution:

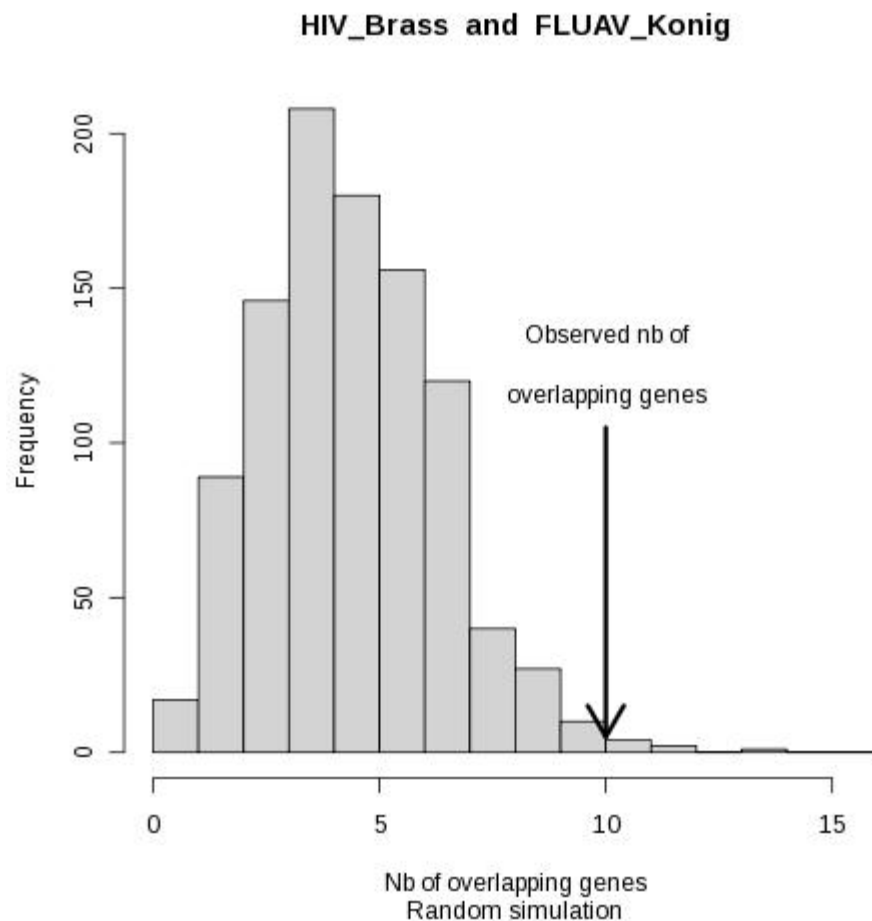

## 7. HIV\_Konig vs. FLUAV\_Konig

HIV\_Konig: 19628 genes tested, 295 genes identified  
FLUAV\_Konig: 19628 genes tested, 295 genes identified  
Number of overlapping genes: 23  
List of overlapping genes: ATP6V0C, CAD, KCNJ11, KPNB1, PHF2, SUMO2, SNRPA1, NUP214, CLOCK, NUP153, CHAF1A, RBM5, SF3A1, AKAP13, TNPO3, ANAPC2, PPP1R12C, PPP1R14D, USE1, IL1F9, MID1IP1, OSBPL6, CANT1  
Number of simulations showing 23 or more overlapping genes: 0/1000  
P-value: < 0,001  
Random distribution:

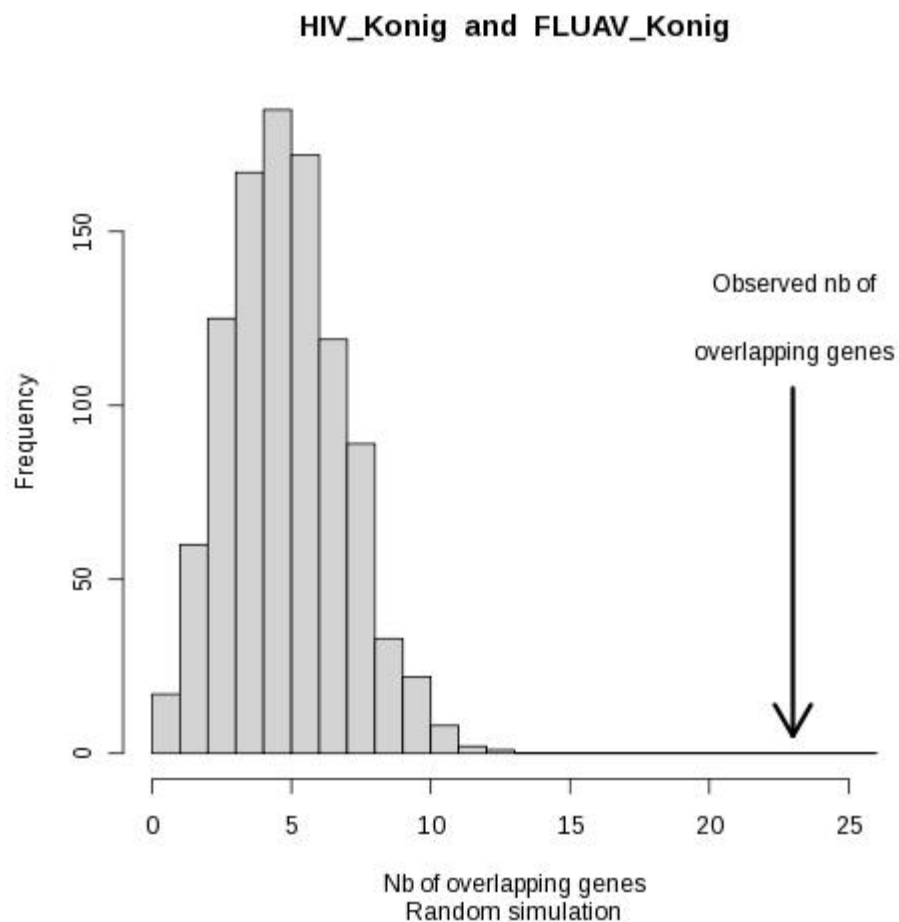

## 8. WNV\_Krishnan vs. FLUAV\_Konig

WNV\_Krishnan: 21121 genes tested, 305 genes identified  
FLUAV\_Konig: 19628 genes tested, 295 genes identified  
Number of overlapping genes: 21  
List of overlapping genes: ATP6V1A, ATP6V1B2, ATP6V0C, ATP6V0B, ATP6AP1, CLK1, GRK6, TEAD3, ATP6V0D1, RBM5, TUBB3, PLK4, STK39, TRPV2, STK31, WDR18-, MID1IP1, CBLL1, WDR34, UBXN10, ACRC  
Number of simulations showing 21 or more overlapping genes: 0/1000  
P-value: < 0,001  
Random distribution:

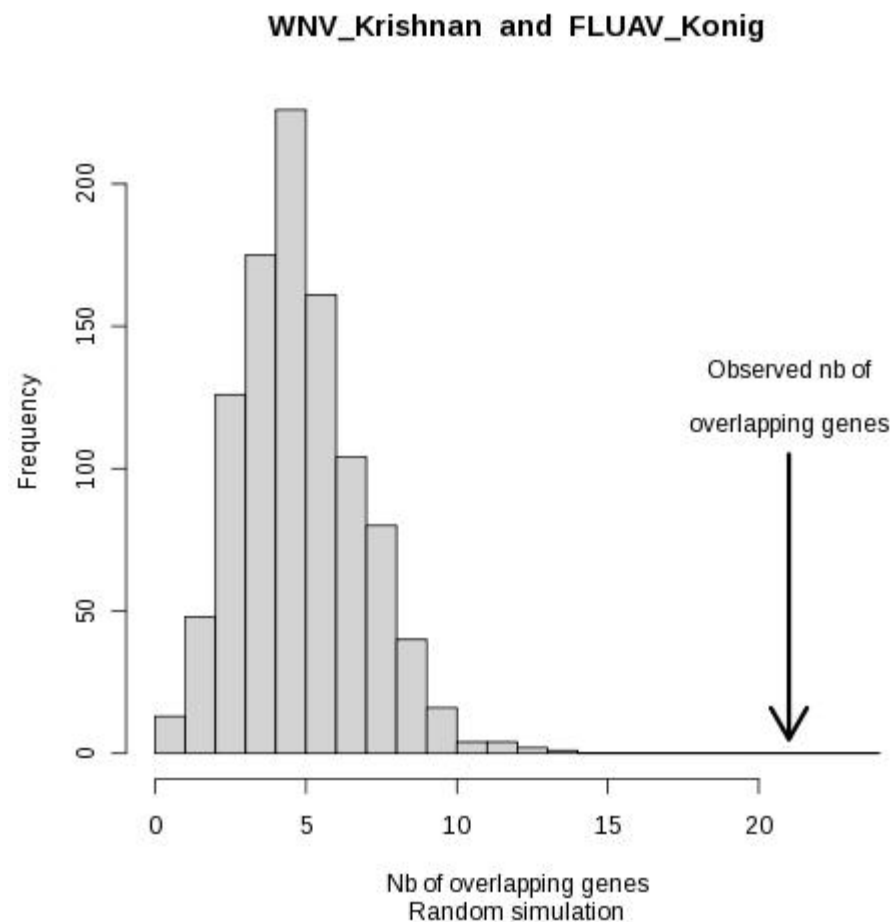



## 9. HCV\_Li vs. FLUAV\_Konig

HCV\_Li: 19470 genes tested, 262 genes identified

FLUAV\_Konig: 19628 genes tested, 295 genes identified

Number of overlapping genes: 7

List of overlapping genes: FLT4, KCNJ3, MAPK1, SMARCD3, CDKL5, HIPK3, APC2

Number of simulations showing 7 or more overlapping genes: 109/1000

P-value: 0,109

Random distribution:

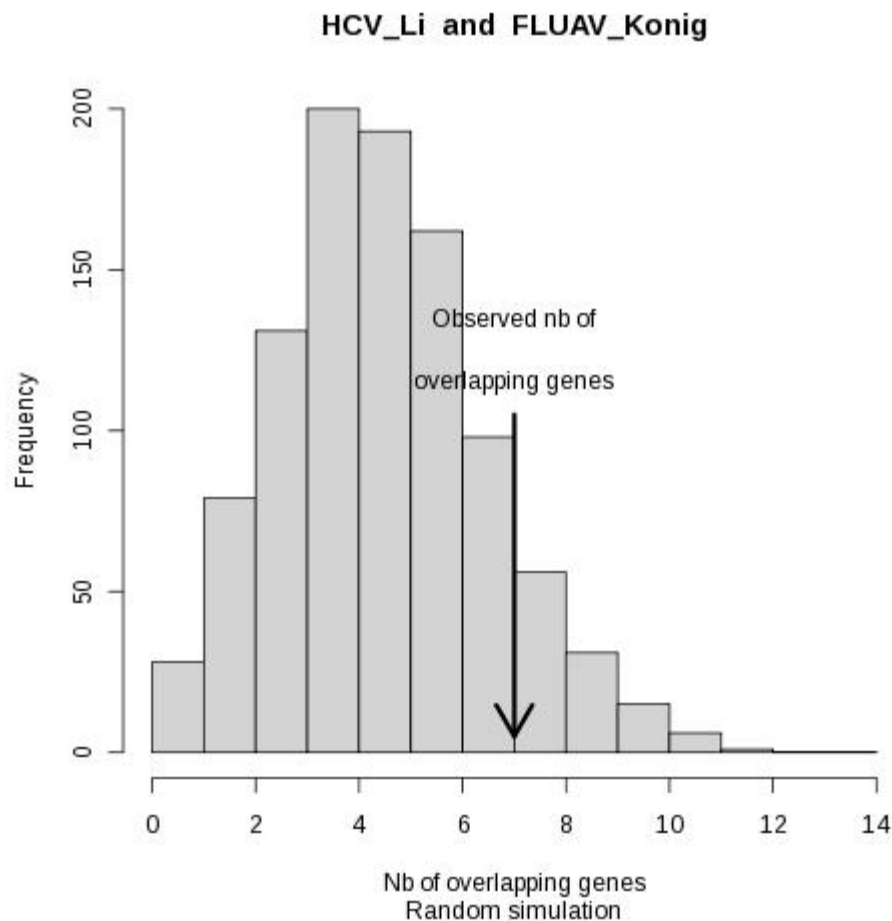

## 10. DV\_Sessions vs. FLUAV\_Konig

DV\_Sessions: 10278 genes tested, 81 genes identified

FLUAV\_Konig: 19628 genes tested, 295 genes identified

Number of overlapping genes: 3

List of overlapping genes: ATP6V0B, PHF2, ATP6V0D1

Number of simulations showing 3 or more overlapping genes: 116/1000

P-value: 0,116

Random distribution:

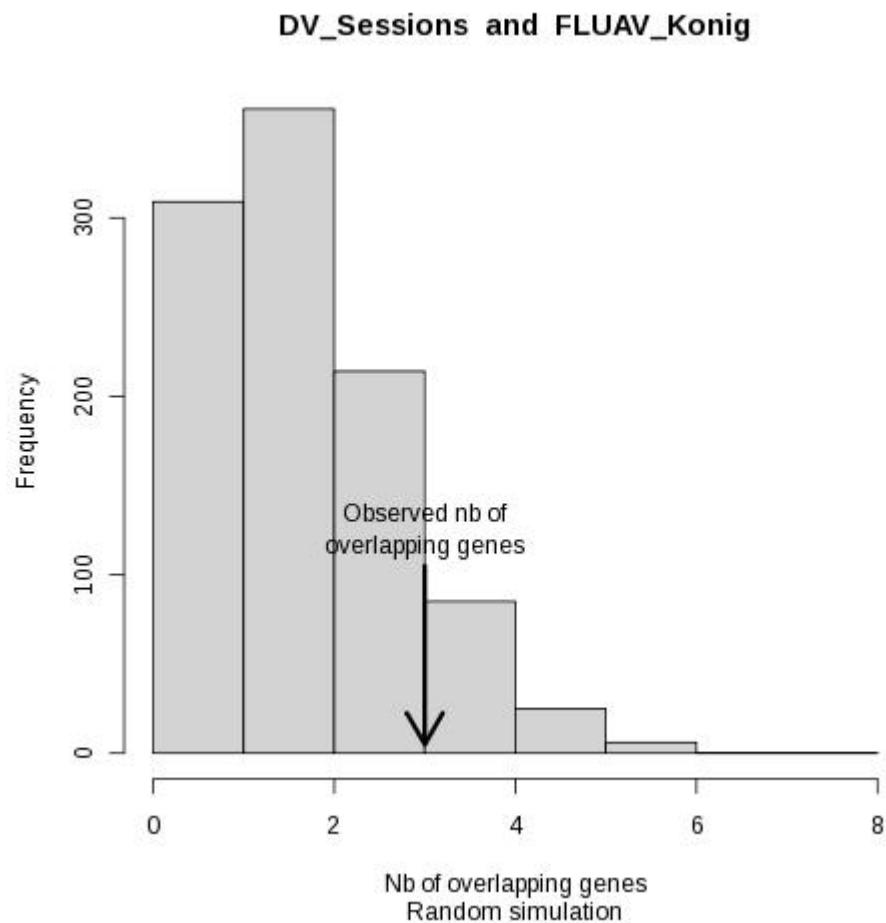

## 11. HCV\_Tai vs. FLUAV\_Konig

HCV\_Tai: 21094 genes tested, 95 genes identified

FLUAV\_Konig: 19628 genes tested, 295 genes identified

Number of overlapping genes: 6

List of overlapping genes: ARCN1, COPA, PSMD1, COPB2, COPG, TBK1

Number of simulations showing 6 or more overlapping genes: 1/1000

P-value: < 0,001

Random distribution:

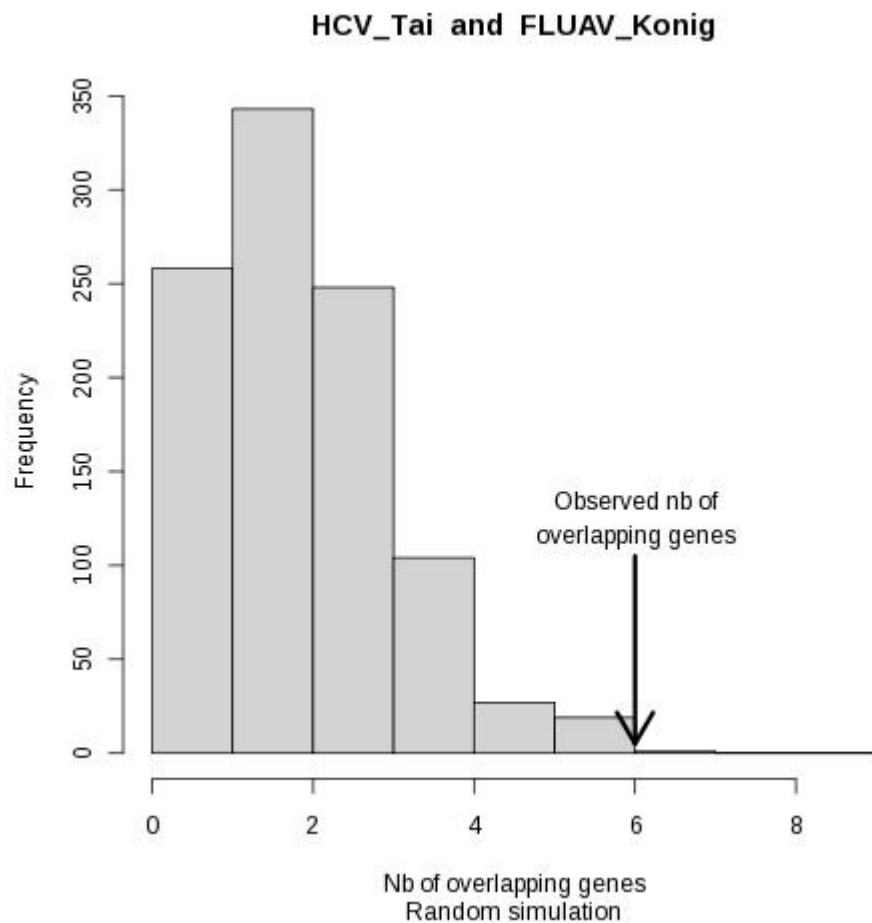

## 12. HIV\_Zhou vs. FLUAV\_Konig

HIV\_Zhou: 20000 genes tested, 206 genes identified

FLUAV\_Konig: 19628 genes tested, 295 genes identified

Number of overlapping genes: 6

List of overlapping genes: AKT1, TPT1, ERN2, DAPK2, ANAPC2, NRBP1

Number of simulations showing 6 or more overlapping genes: 67/1000

P-value: 0,067

Random distribution:

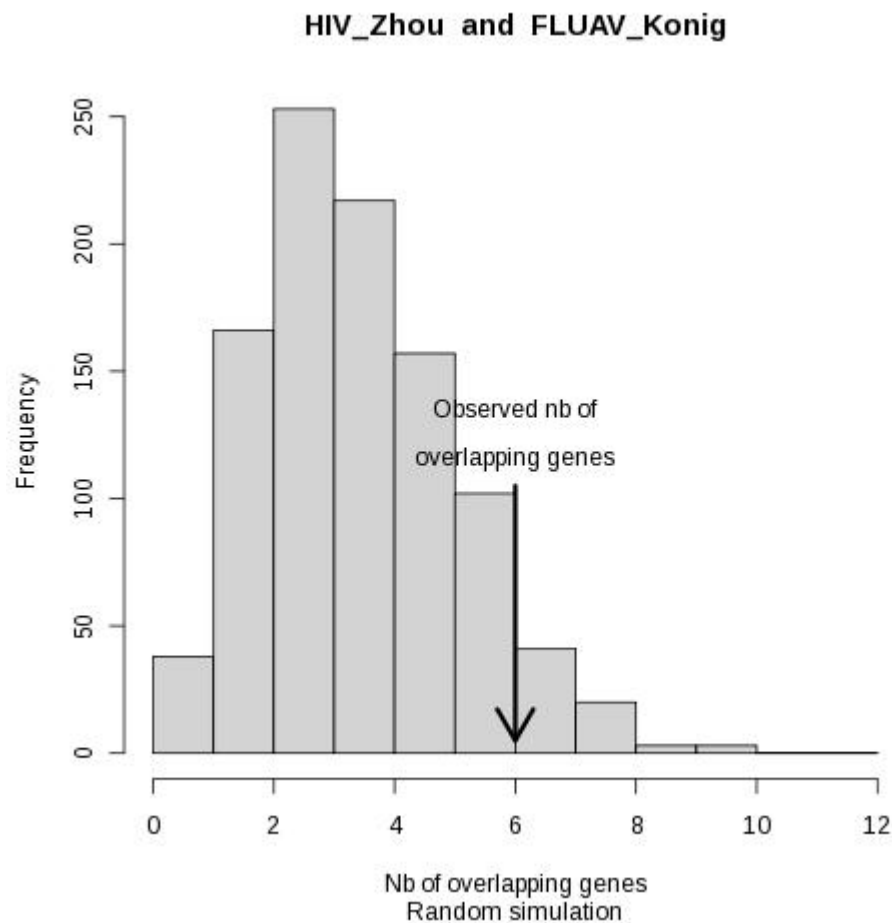

### 13. *FLUAV\_Shapira* vs. *FLUAV\_Brass*

*FLUAV\_Shapira*: 1745 genes tested, 242 genes identified

*FLUAV\_Brass*: 17877 genes tested, 133 genes identified

Number of overlapping genes: 7

List of overlapping genes: COPA, PGD, SLC1A3, CALCOCO2, NXF1, STARD5, IFITM3

Number of simulations showing 7 or more overlapping genes: 2/1000

P-value: 0,002

Random distribution:

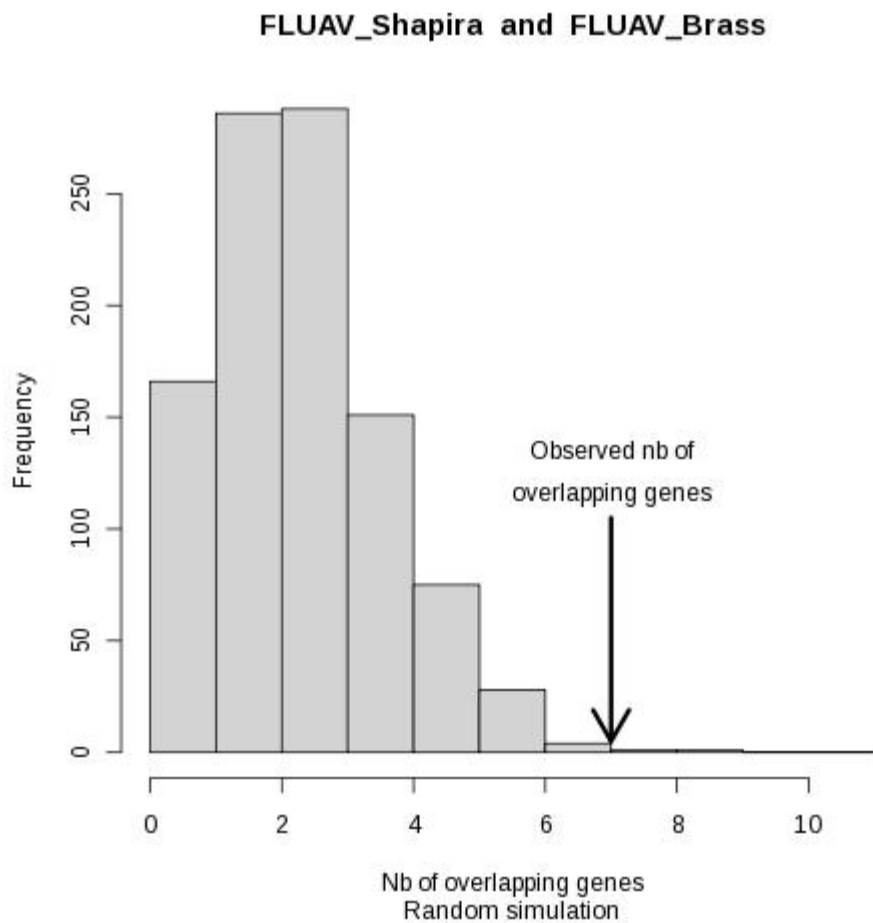

### 14. *FLUAV\_Hao* vs. *FLUAV\_Brass*

*FLUAV\_Hao*: 10278 genes tested, 78 genes identified

*FLUAV\_Brass*: 17877 genes tested, 133 genes identified

Number of overlapping genes: 7

List of overlapping genes: ARCN1, NUP98, PGD, RAB5A, NXF1, COPG, AQR

Number of simulations showing 7 or more overlapping genes: 0/1000

P-value: < 0,001

Random distribution:

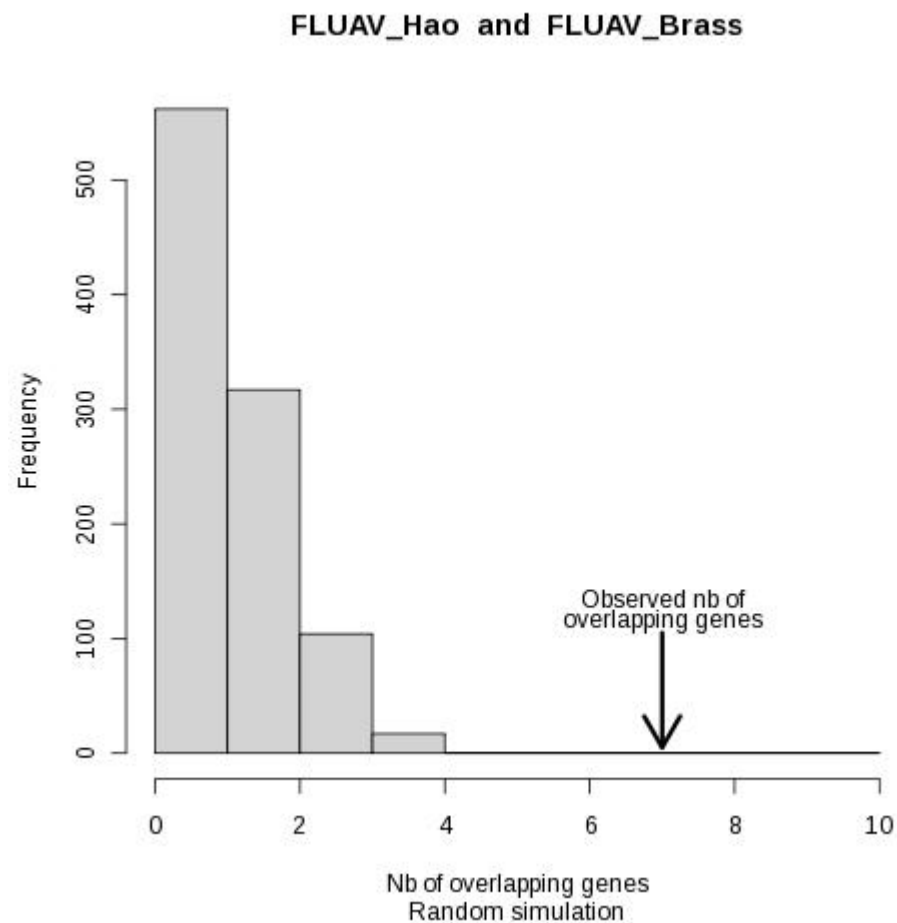

### 15. *FLUAV\_Sui* vs. *FLUAV\_Brass*

FLUAV\_Sui: 25157 genes tested, 99 genes identified  
FLUAV\_Brass: 17877 genes tested, 133 genes identified  
Number of overlapping genes: 0  
List of overlapping genes: none  
Number of simulations showing 0 or more overlapping genes: 1000/1000  
P-value: 1  
Random distribution:

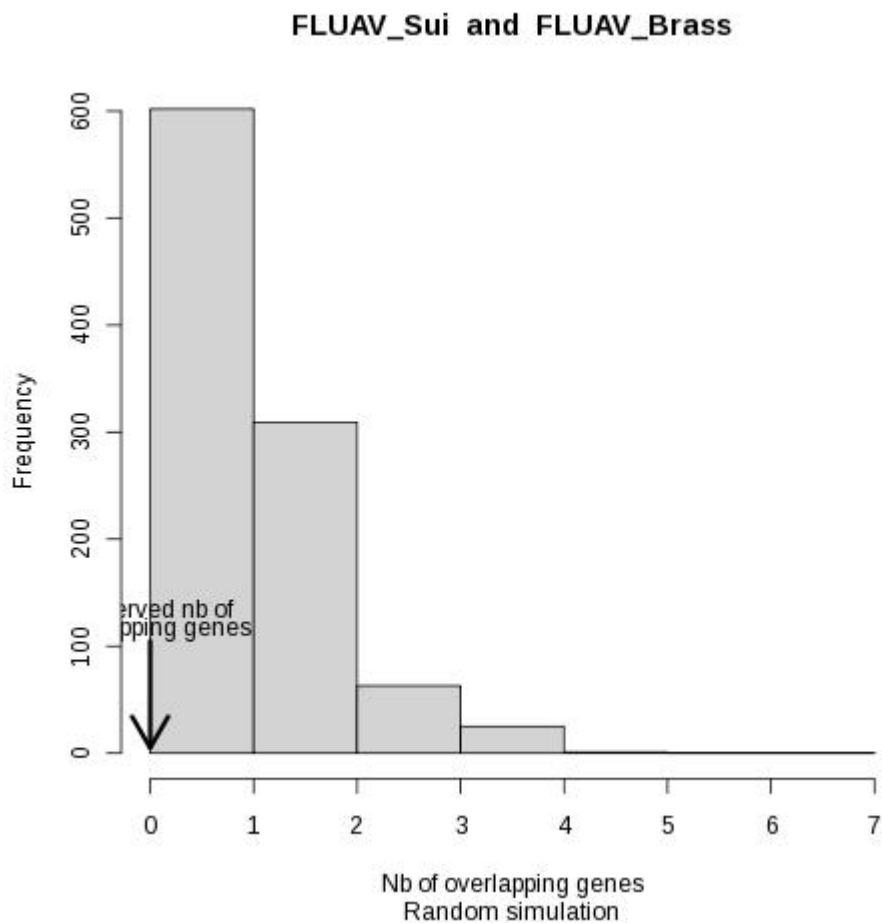

### 16. *FLUAV\_Karlas* vs. *FLUAV\_Brass*

FLUAV\_Karlas: 22843 genes tested, 168 genes identified  
FLUAV\_Brass: 17877 genes tested, 133 genes identified  
Number of overlapping genes: 9  
List of overlapping genes: ATP6AP1, COPA, COPB1, NUP98, COPB2, NXF1, PRPF8, COPI, SF3B1  
Number of simulations showing 9 or more overlapping genes: 0/1000  
P-value: < 0,001  
Random distribution:

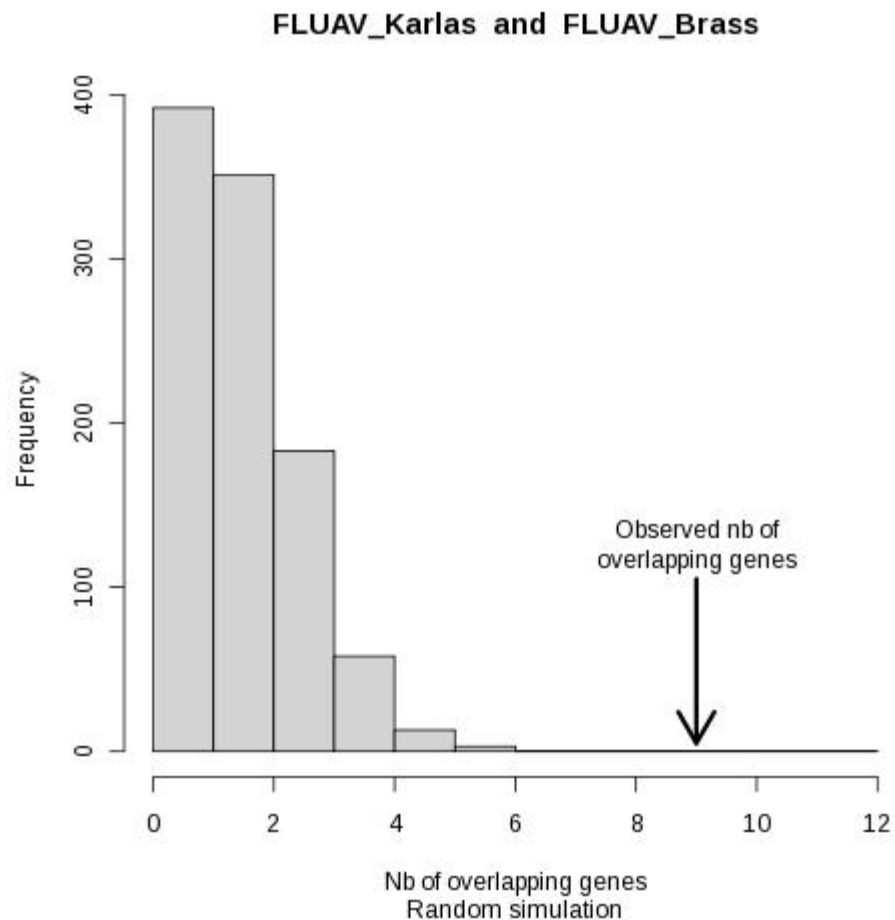

## 17. HIV\_Brass vs. FLUAV\_Brass

HIV\_Brass: 21121 genes tested, 280 genes identified  
FLUAV\_Brass: 17877 genes tested, 133 genes identified  
Number of overlapping genes: 1  
List of overlapping genes: NUP107  
Number of simulations showing 1 or more overlapping genes: 820/1000  
P-value: 0,820  
Random distribution:

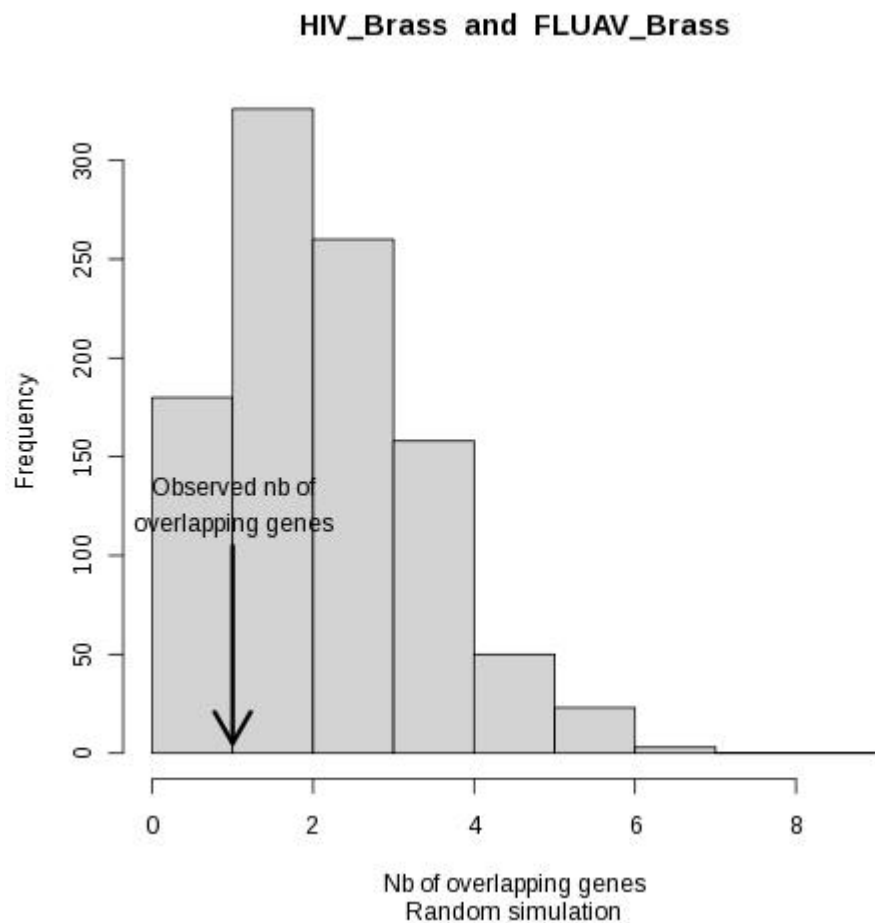

## 18. HIV\_Konig vs. FLUAV\_Brass

HIV\_Konig: 19628 genes tested, 295 genes identified  
FLUAV\_Brass: 17877 genes tested, 133 genes identified  
Number of overlapping genes: 10  
List of overlapping genes: AKT1, CAPN6, STX5, NUP153, PIP5K1C, TNPO3, UBQLN4, TAOK1, MID1IP1, ZNF436  
Number of simulations showing 10 or more overlapping genes: 0/1000  
P-value: < 0,001  
Random distribution:

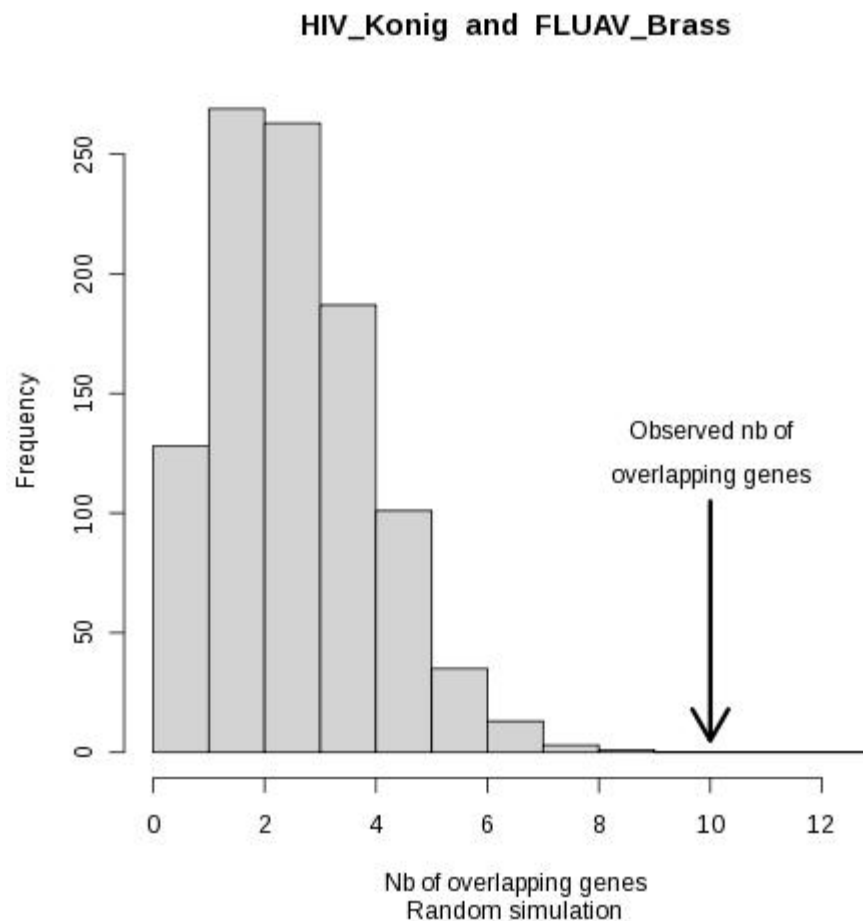

## 19. WNV\_Krishnan vs. FLUAV\_Brass

WNV\_Krishnan: 21121 genes tested, 305 genes identified  
FLUAV\_Brass: 17877 genes tested, 133 genes identified  
Number of overlapping genes: 4  
List of overlapping genes: ATP6V0B, ATP6AP1, WDR18, SFXN2  
Number of simulations showing 4 or more overlapping genes: 135/1000  
P-value: 0,135  
Random distribution:

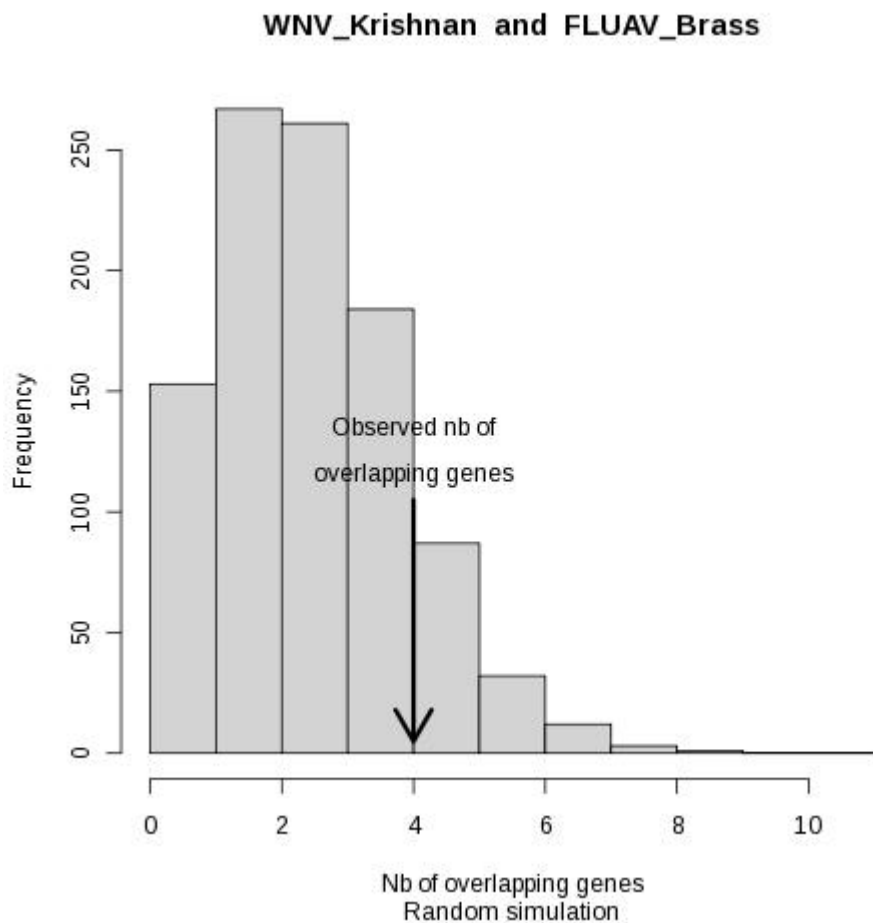

## 20. HCV\_Li vs. FLUAV\_Brass

HCV\_Li: 19470 genes tested, 262 genes identified  
FLUAV\_Brass: 17877 genes tested, 133 genes identified  
Number of overlapping genes: 3  
List of overlapping genes: PRPF31, CADM2, IFITM3  
Number of simulations showing 3 or more overlapping genes: 268/1000  
P-value: 0,268  
Random distribution:

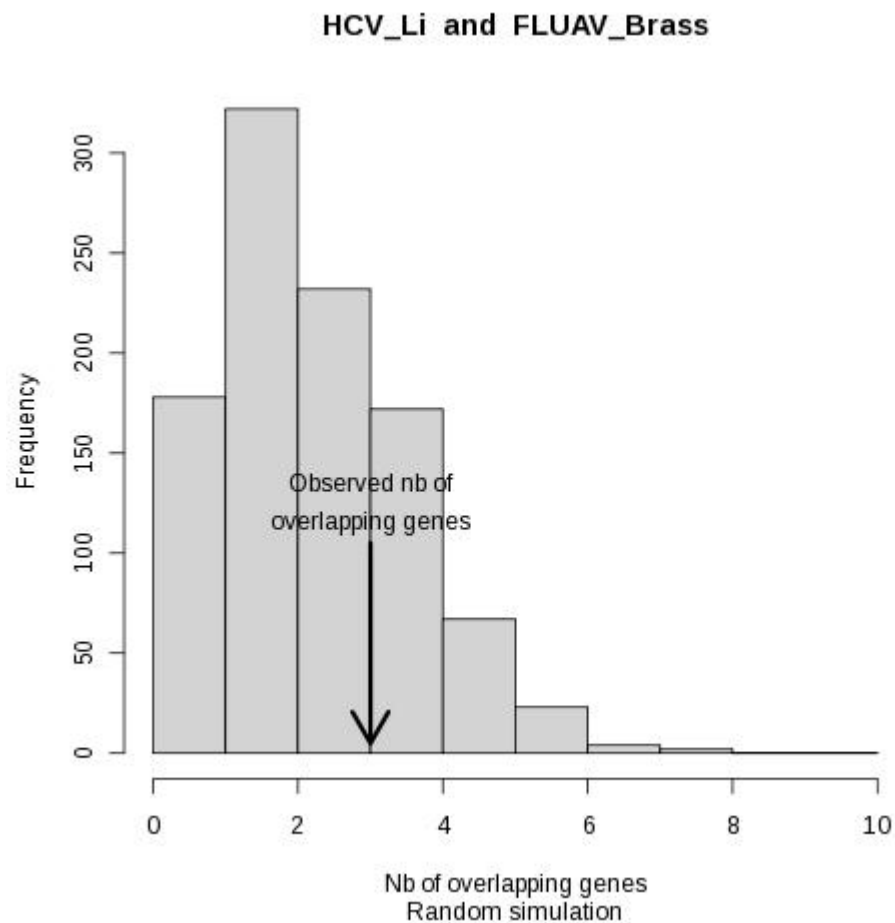

## 21. DV\_Sessions vs. FLUAV\_Brass

DV\_Sessions: 10278 genes tested, 81 genes identified  
FLUAV\_Brass: 17877 genes tested, 133 genes identified  
Number of overlapping genes: 2  
List of overlapping genes: ATP6V0B, NUPL1  
Number of simulations showing 2 or more overlapping genes: 122/1000  
P-value: 0,122  
Random distribution:

DV\_Sessions and FLUAV\_Brass

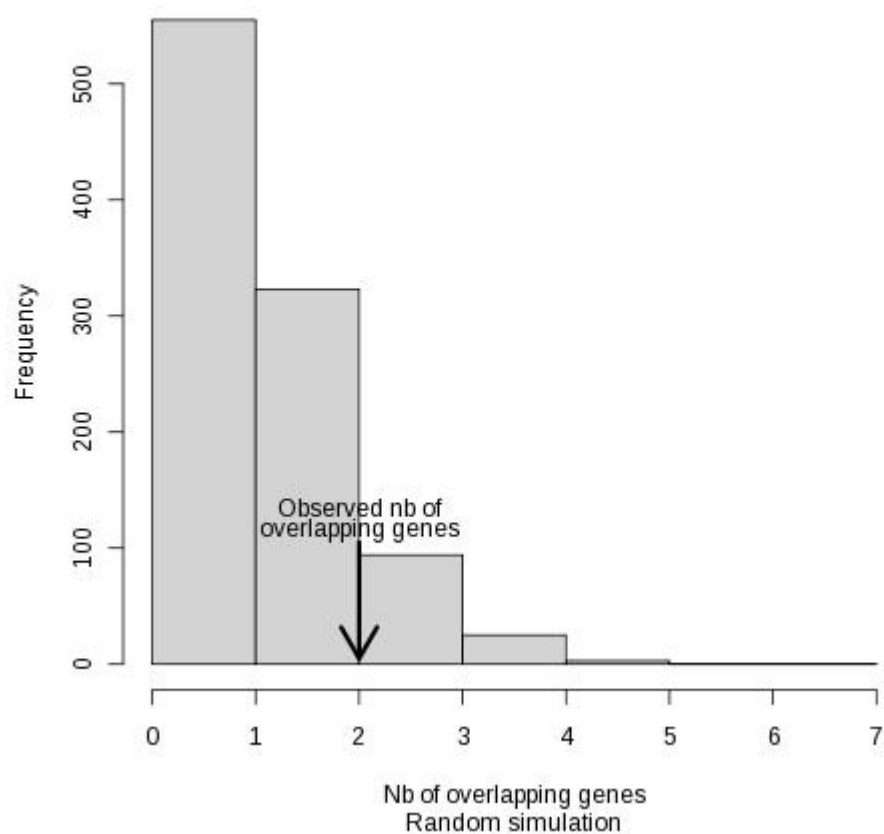

## 22. HCV\_Tai vs. FLUAV\_Brass

HCV\_Tai: 21094 genes tested, 95 genes identified  
FLUAV\_Brass: 17877 genes tested, 133 genes identified  
Number of overlapping genes: 6  
List of overlapping genes: ARCN1, COPA, COPB1, COPB2, COPZ1, COPG  
Number of simulations showing 6 or more overlapping genes: 0/1000  
P-value: < 0,001  
Random distribution:

HCV\_Tai and FLUAV\_Brass

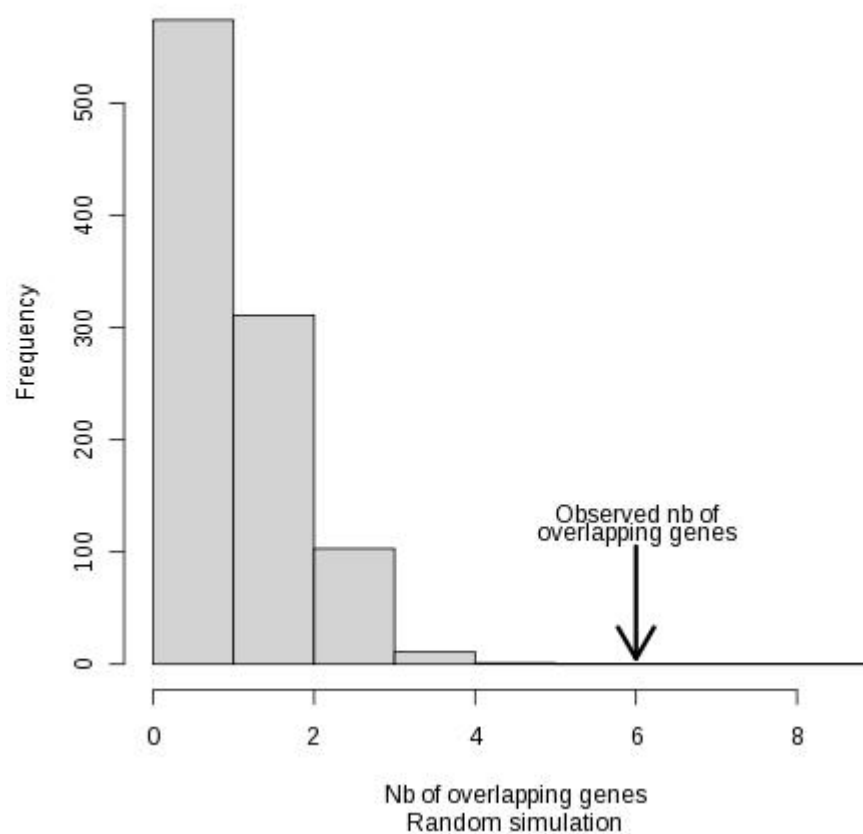

### 23. HIV\_Zhou vs. FLUAV\_Brass

HIV\_Zhou: 20000 genes tested, 206 genes identified  
FLUAV\_Brass: 17877 genes tested, 133 genes identified  
Number of overlapping genes: 2  
List of overlapping genes: HNRNPU, ZNF552  
Number of simulations showing 2 or more overlapping genes: 417/1000  
P-value: 0,417  
Random distribution:

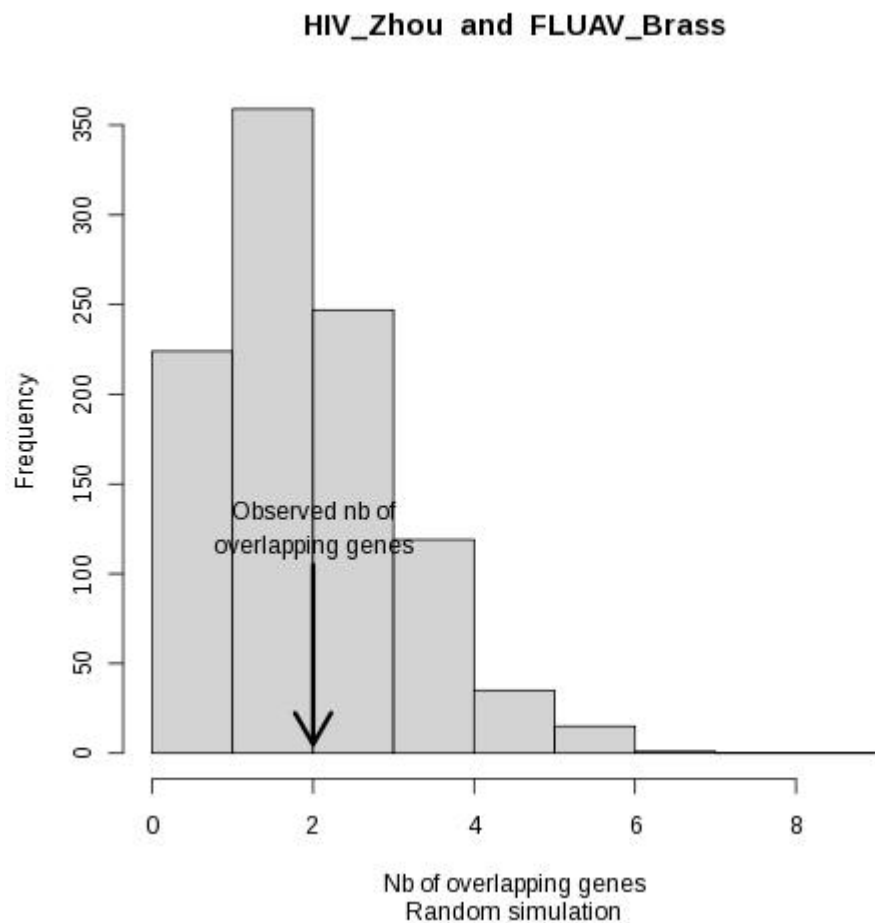

### 24. FLUAV\_Hao vs. FLUAV\_Shapira

FLUAV\_Hao: 10278 genes tested, 78 genes identified  
FLUAV\_Shapira: 1745 genes tested, 242 genes identified  
Number of overlapping genes: 3  
List of overlapping genes: PGD, NXF1, PLXNA2  
Number of simulations showing 3 or more overlapping genes: 277/1000  
P-value: 0,277  
Random distribution:

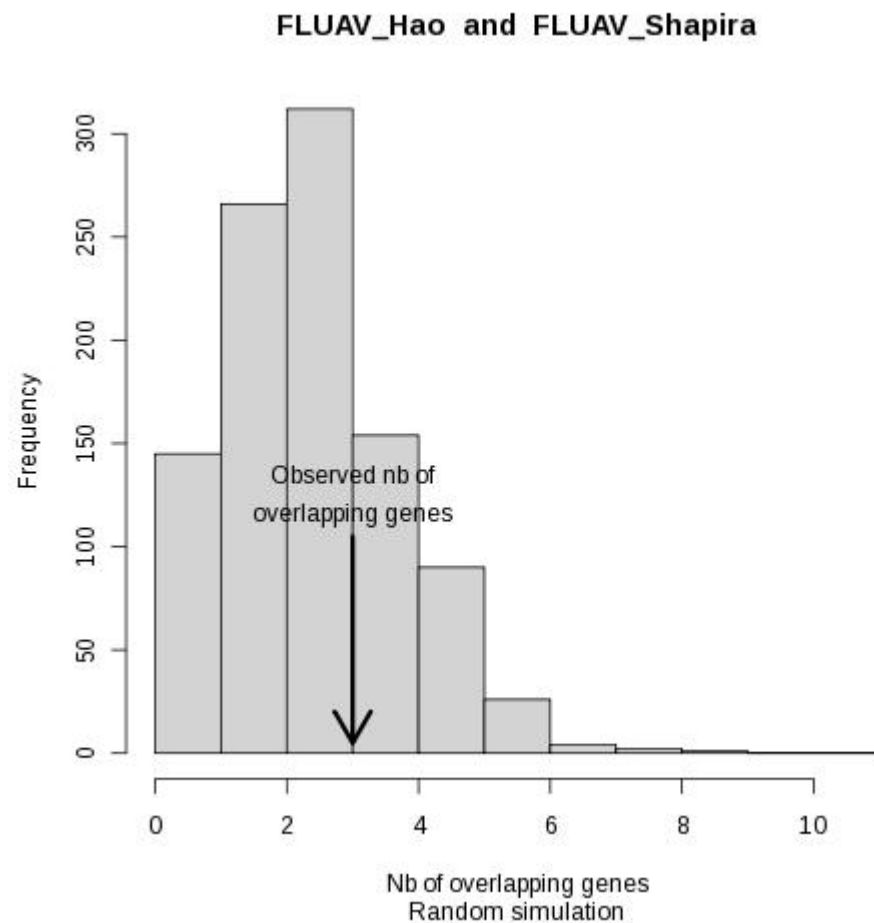



## 25. *FLUAV\_Sui* vs. *FLUAV\_Shapira*

*FLUAV\_Sui*: 25157 genes tested, 99 genes identified

*FLUAV\_Shapira*: 1745 genes tested, 242 genes identified

Number of overlapping genes: 3

List of overlapping genes: FKBP, C21orf33, RGS2

Number of simulations showing 3 or more overlapping genes: 67/1000

P-value: 0,067

Random distribution:

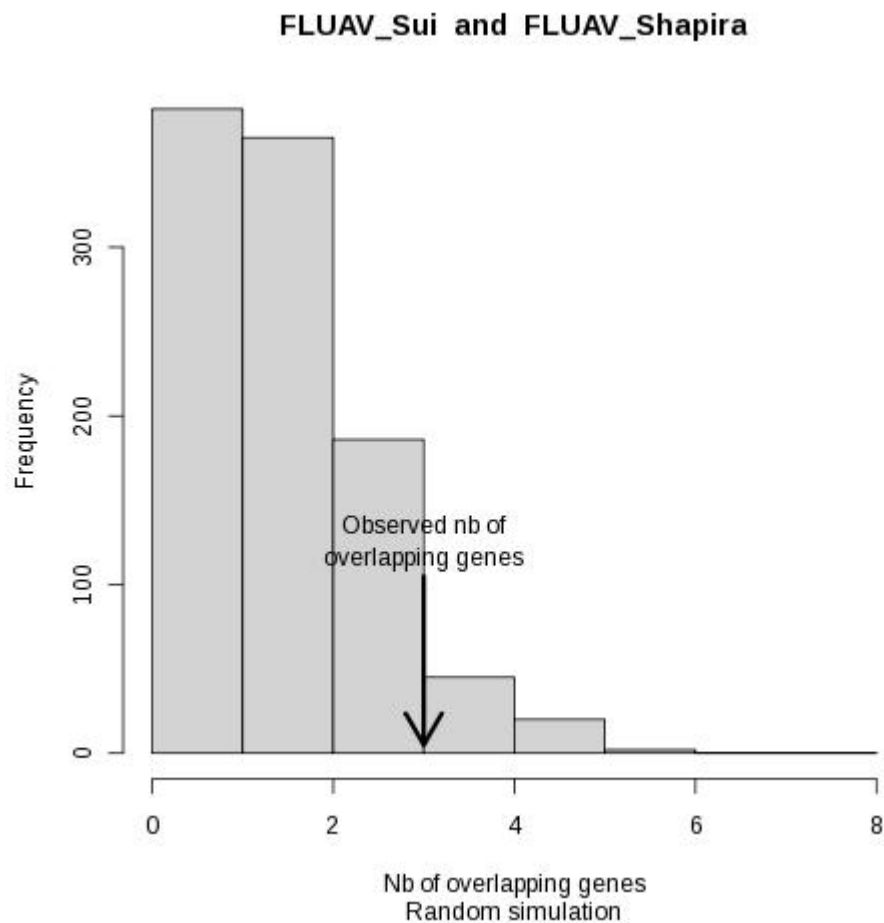

## 26. *FLUAV\_Karlas* vs. *FLUAV\_Shapira*

*FLUAV\_Karlas*: 22843 genes tested, 168 genes identified

*FLUAV\_Shapira*: 1745 genes tested, 242 genes identified

Number of overlapping genes: 6

List of overlapping genes: COPA, IRF2, MYC, SUPT6H, NXF1, B2M

Number of simulations showing 6 or more overlapping genes: 9/1000

P-value: 0,009

Random distribution:

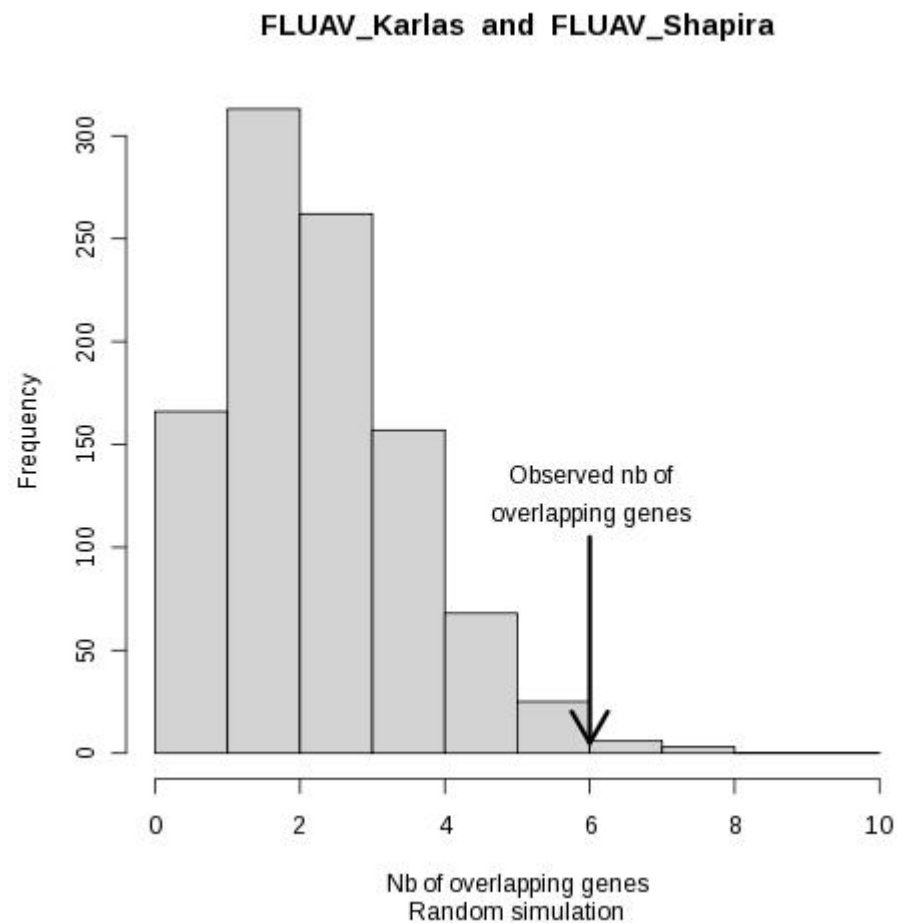

## 27. HIV\_Brass vs. FLUAV\_Shapira

HIV\_Brass: 21121 genes tested, 280 genes identified  
FLUAV\_Shapira: 1745 genes tested, 242 genes identified  
Number of overlapping genes: 4  
List of overlapping genes: PHF3, ZNF512B, CACNG1, NCOR2  
Number of simulations showing 4 or more overlapping genes: 367/1000  
P-value: 0,367  
Random distribution:

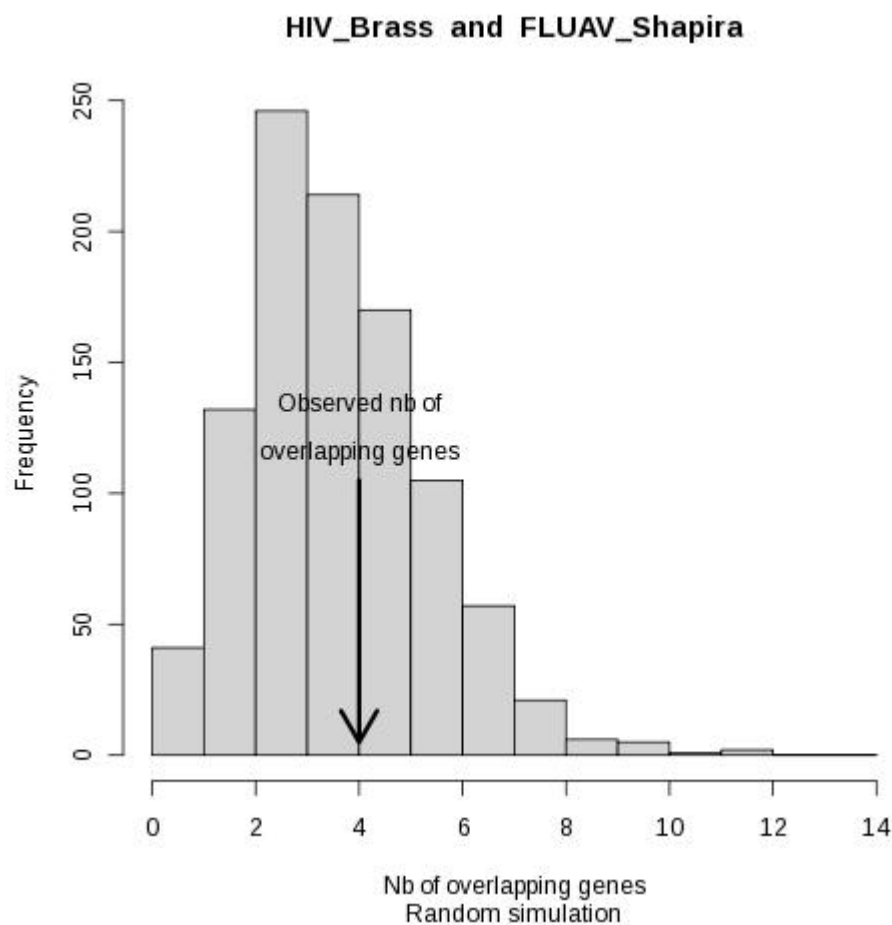

## 28. HIV\_Konig vs. FLUAV\_Shapira

HIV\_Konig: 19628 genes tested, 295 genes identified  
FLUAV\_Shapira: 1745 genes tested, 242 genes identified  
Number of overlapping genes: 5  
List of overlapping genes: EP300, TCF20, UMPS, PTPRU, NXF1  
Number of simulations showing 5 or more overlapping genes: 304/1000  
P-value: 0,304  
Random distribution:

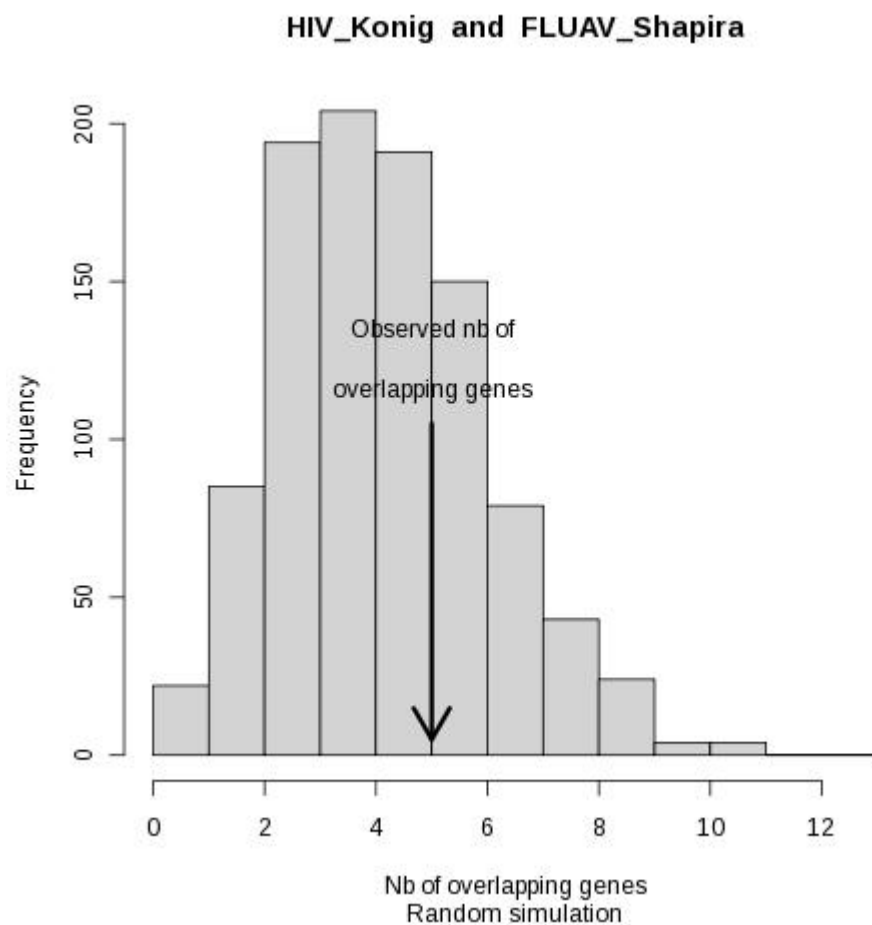

## 29. WNV\_Krishnan vs. FLUAV\_Shapira

WNV\_Krishnan: 21121 genes tested, 305 genes identified

FLUAV\_Shapira: 1745 genes tested, 242 genes identified

Number of overlapping genes: 8

List of overlapping genes: TGFBR1, PLA2G2F, IRF3, HOXC12, MAP2K7, STK3, RNF44, TRIM63

Number of simulations showing 8 or more overlapping genes: 25/1000

P-value: 0,025

Random distribution:

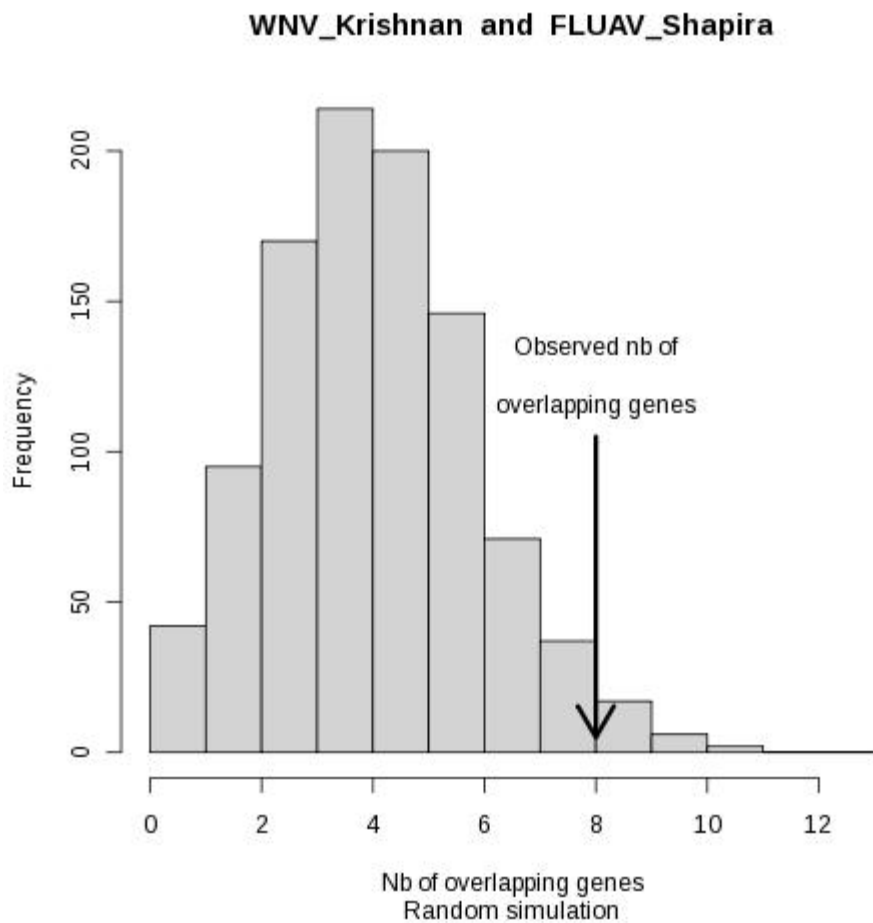

## 30. HCV\_Li vs. FLUAV\_Shapira

HCV\_Li: 19470 genes tested, 262 genes identified

FLUAV\_Shapira: 1745 genes tested, 242 genes identified

Number of overlapping genes: 12

List of overlapping genes: IGFBP6, CISH, SMAD5, TBCD, TFAP2A, WDR37, PELI1, HCCS, IRF3, SMAD6, CCL26, IFITM3

Number of simulations showing 12 or more overlapping genes: 0/1000

P-value: < 0,001

Random distribution:

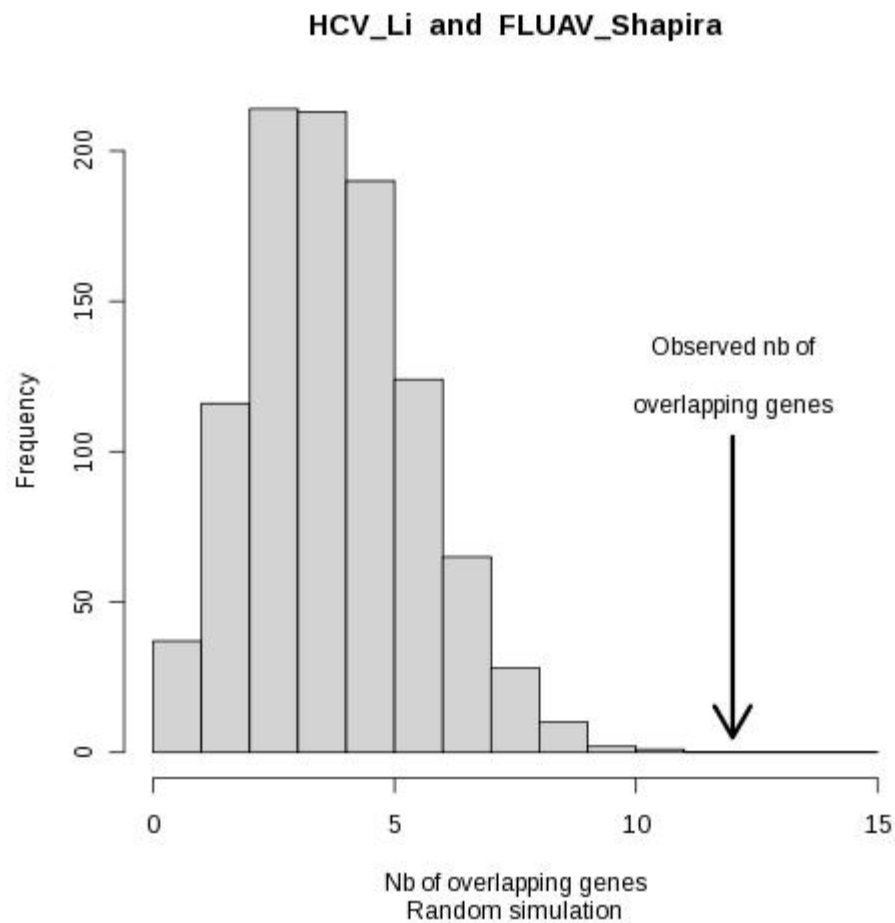

### 31. DV\_Sessions vs. FLUAV\_Shapira

DV\_Sessions: 10278 genes tested, 81 genes identified  
FLUAV\_Shapira: 1745 genes tested, 242 genes identified  
Number of overlapping genes: 0  
List of overlapping genes: none  
Number of simulations showing 0 or more overlapping genes: 1000/1000  
P-value: 1  
Random distribution:

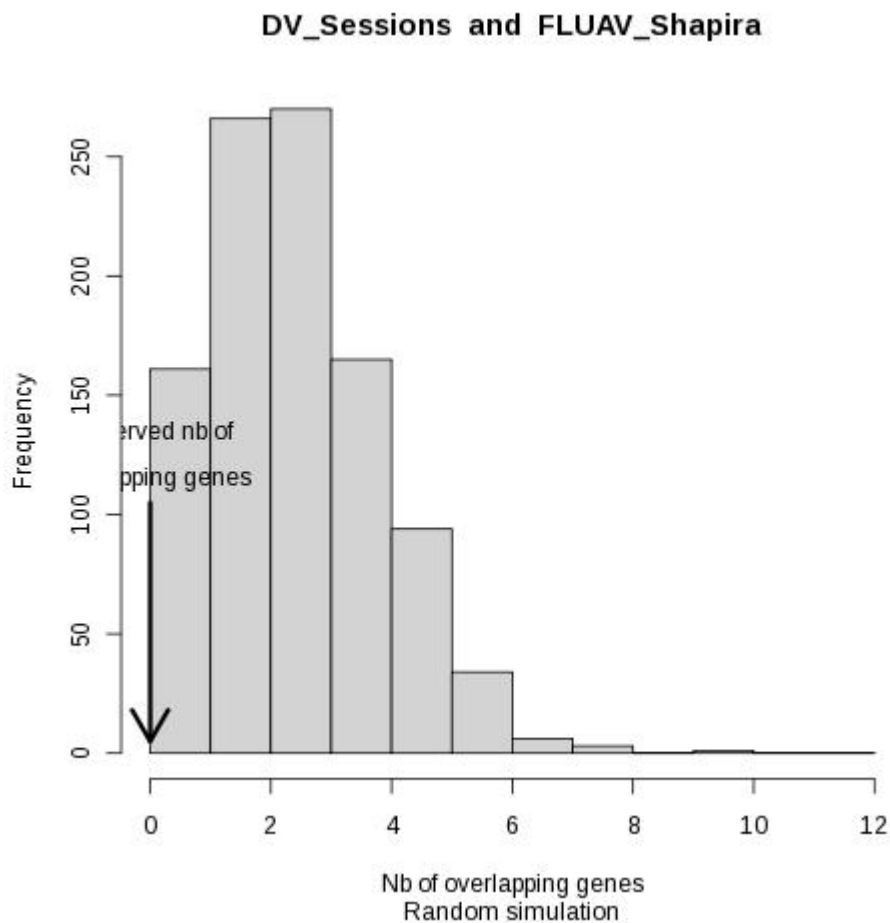

### 32. HCV\_Tai vs. FLUAV\_Shapira

HCV\_Tai: 21094 genes tested, 95 genes identified  
FLUAV\_Shapira: 1745 genes tested, 242 genes identified  
Number of overlapping genes: 3  
List of overlapping genes: COPA, CACNG1, CEBPD  
Number of simulations showing 3 or more overlapping genes: 91/1000  
P-value: 0,091  
Random distribution:

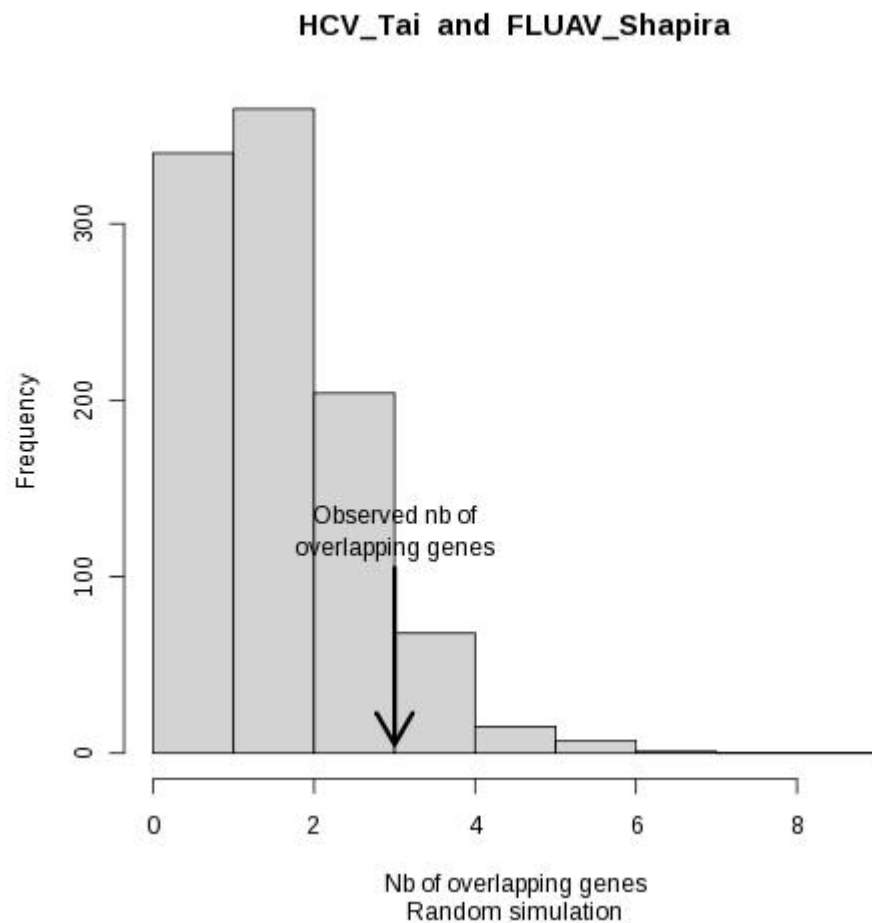

### 33. HIV\_Zhou vs. FLUAV\_Shapira

HIV\_Zhou: 20000 genes tested, 206 genes identified  
FLUAV\_Shapira: 1745 genes tested, 242 genes identified  
Number of overlapping genes: 5  
List of overlapping genes: NFKB1, PELI1, MAP3K9, KLF2, CYCS  
Number of simulations showing 5 or more overlapping genes: 93/1000  
P-value: 0,093  
Random distribution:

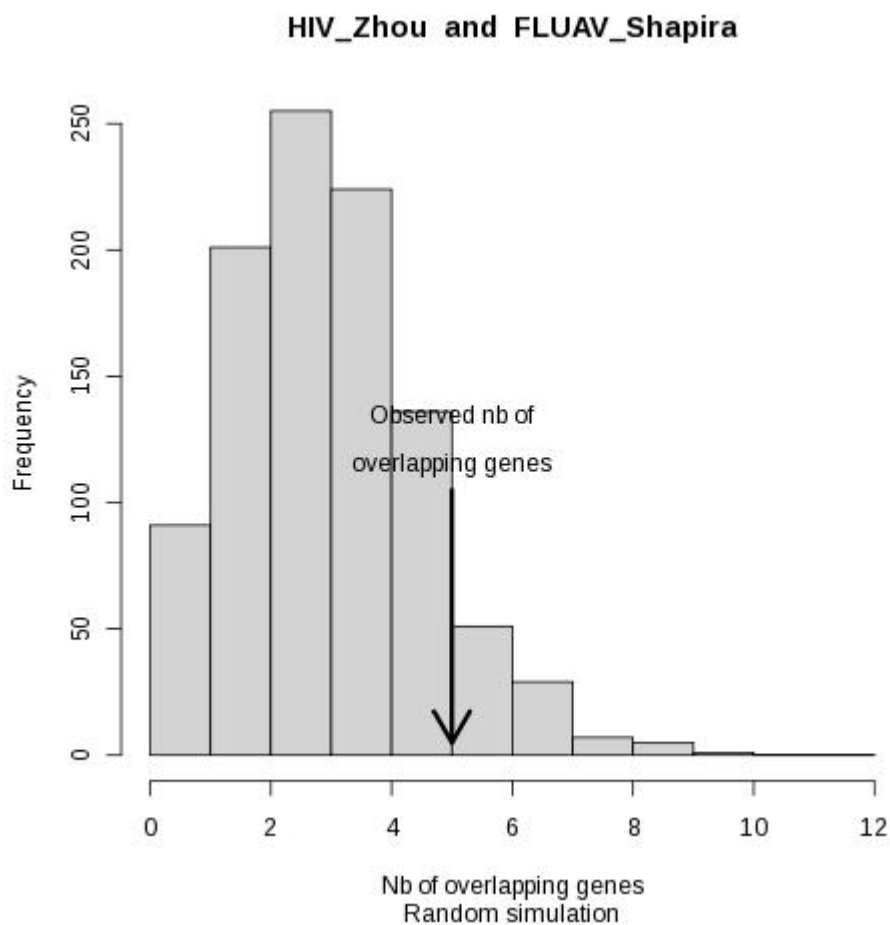

### 34. FLUAV\_Sui vs. FLUAV\_Hao

FLUAV\_Sui: 25157 genes tested, 99 genes identified  
FLUAV\_Hao: 10278 genes tested, 78 genes identified  
Number of overlapping genes: 0  
List of overlapping genes: none  
Number of simulations showing 0 or more overlapping genes: 1000/1000  
P-value: 1  
Random distribution:

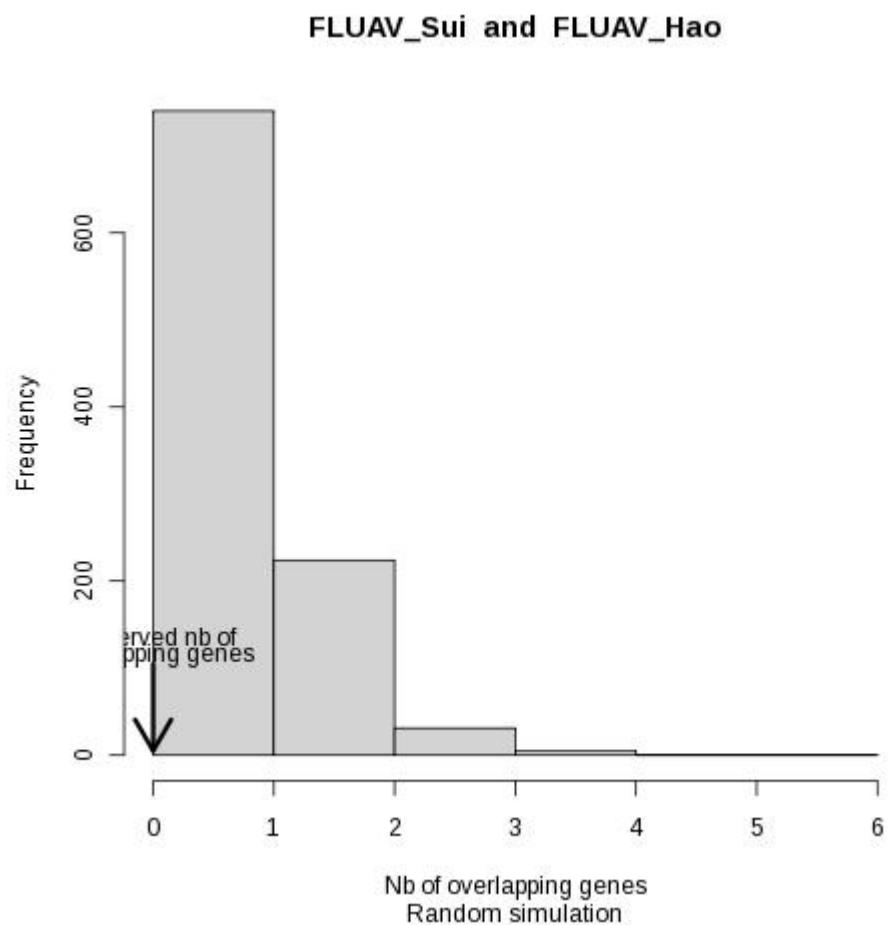

### 35. *FLUAV\_Karlas* vs. *FLUAV\_Hao*

*FLUAV\_Karlas*: 22843 genes tested, 168 genes identified

*FLUAV\_Hao*: 10278 genes tested, 78 genes identified

Number of overlapping genes: 12

List of overlapping genes: ATP6V0C, FAU, NUP98, RPS5, RPS10, RPS14, RPS16, EIF3C, ATP6V0D1, NXF1, COPG, DMAP1

Number of simulations showing 12 or more overlapping genes: 0/1000

P-value: < 0,001

Random distribution:

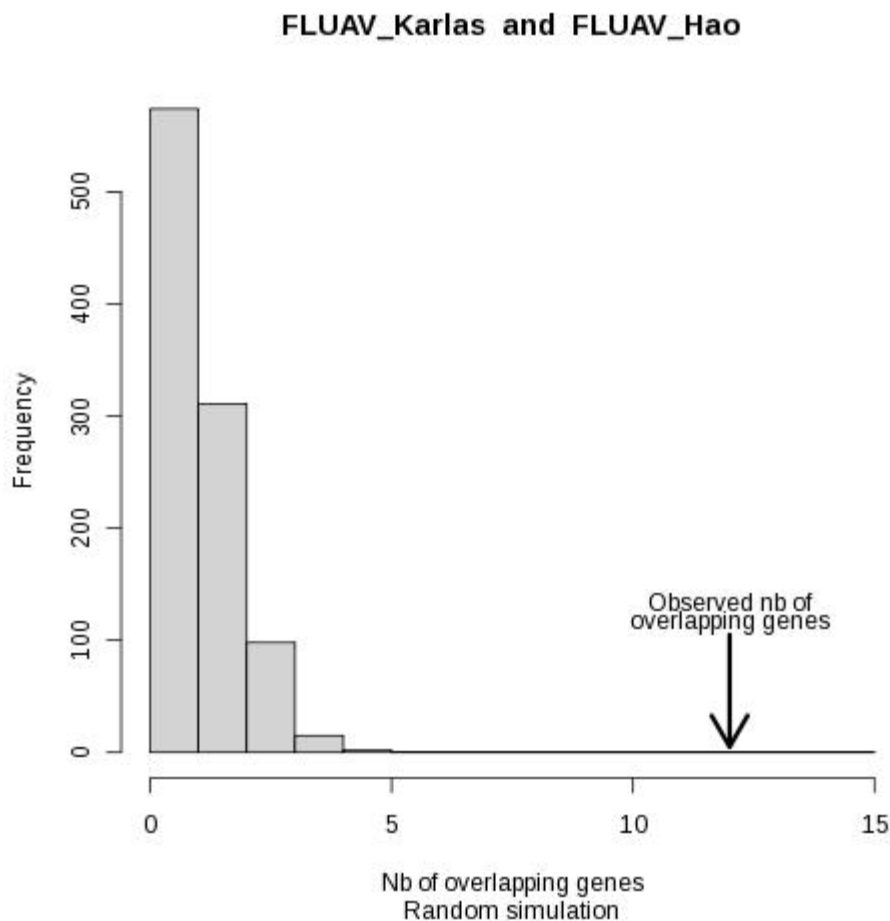

### 36. *HIV\_Brass* vs. *FLUAV\_Hao*

*HIV\_Brass*: 21121 genes tested, 280 genes identified

*FLUAV\_Hao*: 10278 genes tested, 78 genes identified

Number of overlapping genes: 2

List of overlapping genes: EIF3H, RAB1B

Number of simulations showing 2 or more overlapping genes: 290/1000

P-value: 0,290

Random distribution:

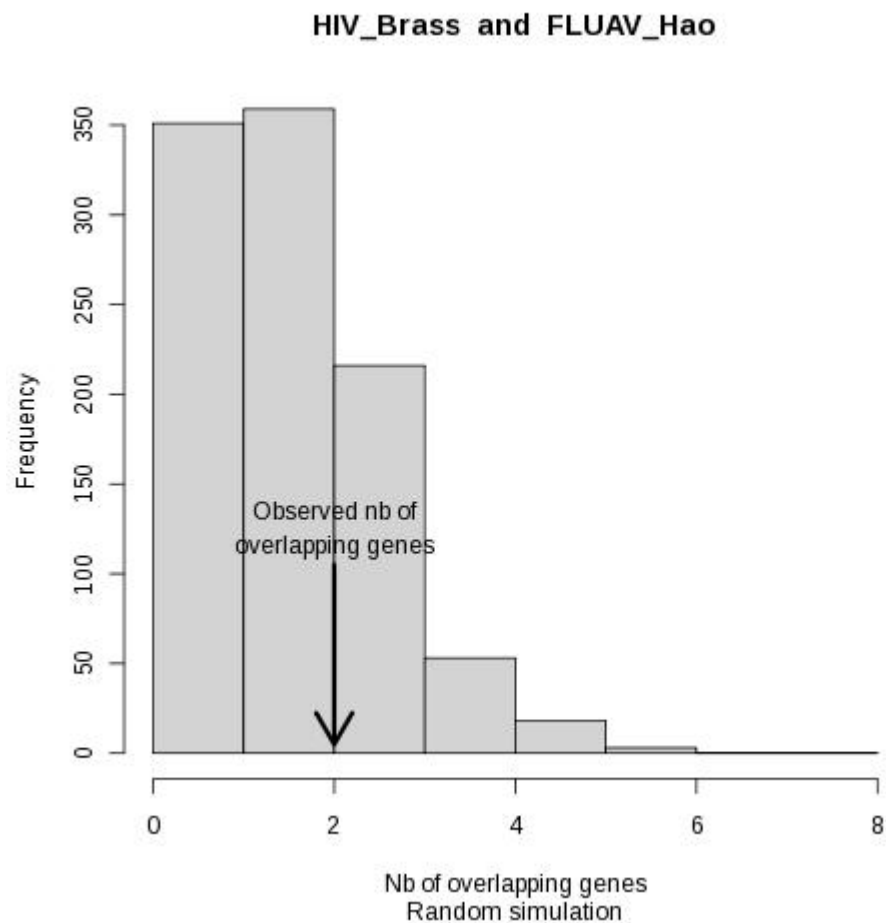

### 37. HIV\_Konig vs. FLUAV\_Hao

HIV\_Konig: 19628 genes tested, 295 genes identified

FLUAV\_Hao: 10278 genes tested, 78 genes identified

Number of overlapping genes: 9

List of overlapping genes: ATP6V0C, MAT2A, NUP98, PSMB6, PSMD12, NXF1, DCP2, SNRPC, AQR

Number of simulations showing 9 or more overlapping genes: 0/1000

P-value: < 0,001

Random distribution:

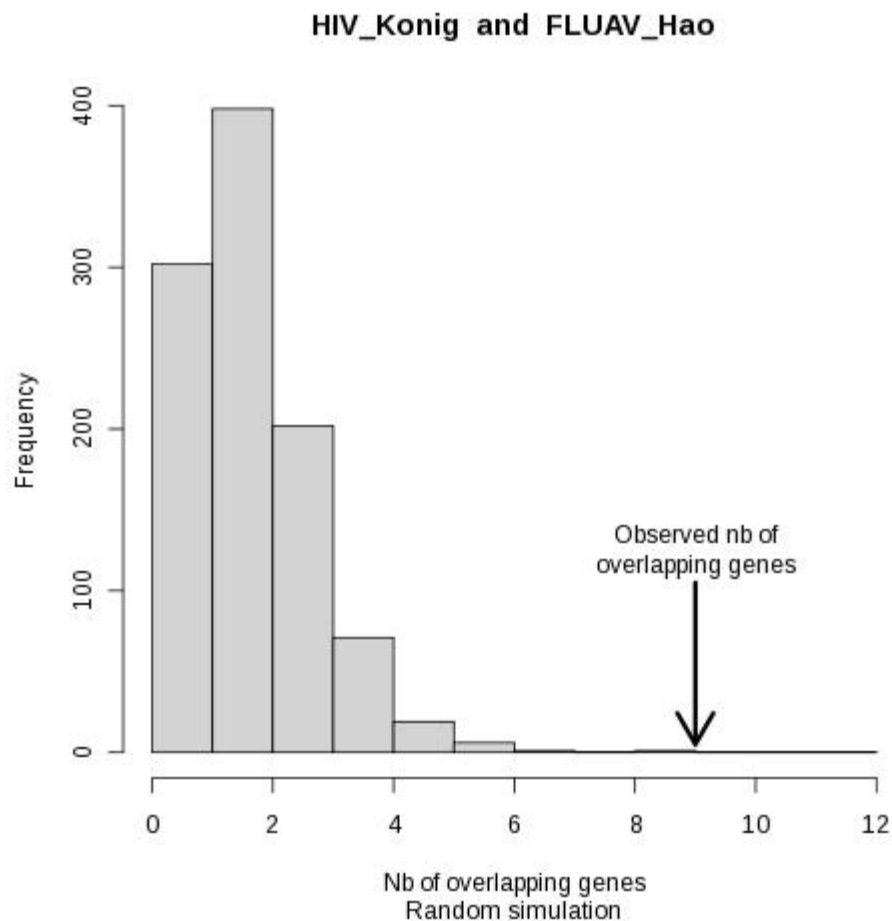

### 38. WNV\_Krishnan vs. FLUAV\_Hao

WNV\_Krishnan: 21121 genes tested, 305 genes identified

FLUAV\_Hao: 10278 genes tested, 78 genes identified

Number of overlapping genes: 2

List of overlapping genes: ATP6V0C, ATP6V0D1

Number of simulations showing 2 or more overlapping genes: 309/1000

P-value: 0,309

Random distribution:

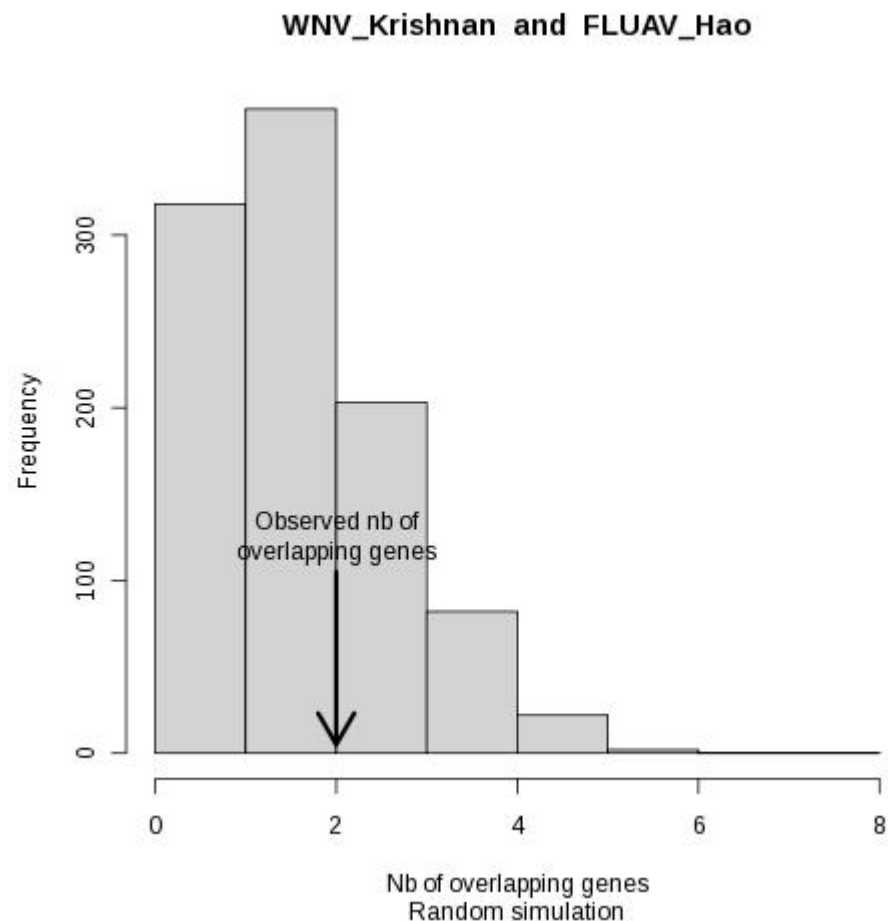

### 39. HCV\_Li vs. FLUAV\_Hao

HCV\_Li: 19470 genes tested, 262 genes identified  
FLUAV\_Hao: 10278 genes tested, 78 genes identified  
Number of overlapping genes: 3  
List of overlapping genes: FAU, CNOT3, RAB10  
Number of simulations showing 3 or more overlapping genes: 104/1000  
P-value: 0,104  
Random distribution:

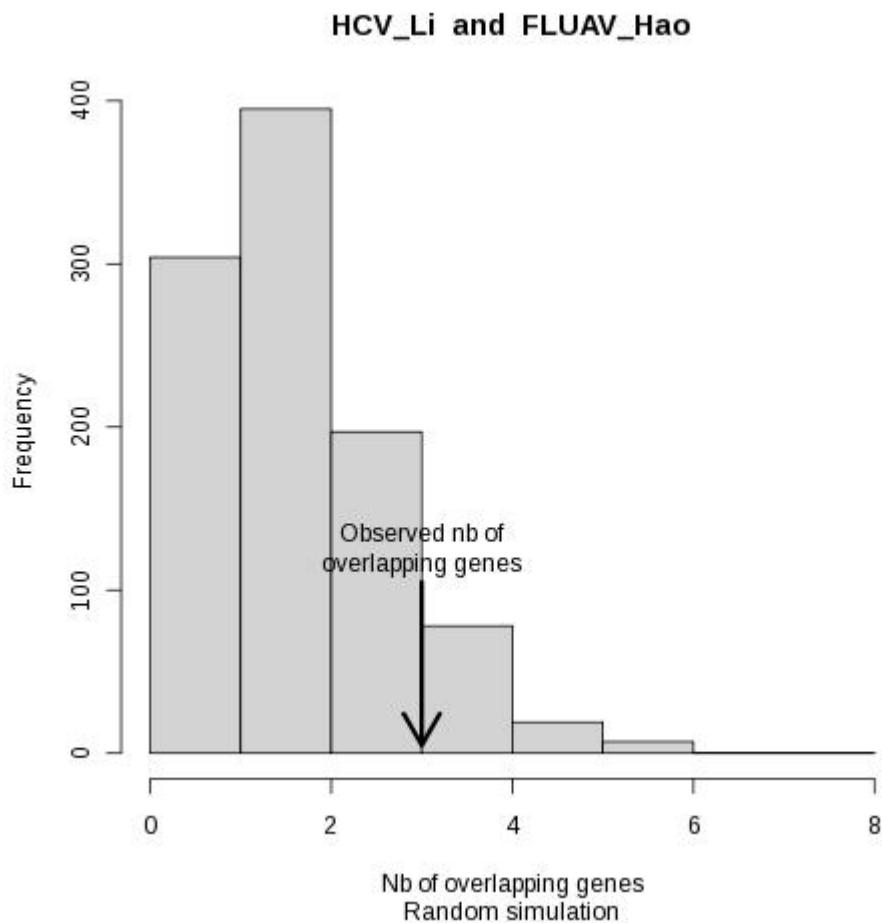

### 40. DV\_Sessions vs. FLUAV\_Hao

DV\_Sessions: 10278 genes tested, 81 genes identified  
FLUAV\_Hao: 10278 genes tested, 78 genes identified  
Number of overlapping genes: 1  
List of overlapping genes: ATP6V0D1  
Number of simulations showing 1 or more overlapping genes: 475/1000  
P-value: 0,475  
Random distribution:

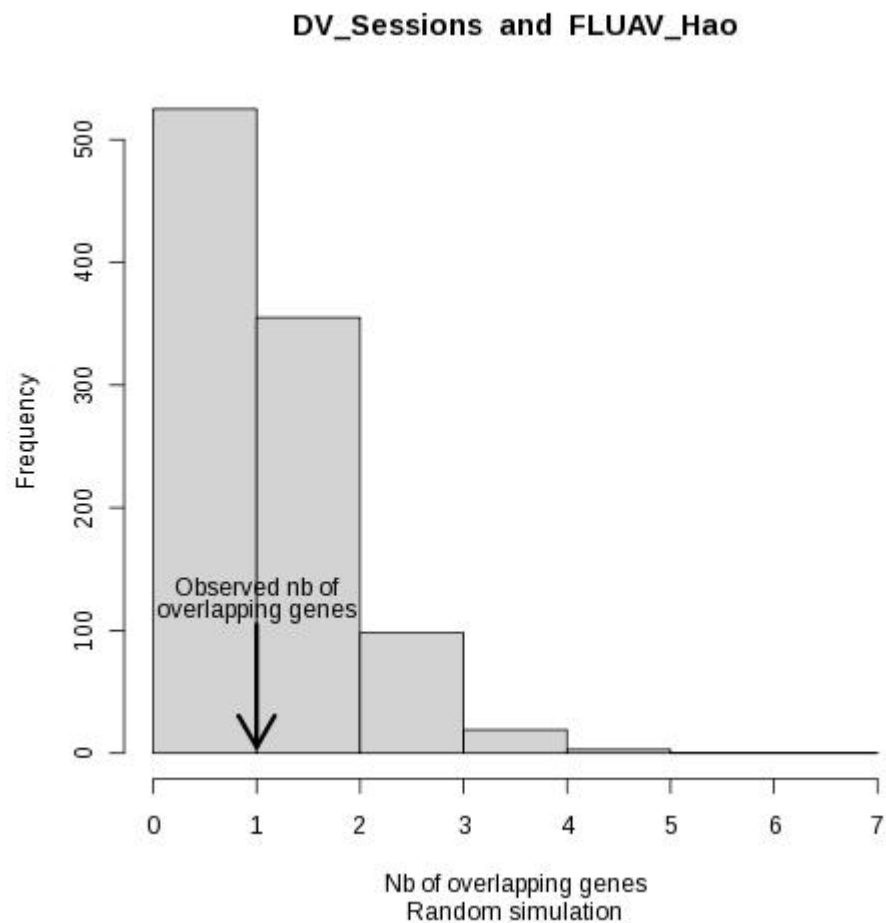



### 41. HCV\_Tai vs. FLUAV\_Hao

HCV\_Tai: 21094 genes tested, 95 genes identified  
FLUAV\_Hao: 10278 genes tested, 78 genes identified  
Number of overlapping genes: 3  
List of overlapping genes: ARCN1, COPG, CCDC12  
Number of simulations showing 3 or more overlapping genes: 7/1000  
P-value: 0,007  
Random distribution:

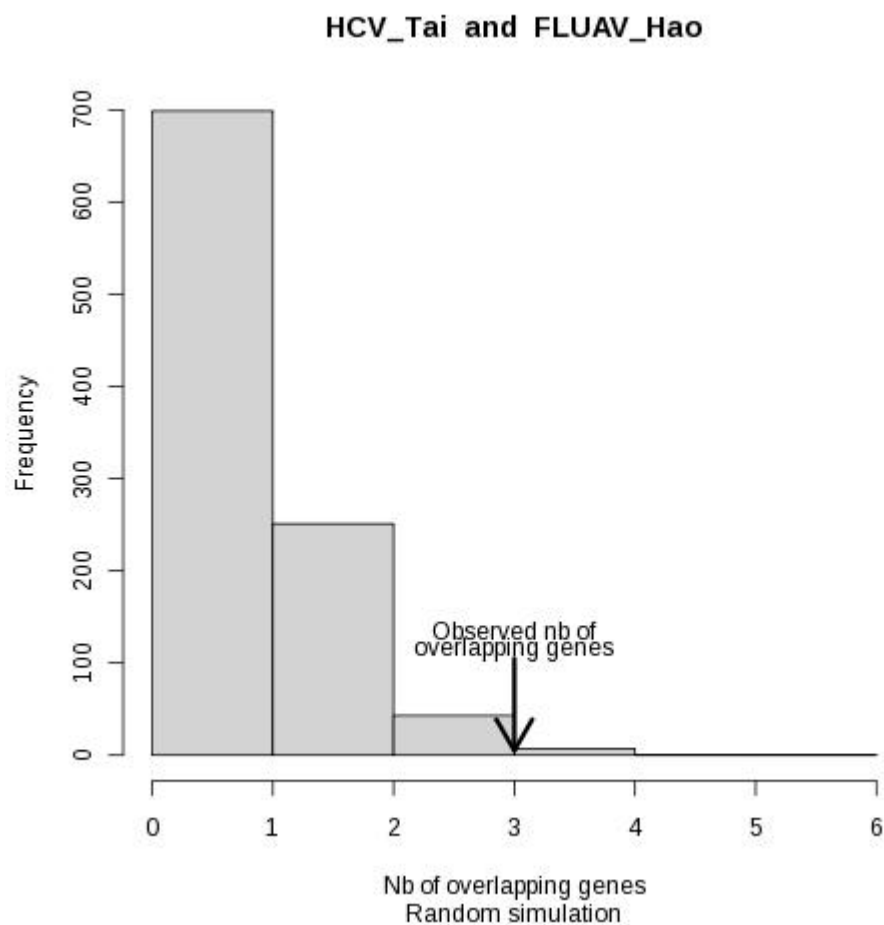

### 42. HIV\_Zhou vs. FLUAV\_Hao

HIV\_Zhou: 20000 genes tested, 206 genes identified  
FLUAV\_Hao: 10278 genes tested, 78 genes identified  
Number of overlapping genes: 1  
List of overlapping genes: ATP5B  
Number of simulations showing 1 or more overlapping genes: 557/1000  
P-value: 0,557  
Random distribution:

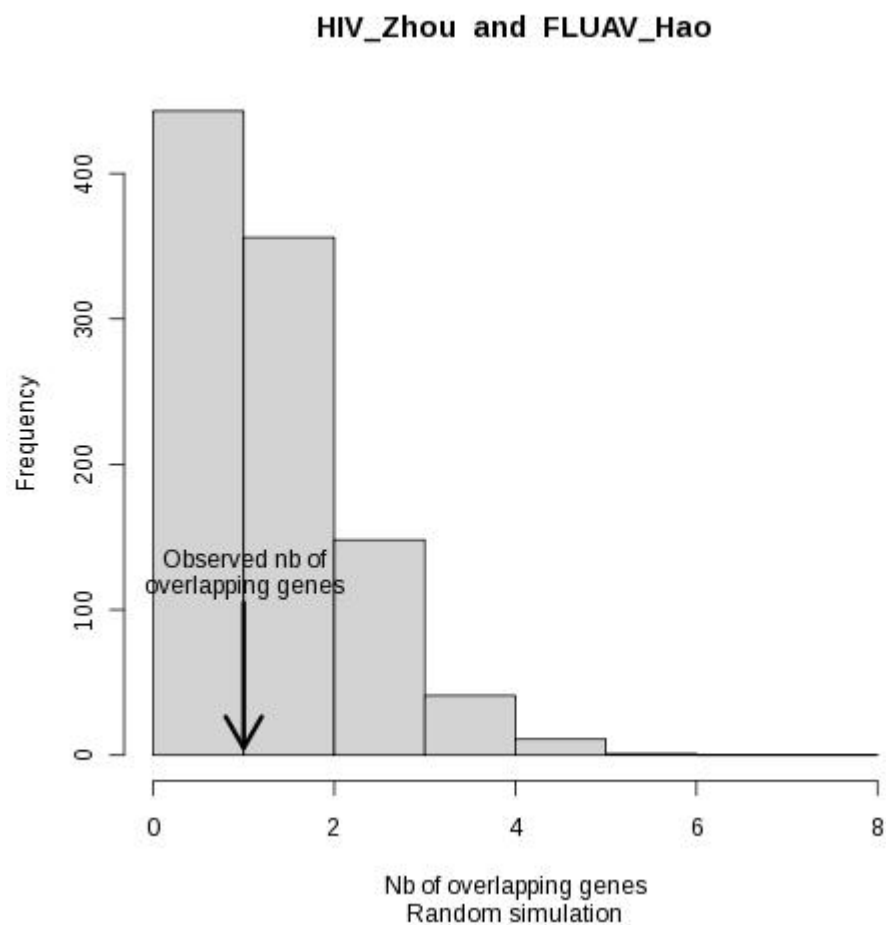

### 43. *FLUAV\_Karlas* vs. *FLUAV\_Sui*

*FLUAV\_Karlas*: 22843 genes tested, 168 genes identified  
*FLUAV\_Sui*: 25157 genes tested, 99 genes identified  
Number of overlapping genes: 2  
List of overlapping genes: PLAU, SNW1  
Number of simulations showing 2 or more overlapping genes: 137/1000  
P-value: 0,137  
Random distribution:

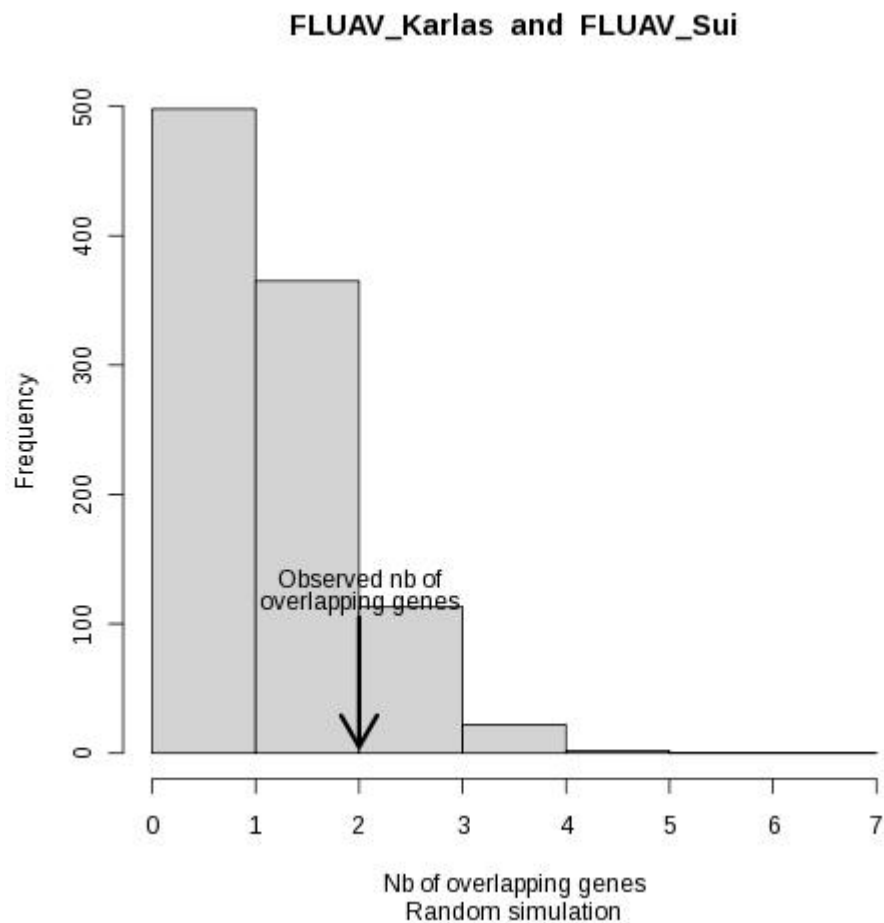

### 44. *HIV\_Brass* vs. *FLUAV\_Sui*

*HIV\_Brass*: 21121 genes tested, 280 genes identified  
*FLUAV\_Sui*: 25157 genes tested, 99 genes identified  
Number of overlapping genes: 3  
List of overlapping genes: AKT1, CLNS1A, MDN1  
Number of simulations showing 3 or more overlapping genes: 109/1000  
P-value: 0,109  
Random distribution:

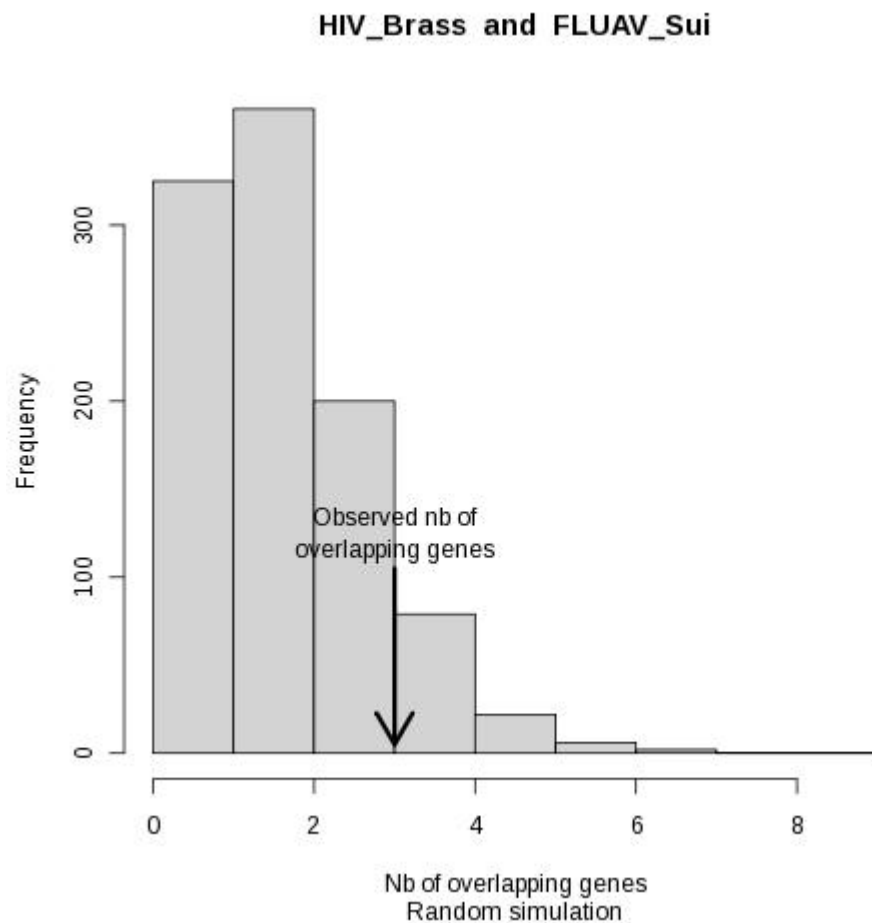

#### 45. HIV\_Konig vs. FLUAV\_Sui

HIV\_Konig: 19628 genes tested, 295 genes identified  
FLUAV\_Sui: 25157 genes tested, 99 genes identified  
Number of overlapping genes: 3  
List of overlapping genes: STXBP1, SNW1, NDUFAF2  
Number of simulations showing 3 or more overlapping genes: 96/1000  
P-value: 0,096  
Random distribution:

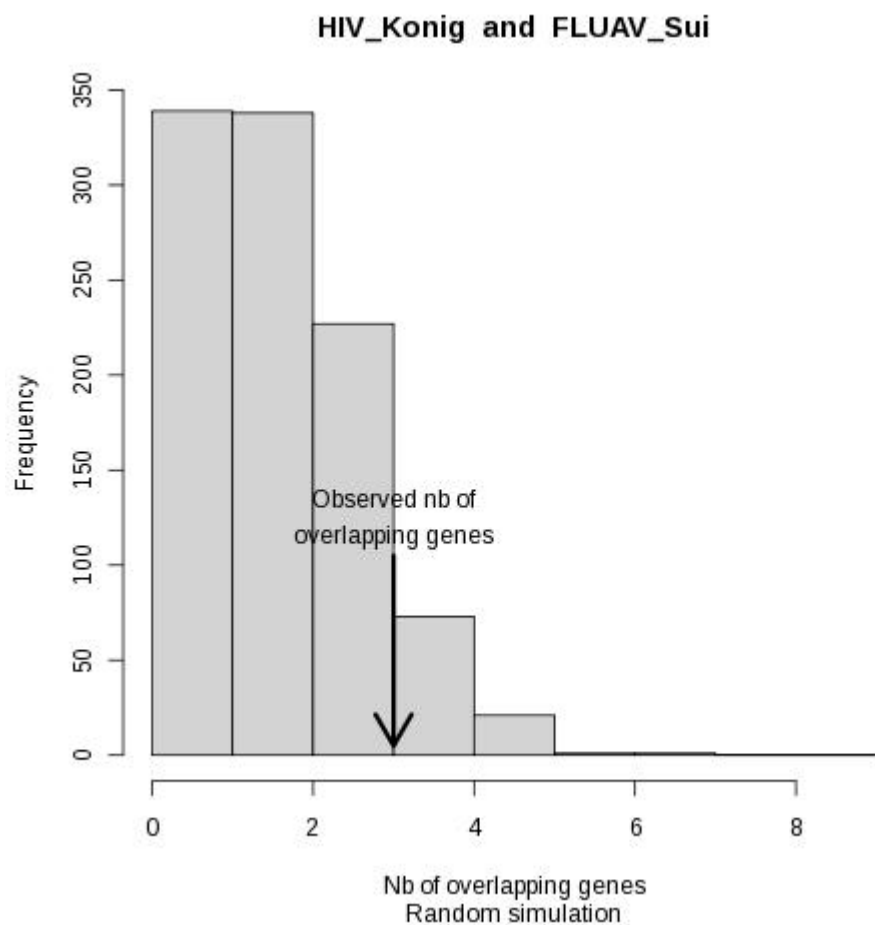

#### 46. WNV\_Krishnan vs. FLUAV\_Sui

WNV\_Krishnan: 21121 genes tested, 305 genes identified  
FLUAV\_Sui: 25157 genes tested, 99 genes identified  
Number of overlapping genes: 2  
List of overlapping genes: GRK6, VPS33A  
Number of simulations showing 2 or more overlapping genes: 305/1000  
P-value: 0,305  
Random distribution:

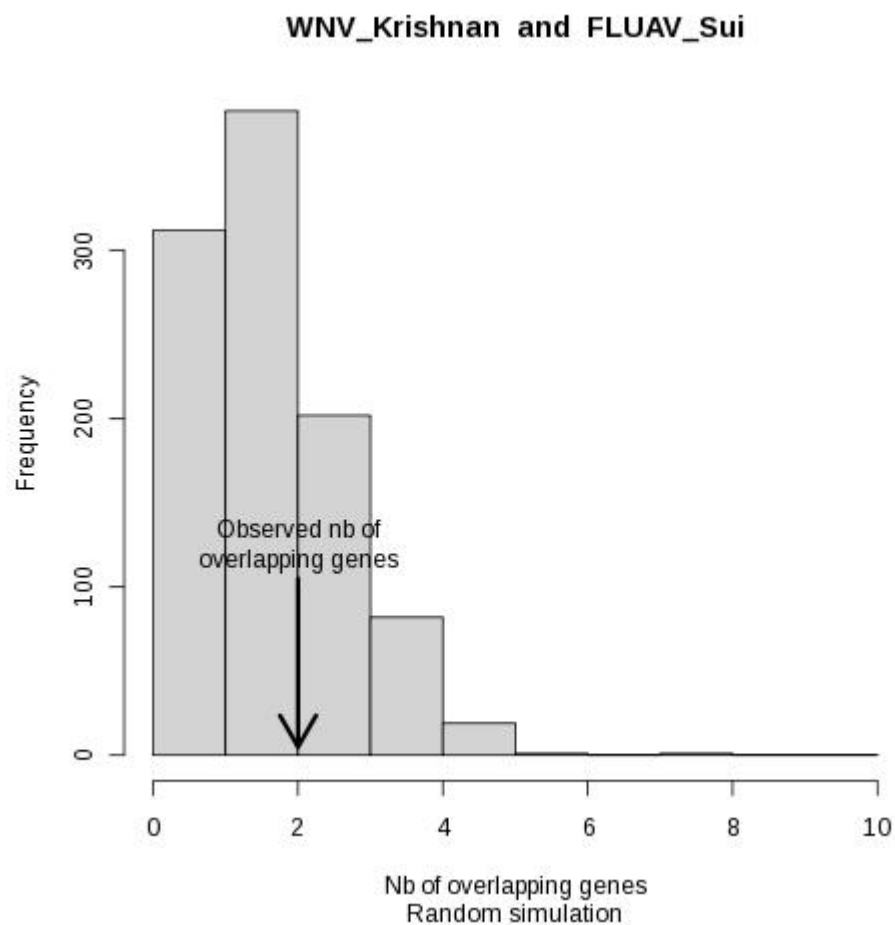

#### 47. HCV\_Li vs. FLUAV\_Sui

HCV\_Li: 19470 genes tested, 262 genes identified  
FLUAV\_Sui: 25157 genes tested, 99 genes identified  
Number of overlapping genes: 3  
List of overlapping genes: MARK3, STAT3, SUZ12  
Number of simulations showing 3 or more overlapping genes: 76/1000  
P-value: 0,076  
Random distribution:

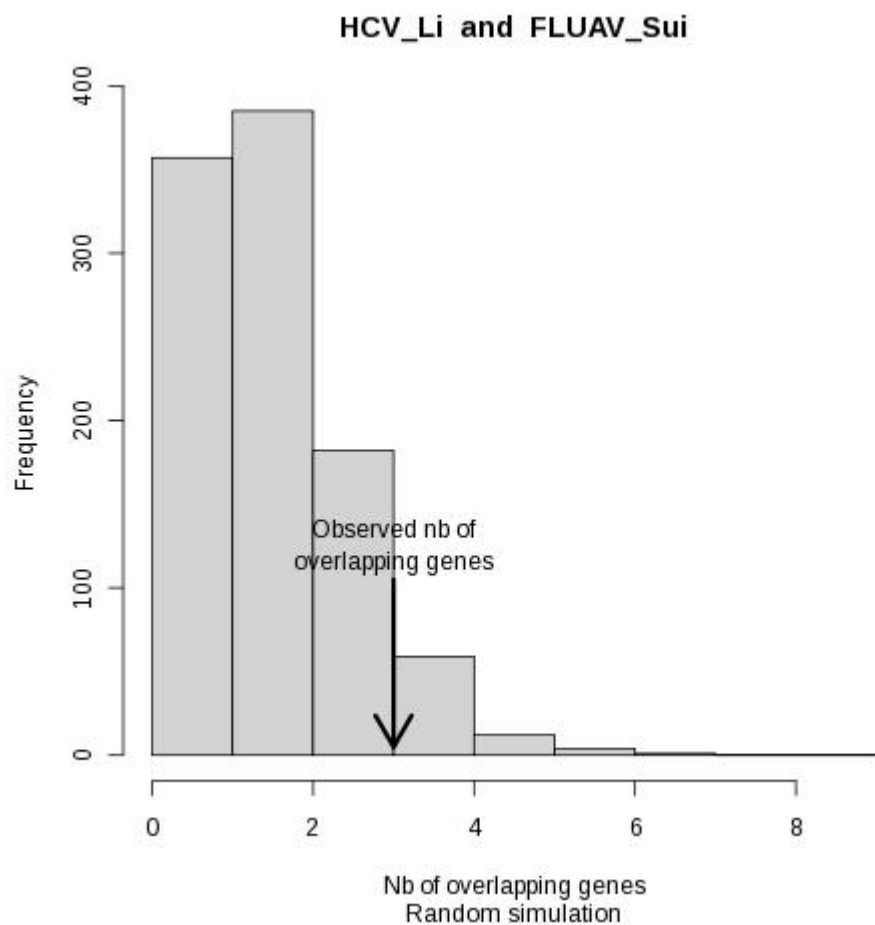

#### 48. DV\_Sessions vs. FLUAV\_Sui

DV\_Sessions: 10278 genes tested, 81 genes identified  
FLUAV\_Sui: 25157 genes tested, 99 genes identified  
Number of overlapping genes: 1  
List of overlapping genes: FAM13B  
Number of simulations showing 1 or more overlapping genes: 259/1000  
P-value: 0,259  
Random distribution:

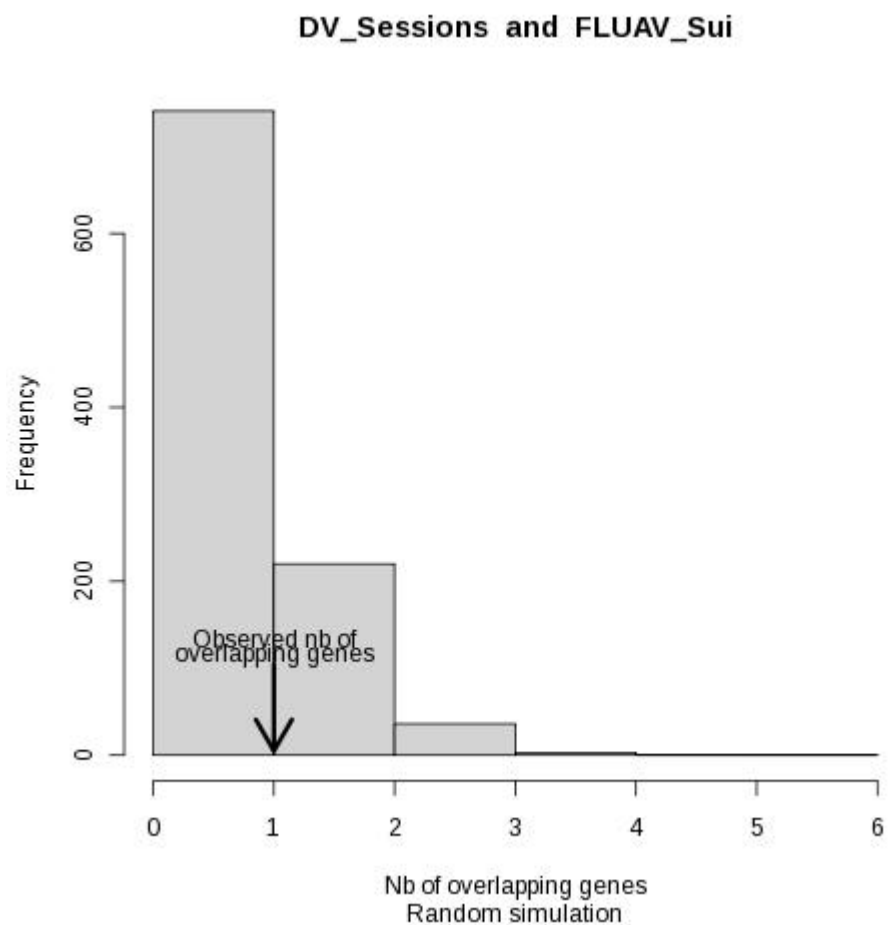

### 49. HCV\_Tai vs. FLUAV\_Sui

HCV\_Tai: 21094 genes tested, 95 genes identified  
FLUAV\_Sui: 25157 genes tested, 99 genes identified  
Number of overlapping genes: 0  
List of overlapping genes: none  
Number of simulations showing 0 or more overlapping genes: 1000/1000  
P-value: 1  
Random distribution:

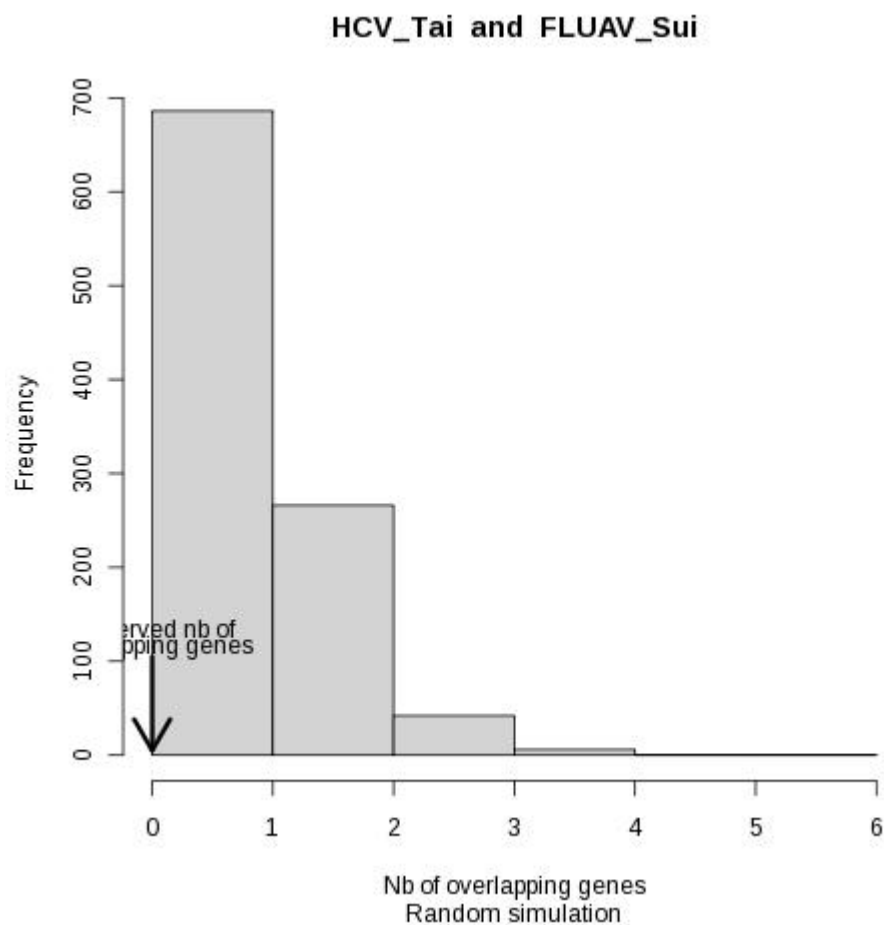

### 50. HIV\_Zhou vs. FLUAV\_Sui

HIV\_Zhou: 20000 genes tested, 206 genes identified  
FLUAV\_Sui: 25157 genes tested, 99 genes identified  
Number of overlapping genes: 2  
List of overlapping genes: AKT1, STIP1  
Number of simulations showing 2 or more overlapping genes: 184/1000  
P-value: 0,184  
Random distribution:

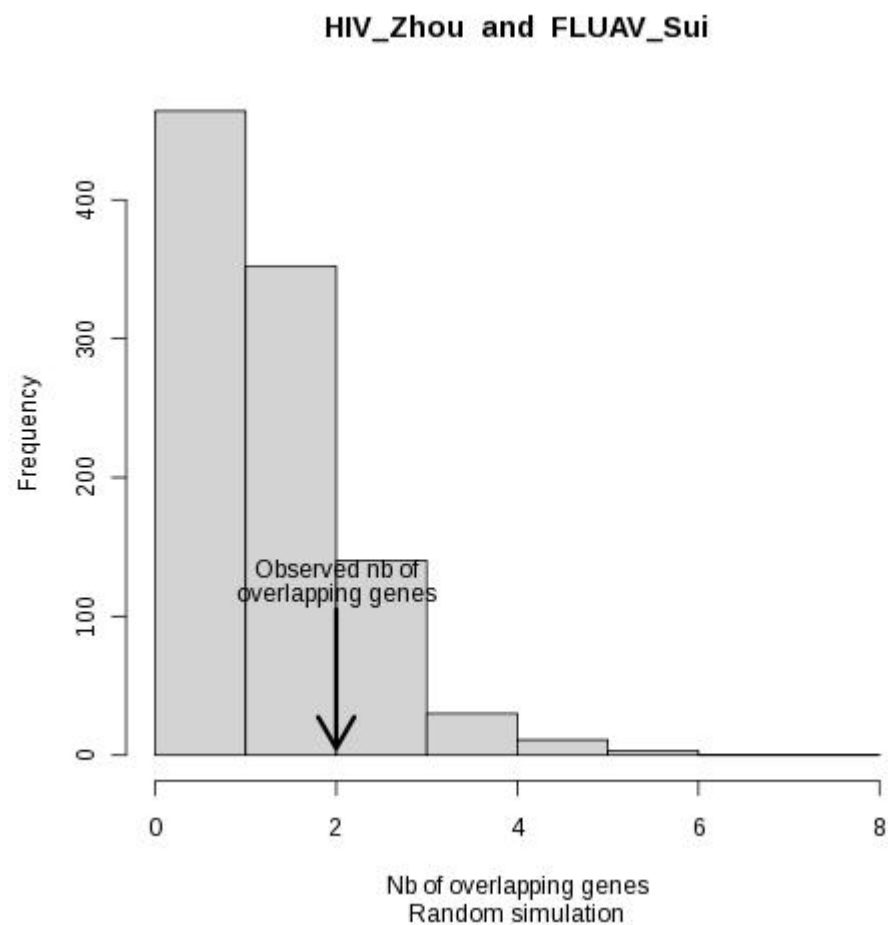

## 51. HIV\_Brass vs. FLUAV\_Karlas

HIV\_Brass: 21121 genes tested, 280 genes identified  
FLUAV\_Karlas: 22843 genes tested, 168 genes identified  
Number of overlapping genes: 4  
List of overlapping genes: AP2M1, TFE3, MED6, ZBTB2  
Number of simulations showing 4 or more overlapping genes: 147/1000  
P-value: 0,147  
Random distribution:

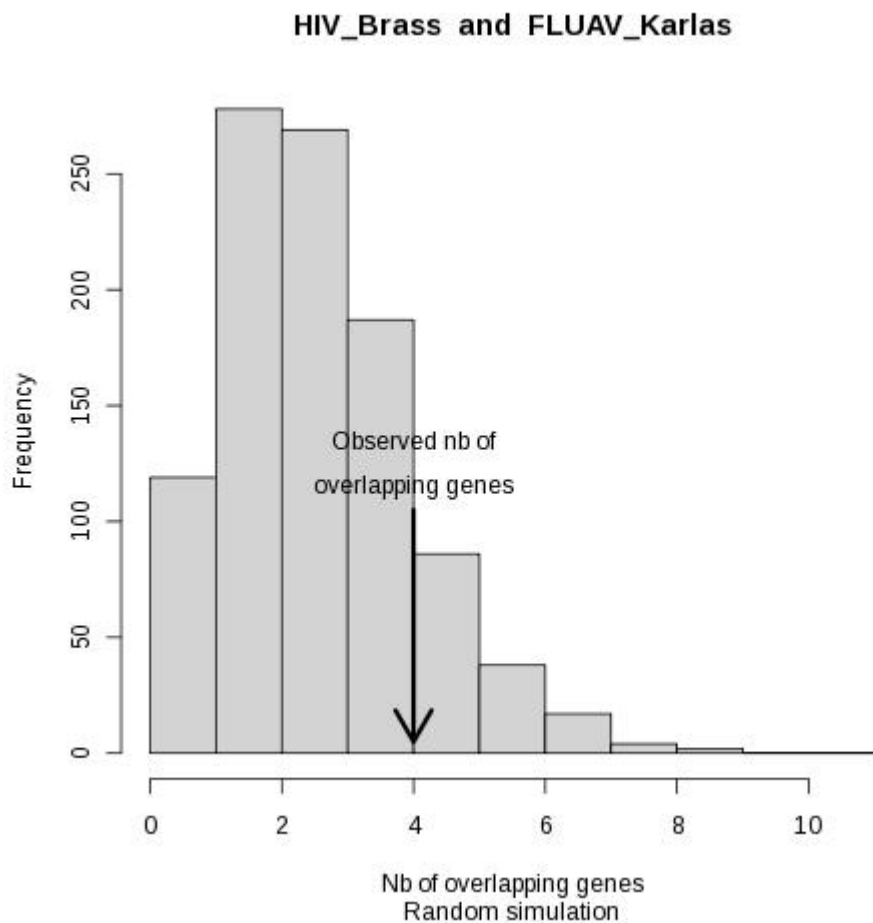

## 52. HIV\_Konig vs. FLUAV\_Karlas

HIV\_Konig: 19628 genes tested, 295 genes identified  
FLUAV\_Karlas: 22843 genes tested, 168 genes identified  
Number of overlapping genes: 14  
List of overlapping genes: ATP6VOC, KPNB1, NUP98, PHF2, PSMA1, MED6, SF3A1, NXF1, PRPF8, SNW1, STAB1, SF3B1, PPP1R14D, XAB2  
Number of simulations showing 14 or more overlapping genes: 0/1000  
P-value: < 0,001  
Random distribution:

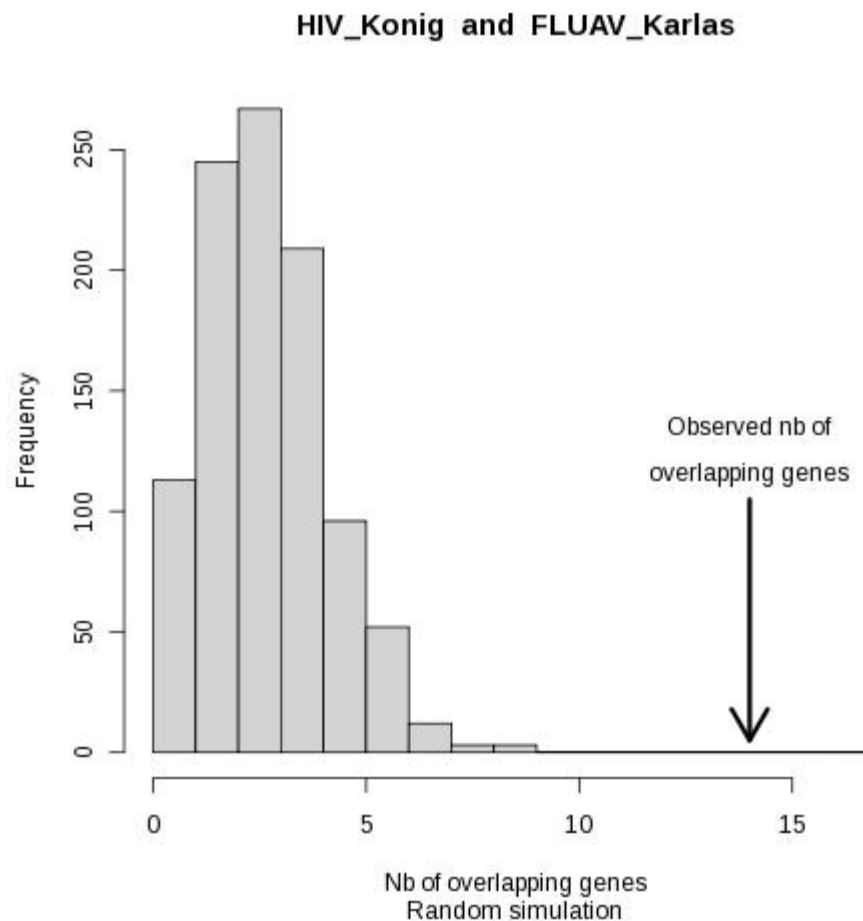

### 53. WNV\_Krishnan vs. FLUAV\_Karlas

WNV\_Krishnan: 21121 genes tested, 305 genes identified

FLUAV\_Karlas: 22843 genes tested, 168 genes identified

Number of overlapping genes: 8

List of overlapping genes: ATCAY, ATP6V1A, ATP6V1B2, ATP6V0C, ATP6AP1, CLK1, ATP6V0D1, XAB2

Number of simulations showing 8 or more overlapping genes: 2/1000

P-value: 0,002

Random distribution:

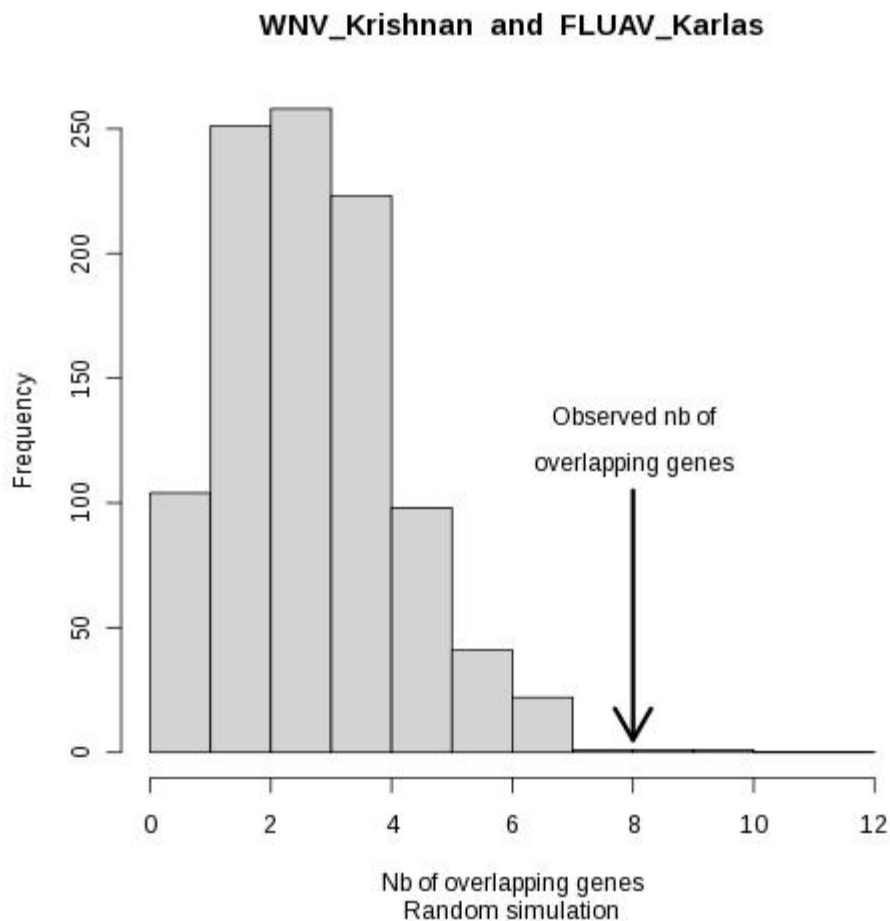

### 54. HCV\_Li vs. FLUAV\_Karlas

HCV\_Li: 19470 genes tested, 262 genes identified

FLUAV\_Karlas: 22843 genes tested, 168 genes identified

Number of overlapping genes: 4

List of overlapping genes: TNFRSF18, FAU, XPNPEP1, SRRM2

Number of simulations showing 4 or more overlapping genes: 138/1000

P-value: 0,138

Random distribution:

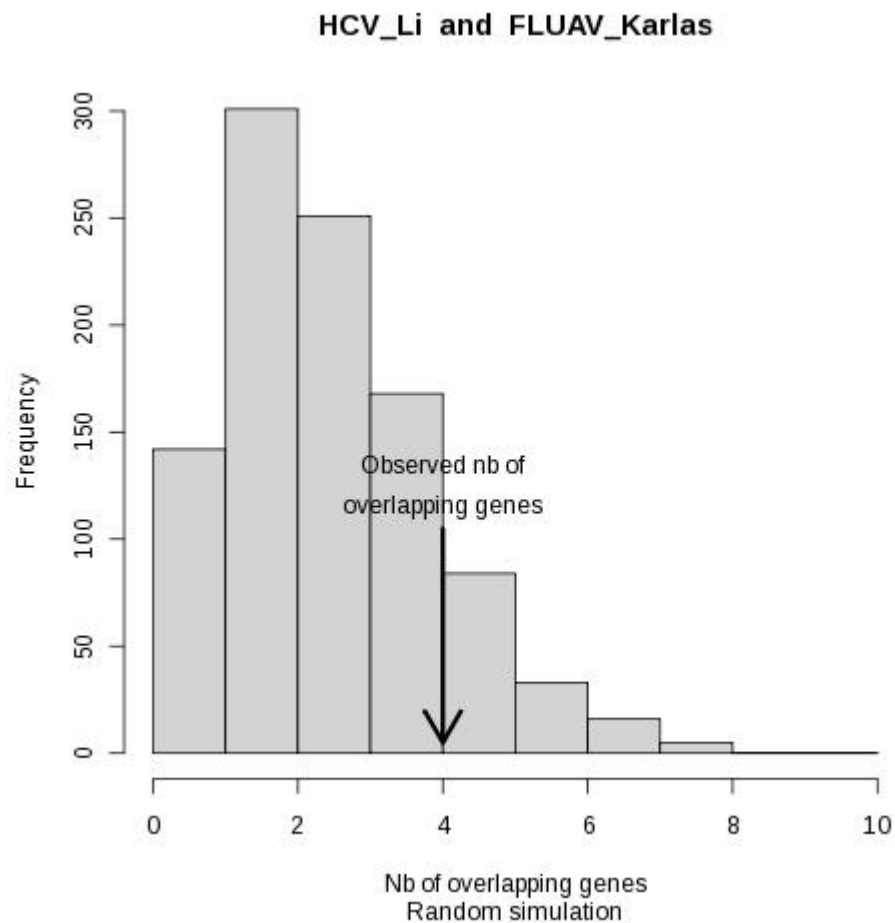

### 55. DV\_Sessions vs. FLUAV\_Karlas

DV\_Sessions: 10278 genes tested, 81 genes identified  
FLUAV\_Karlas: 22843 genes tested, 168 genes identified  
Number of overlapping genes: 3  
List of overlapping genes: RUNX1, PHF2, ATP6VOD1  
Number of simulations showing 3 or more overlapping genes: 21/1000  
P-value: 0,021  
Random distribution:

DV\_Sessions and FLUAV\_Karlas

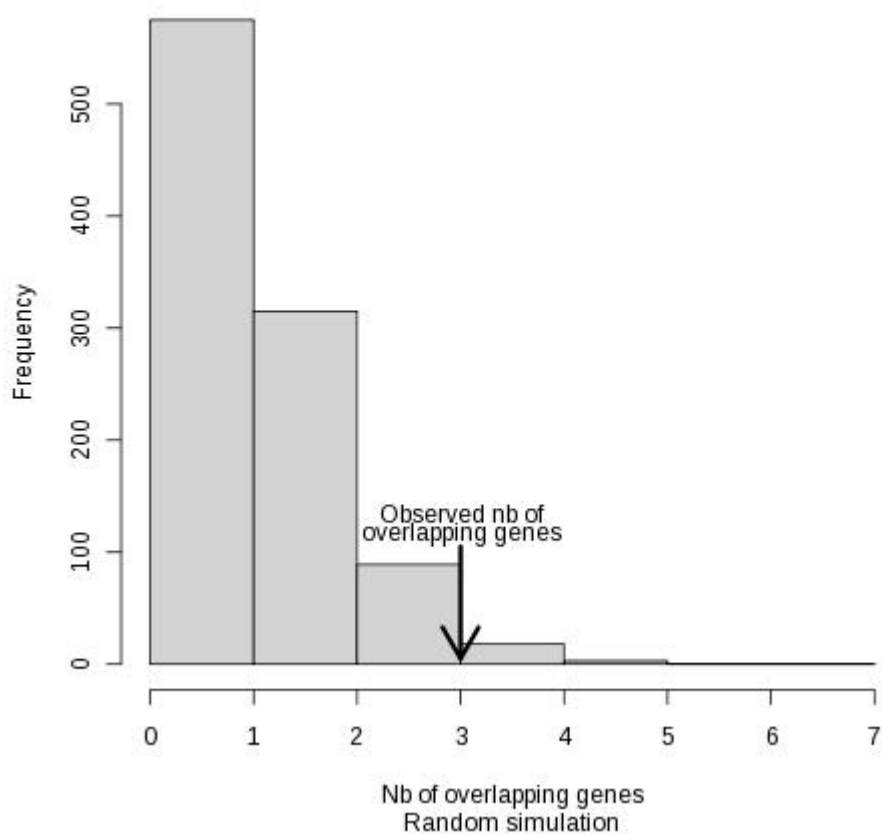

### 56. HCV\_Tai vs. FLUAV\_Karlas

HCV\_Tai: 21094 genes tested, 95 genes identified  
FLUAV\_Karlas: 22843 genes tested, 168 genes identified  
Number of overlapping genes: 5  
List of overlapping genes: COPA, COPB1, COPB2, TBL3, COPG  
Number of simulations showing 5 or more overlapping genes: 0/1000  
P-value: < 0,001  
Random distribution:

HCV\_Tai and FLUAV\_Karlas

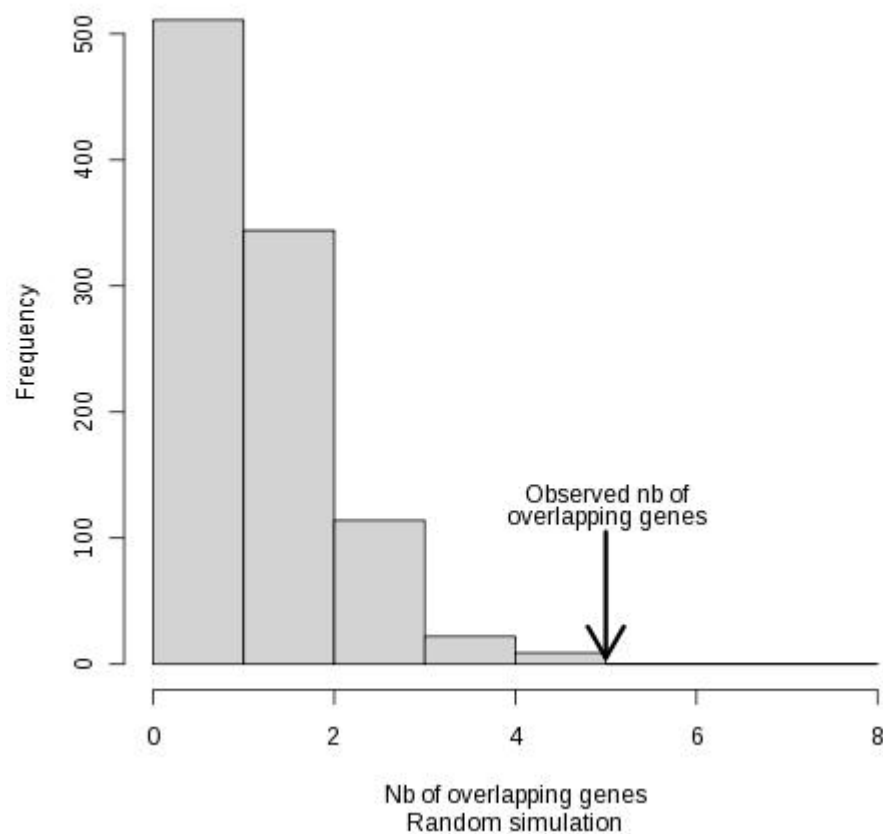



### 57. HIV\_Zhou vs. FLUAV\_Karlas

HIV\_Zhou: 20000 genes tested, 206 genes identified  
FLUAV\_Karlas: 22843 genes tested, 168 genes identified  
Number of overlapping genes: 6  
List of overlapping genes: IL1A, POLR2H, POLR2L, XPO1, MED6, NEK9  
Number of simulations showing 6 or more overlapping genes: 7/1000  
P-value: 0,007  
Random distribution:

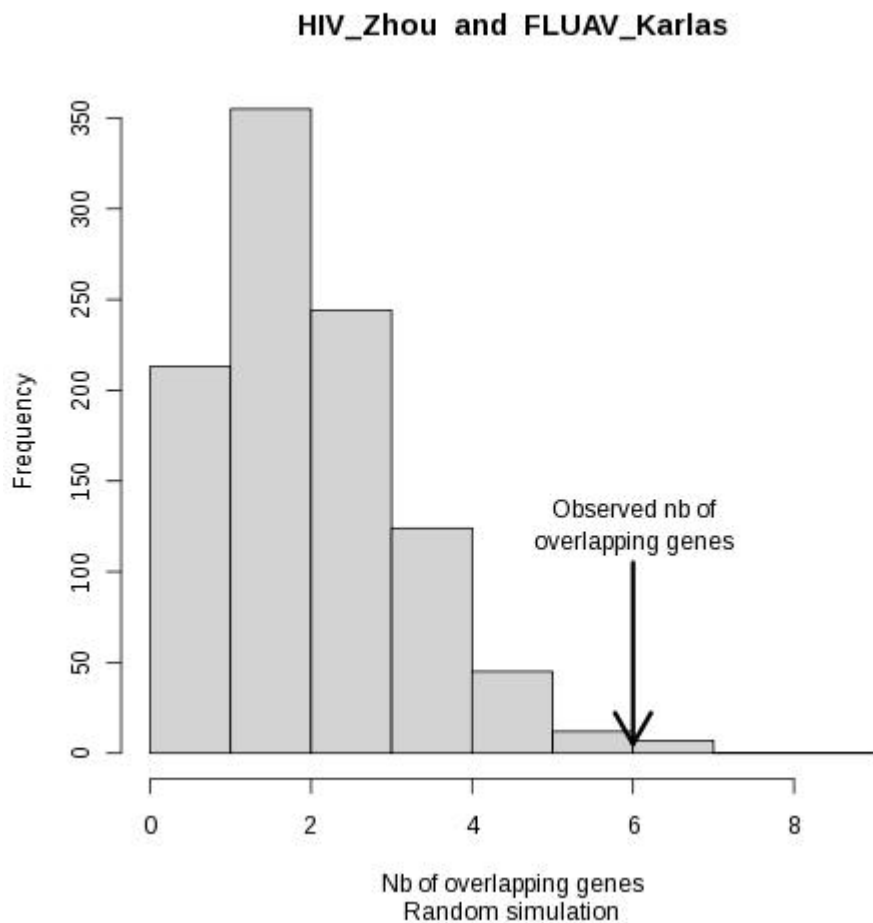

### 58. HIV\_Konig vs. HIV\_Brass

HIV\_Konig: 19628 genes tested, 295 genes identified  
HIV\_Brass: 21121 genes tested, 280 genes identified  
Number of overlapping genes: 13  
List of overlapping genes: DMXL1, IDH1, MAP4, RANBP2, RELA, CTDTP1, MED14, MED7, NUP153, MED6, TNPO3, MID1IP1, TRIM55  
Number of simulations showing 13 or more overlapping genes: 0/1000  
P-value: < 0,001  
Random distribution:

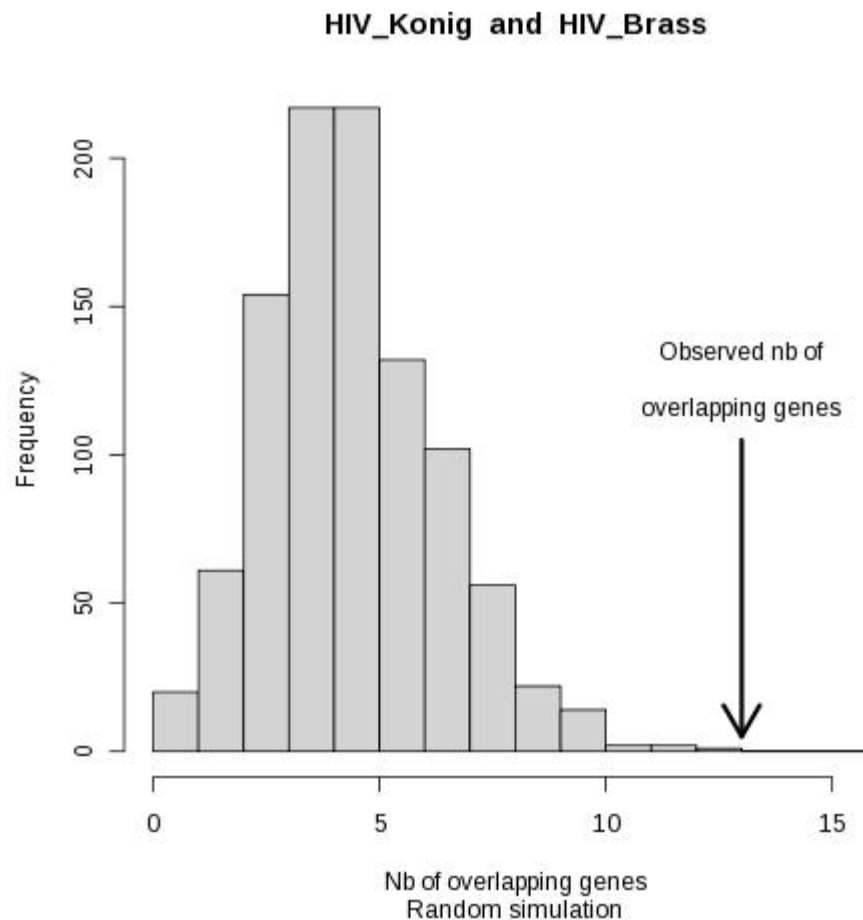

### 59. WNV\_Krishnan vs. HIV\_Brass

WNV\_Krishnan: 21121 genes tested, 305 genes identified  
HIV\_Brass: 21121 genes tested, 280 genes identified  
Number of overlapping genes: 9  
List of overlapping genes: ATP6V0A1, USP6, SCFD1, KLHL1, TRAPPC1, MID1IP1, RFWD2, CRT3, RIMS4  
Number of simulations showing 9 or more overlapping genes: 26/1000  
P-value: 0,026  
Random distribution:

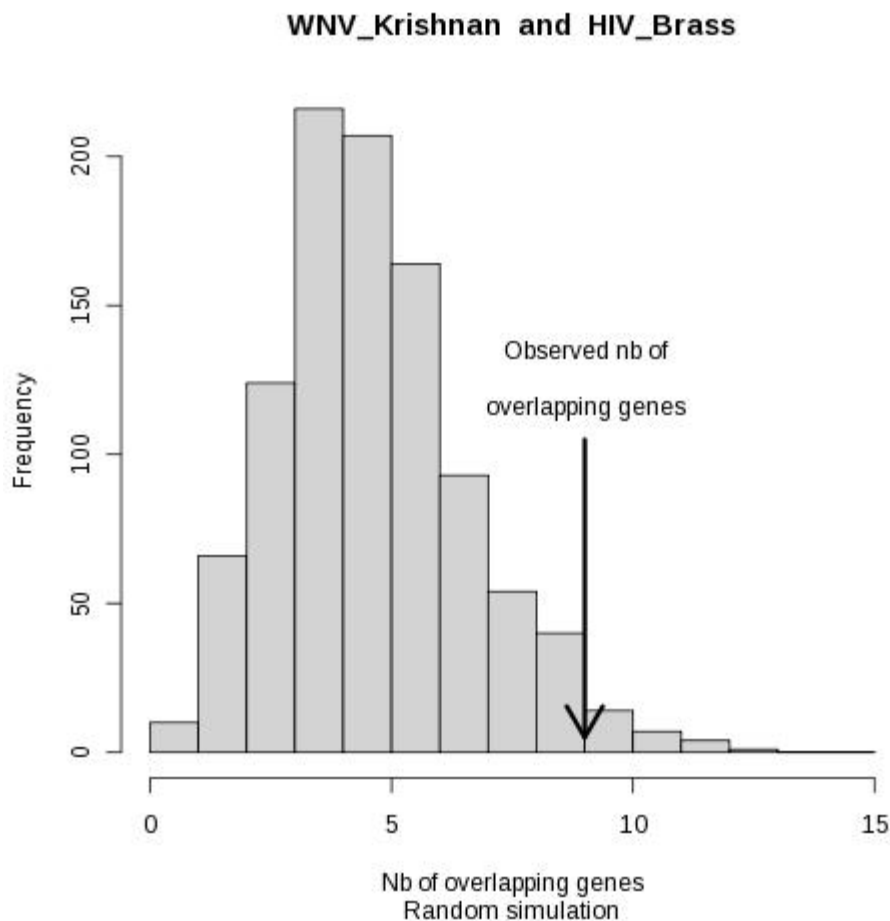

### 60. HCV\_Li vs. HIV\_Brass

HCV\_Li: 19470 genes tested, 262 genes identified  
HIV\_Brass: 21121 genes tested, 280 genes identified  
Number of overlapping genes: 11  
List of overlapping genes: DDOST, DDX3X, ETF1, DNAJB1, MAP4, NMT1, RABEPK, SUV420H1, HEATR1, SPCS3, RGP5  
Number of simulations showing 11 or more overlapping genes: 1/1000  
P-value: 0,001  
Random distribution:

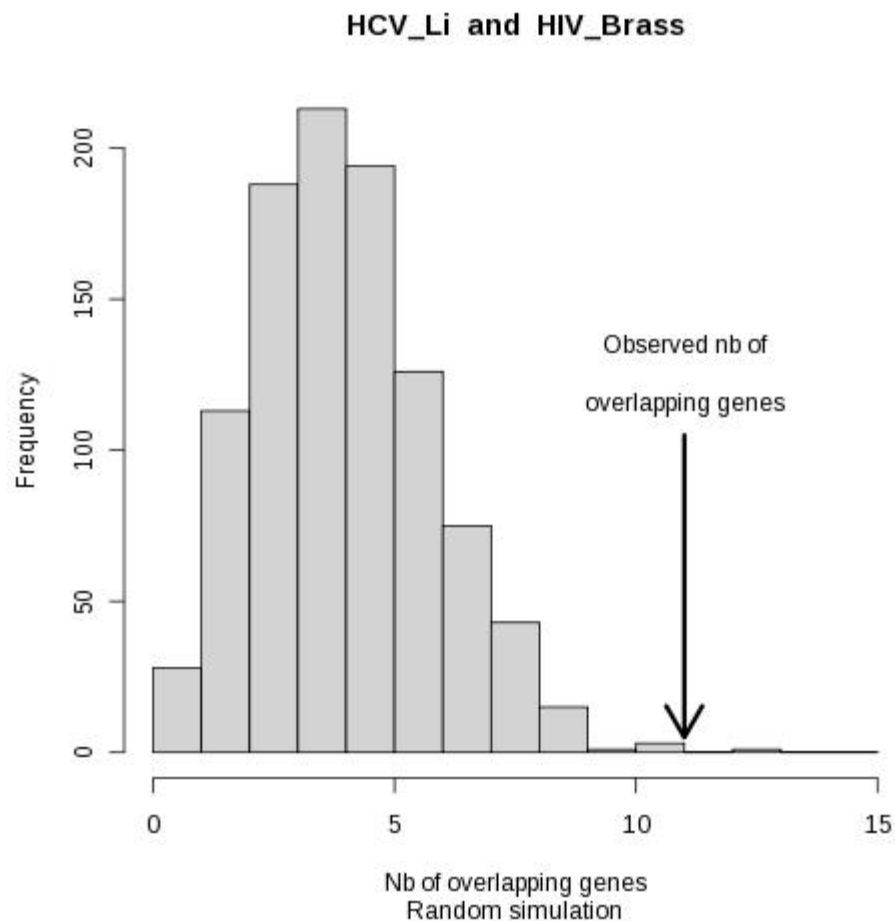

## 61. DV\_Sessions vs. HIV\_Brass

DV\_Sessions: 10278 genes tested, 81 genes identified  
HIV\_Brass: 21121 genes tested, 280 genes identified  
Number of overlapping genes: 0  
List of overlapping genes: none  
Number of simulations showing 0 or more overlapping genes: 1000/1000  
P-value: 1  
Random distribution:

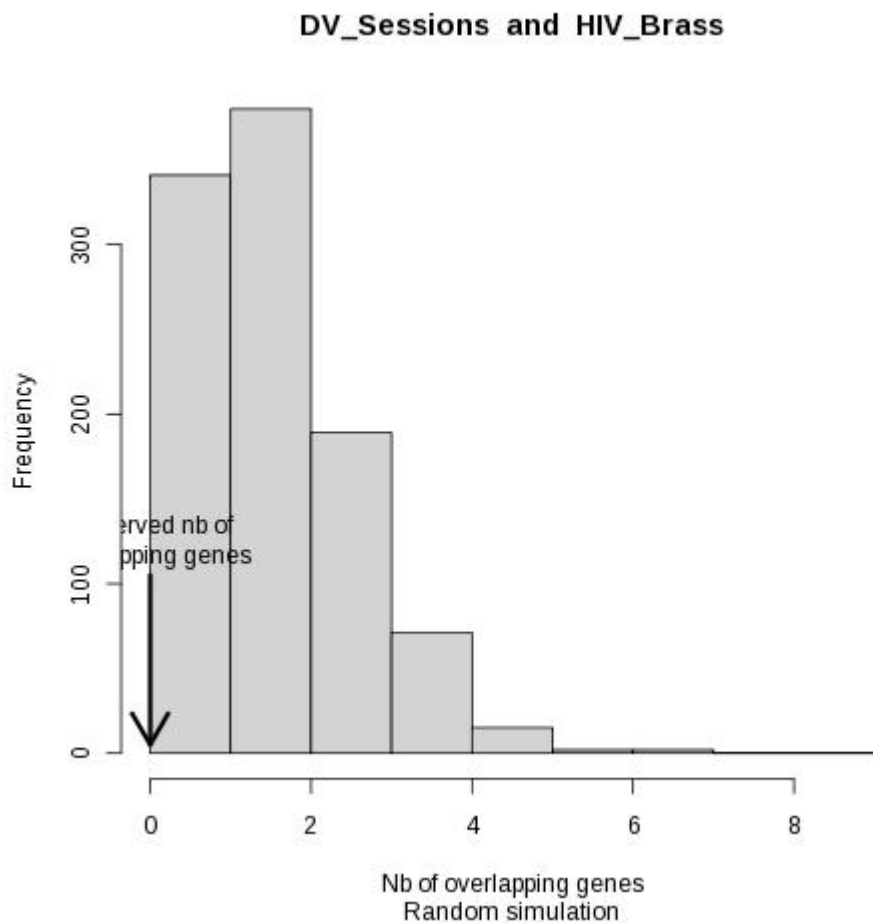

## 62. HCV\_Tai vs. HIV\_Brass

HCV\_Tai: 21094 genes tested, 95 genes identified  
HIV\_Brass: 21121 genes tested, 280 genes identified  
Number of overlapping genes: 2  
List of overlapping genes: CACNG1, RABEPK  
Number of simulations showing 2 or more overlapping genes: 357/1000  
P-value: 0,357  
Random distribution:

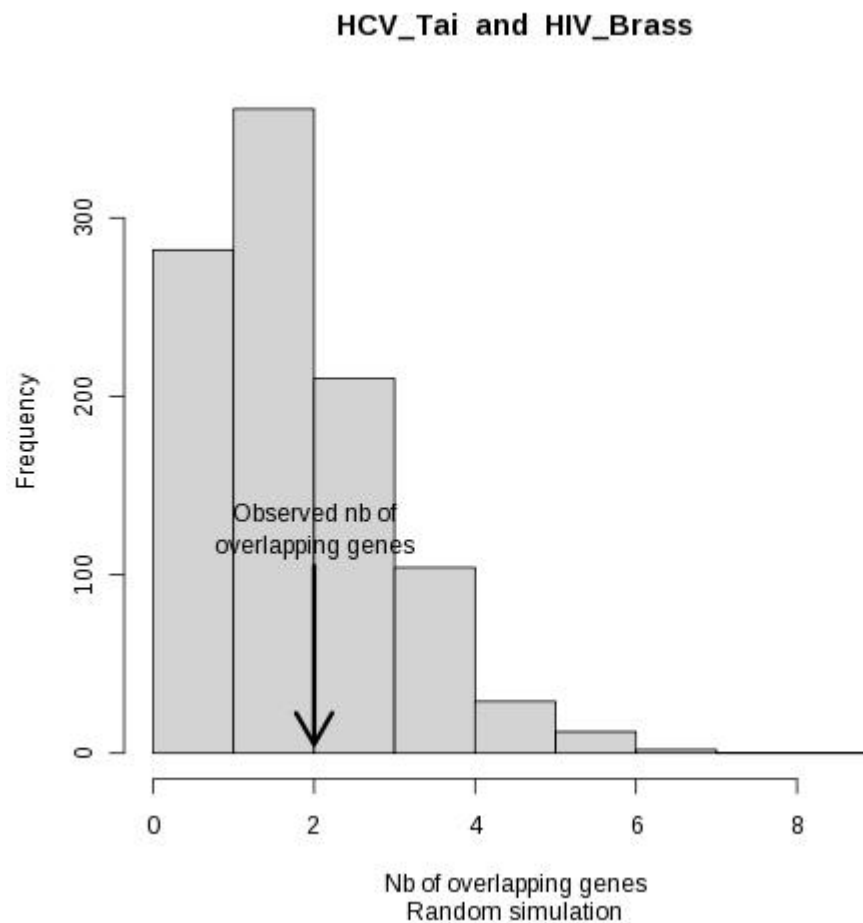

### 63. HIV\_Zhou vs. HIV\_Brass

HIV\_Zhou: 20000 genes tested, 206 genes identified

HIV\_Brass: 21121 genes tested, 280 genes identified

Number of overlapping genes: 14

List of overlapping genes: AKT1, CD4, DDX3X, JAK1, RELA, TCEB3, CXCR4, RAB28, MED7, MED6, MED4, WNK1, RNF26, MED28

Number of simulations showing 14 or more overlapping genes: 0/1000

P-value: 0,000

Random distribution:

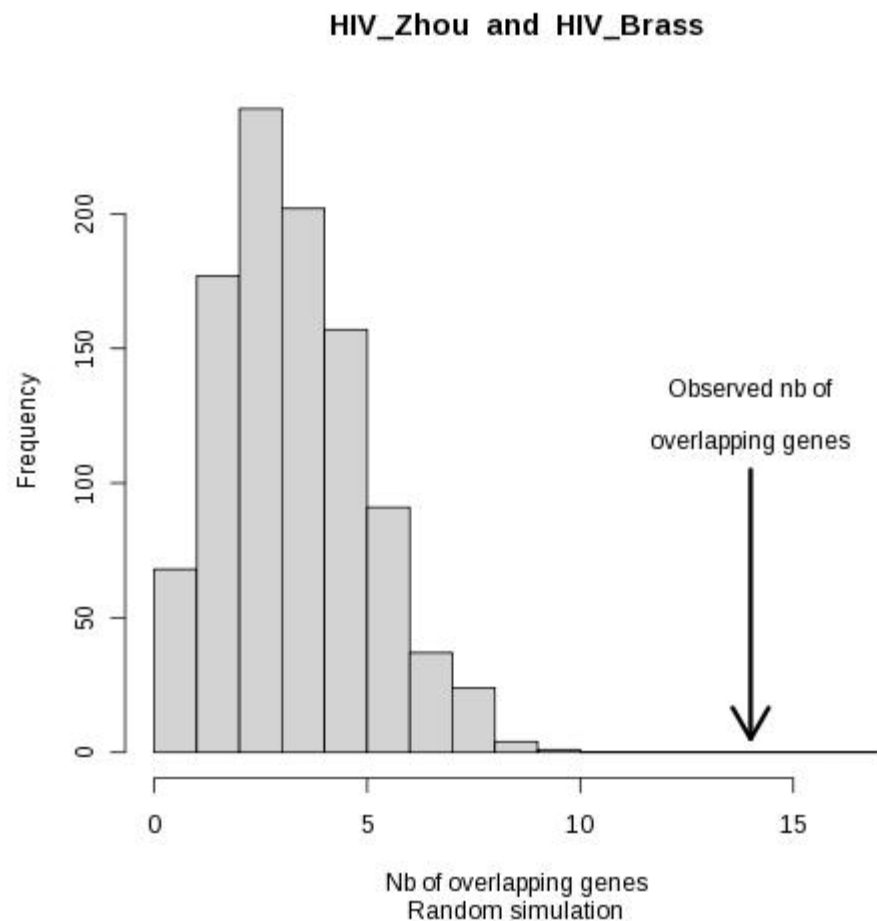

### 64. WNV\_Krishnan vs. HIV\_Konig

WNV\_Krishnan: 21121 genes tested, 305 genes identified

HIV\_Konig: 19628 genes tested, 295 genes identified

Number of overlapping genes: 8

List of overlapping genes: ATP6V0C, DHX15, MT2A, NUMBL, RBM5, XAB2, MID1IP1, NDFIP1

Number of simulations showing 8 or more overlapping genes: 55/1000

P-value: 0,055

Random distribution:

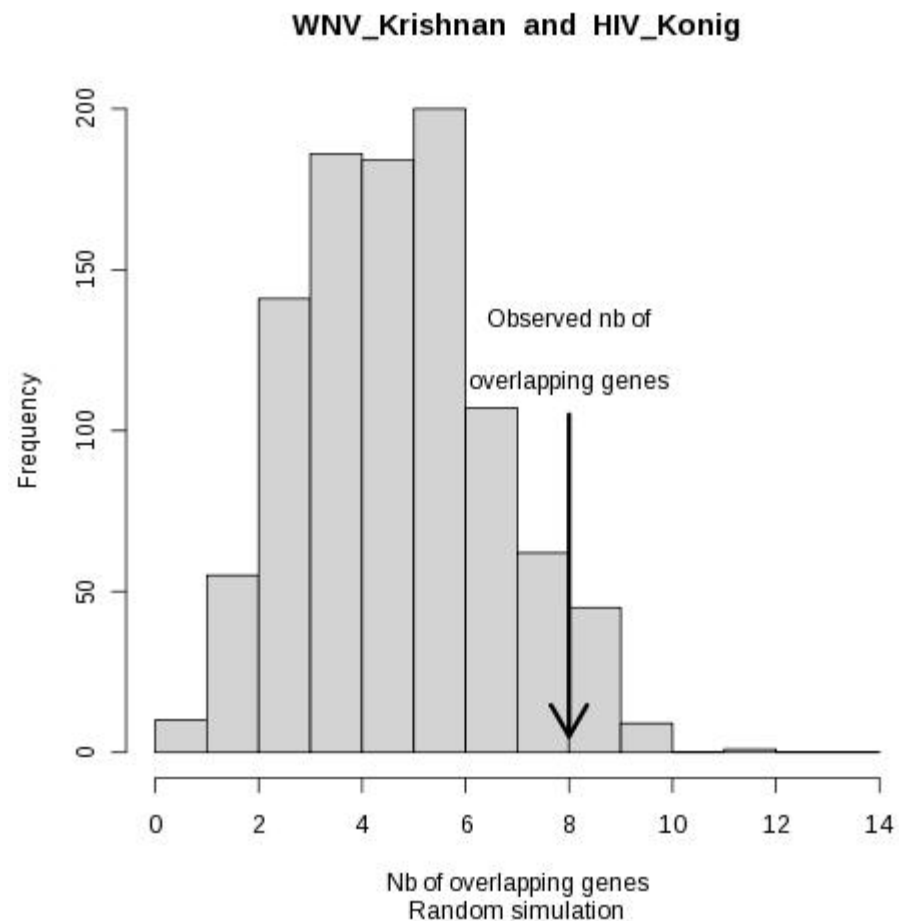

## 65. HCV\_Li vs. HIV\_Konig

HCV\_Li: 19470 genes tested, 262 genes identified  
HIV\_Konig: 19628 genes tested, 295 genes identified  
Number of overlapping genes: 5  
List of overlapping genes: ERCC5, MAP4, ZNF148, DLGAP4, MYOF  
Number of simulations showing 5 or more overlapping genes: 359/1000  
P-value: 0,359  
Random distribution:

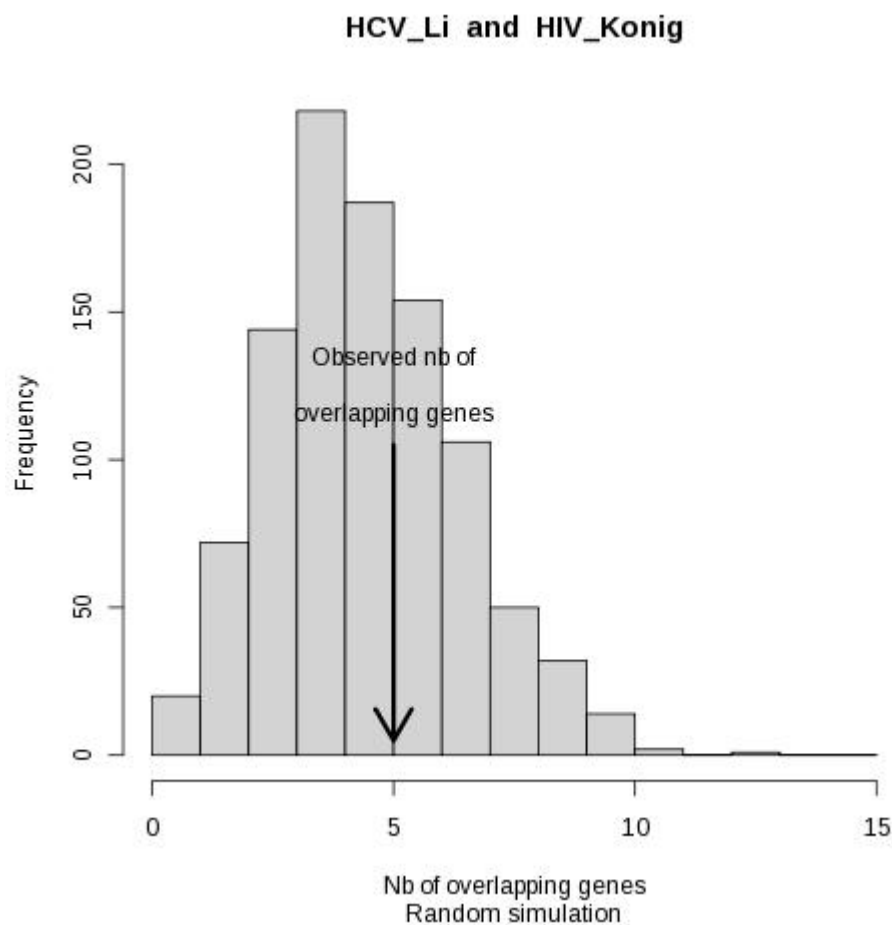

## 66. DV\_Sessions vs. HIV\_Konig

DV\_Sessions: 10278 genes tested, 81 genes identified  
HIV\_Konig: 19628 genes tested, 295 genes identified  
Number of overlapping genes: 4  
List of overlapping genes: PHF2, RREB1, GANAB, AMDHD2  
Number of simulations showing 4 or more overlapping genes: 43/1000  
P-value: 0,043  
Random distribution:

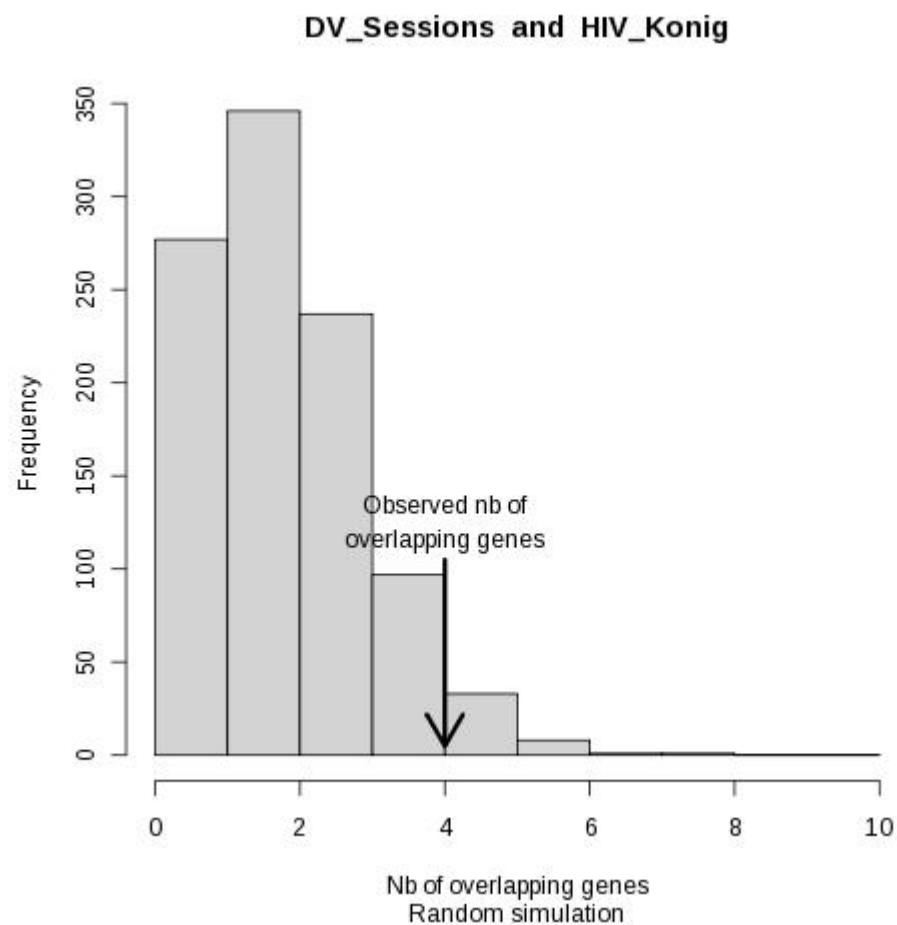

## 67. HCV\_Tai vs. HIV\_Konig

HCV\_Tai: 21094 genes tested, 95 genes identified  
HIV\_Konig: 19628 genes tested, 295 genes identified  
Number of overlapping genes: 3  
List of overlapping genes: ERCC1, NCOA6, COASY  
Number of simulations showing 3 or more overlapping genes: 161/1000  
P-value: 0,161  
Random distribution:

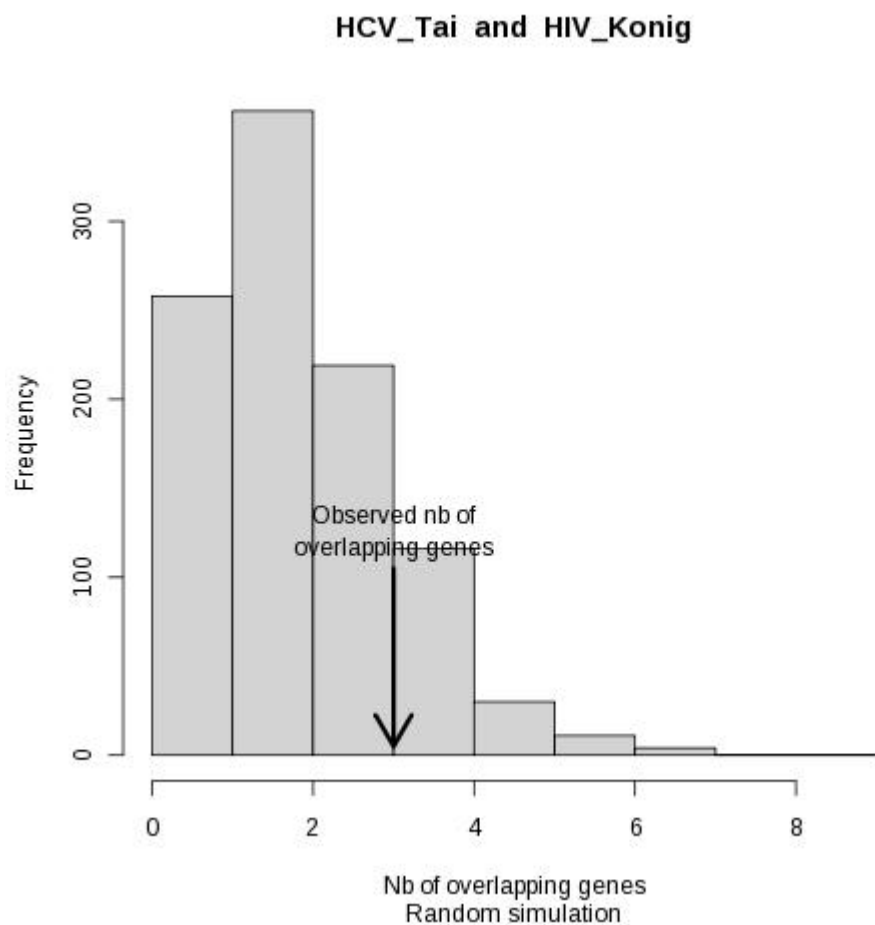

## 68. HIV\_Zhou vs. HIV\_Konig

HIV\_Zhou: 20000 genes tested, 206 genes identified  
HIV\_Konig: 19628 genes tested, 295 genes identified  
Number of overlapping genes: 8  
List of overlapping genes: ADRBK1, RELA, CHST1, MED7, MED6, ANAPC2, MED19, HMCN2  
Number of simulations showing 8 or more overlapping genes: 15/1000  
P-value: 0,015  
Random distribution:

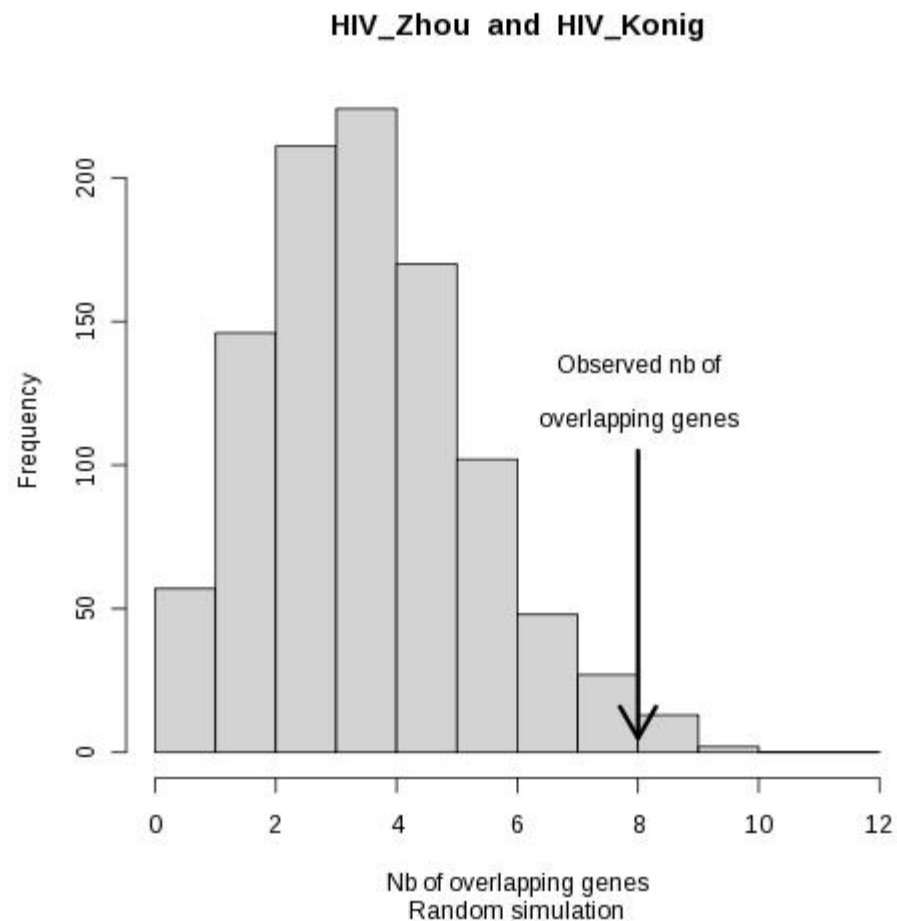

## 69. HCV\_Li vs. WNV\_Krishnan

HCV\_Li: 19470 genes tested, 262 genes identified

WNV\_Krishnan: 21121 genes tested, 305 genes identified

Number of overlapping genes: 7

List of overlapping genes: IRF3, BCKDHA, USP11, NOP56, RBM22, ZNF608, RPS6KL1

Number of simulations showing 7 or more overlapping genes: 75/1000

P-value: 0,075

Random distribution:

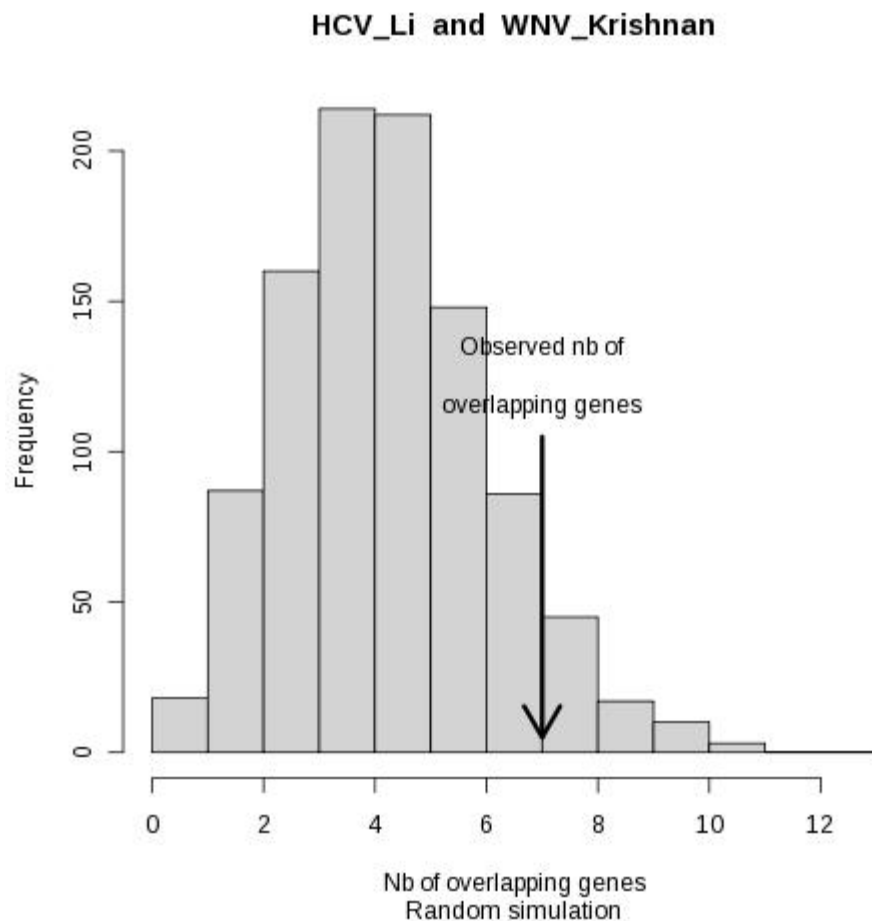

## 70. DV\_Sessions vs. WNV\_Krishnan

DV\_Sessions: 10278 genes tested, 81 genes identified

WNV\_Krishnan: 21121 genes tested, 305 genes identified

Number of overlapping genes: 2

List of overlapping genes: ATP6V0B, ATP6VOD1

Number of simulations showing 2 or more overlapping genes: 322/1000

P-value: 0,322

Random distribution:

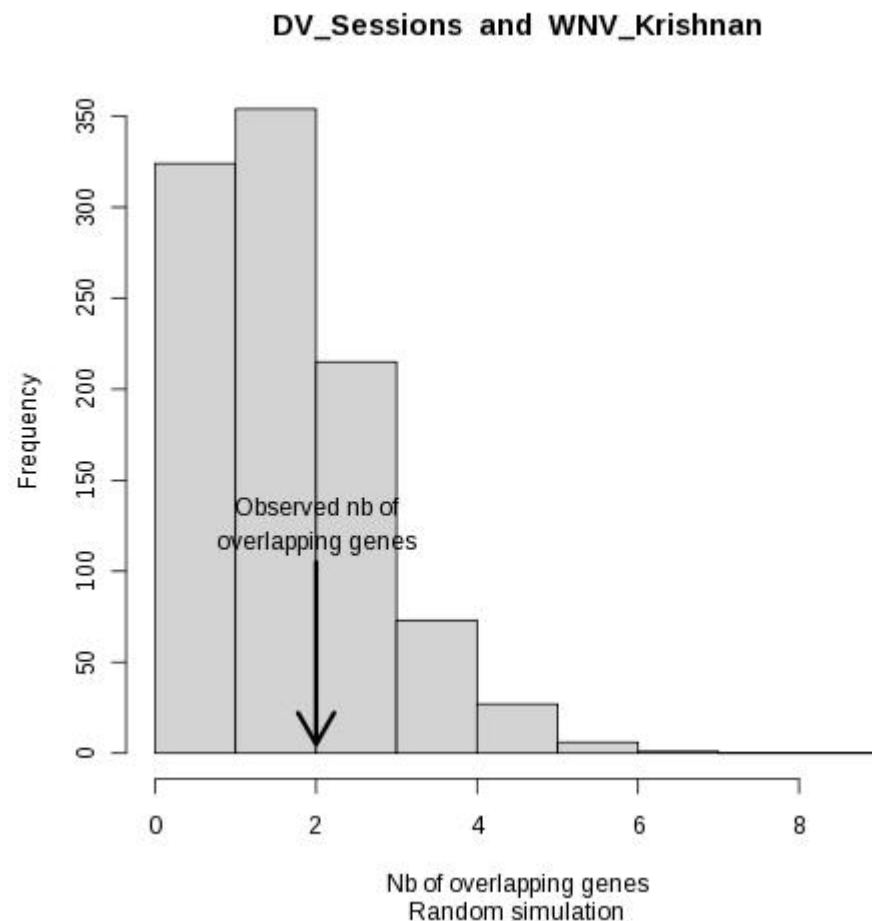

## 71. HCV\_Tai vs. WNV\_Krishnan

HCV\_Tai: 21094 genes tested, 95 genes identified  
WNV\_Krishnan: 21121 genes tested, 305 genes identified  
Number of overlapping genes: 1  
List of overlapping genes: IL4I1  
Number of simulations showing 1 or more overlapping genes: 754/1000  
P-value: 0,754  
Random distribution:

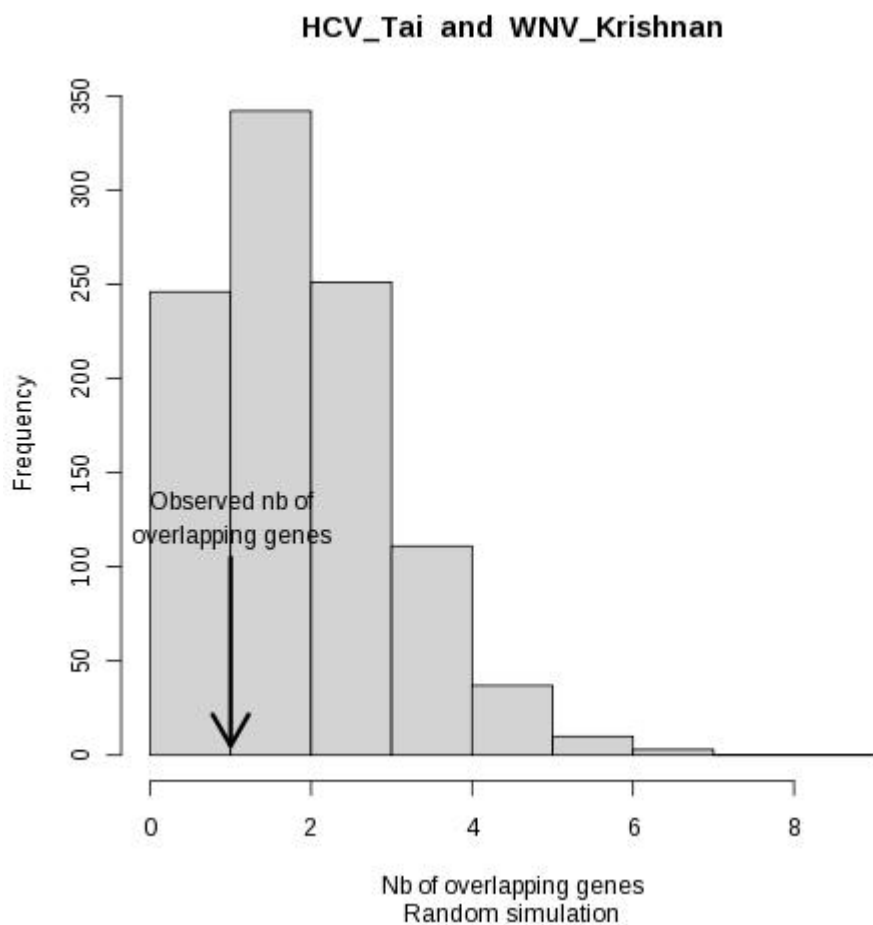

## 72. HIV\_Zhou vs. WNV\_Krishnan

HIV\_Zhou: 20000 genes tested, 206 genes identified  
WNV\_Krishnan: 21121 genes tested, 305 genes identified  
Number of overlapping genes: 2  
List of overlapping genes: SEC61G, KIF17  
Number of simulations showing 2 or more overlapping genes: 783/1000  
P-value: 0,783  
Random distribution:

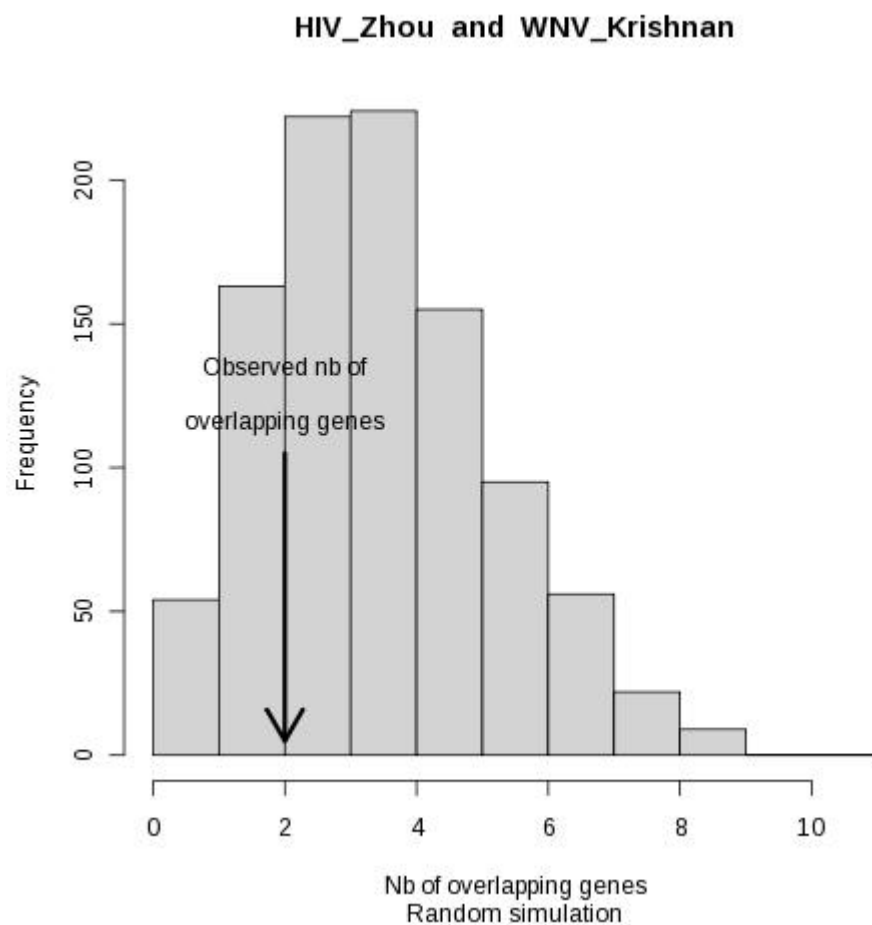



### 73. DV\_Sessions vs. HCV\_Li

DV\_Sessions: 10278 genes tested, 81 genes identified  
HCV\_Li: 19470 genes tested, 262 genes identified  
Number of overlapping genes: 2  
List of overlapping genes: DOCK3, CNOT2  
Number of simulations showing 2 or more overlapping genes: 306/1000  
P-value: 0,306  
Random distribution:

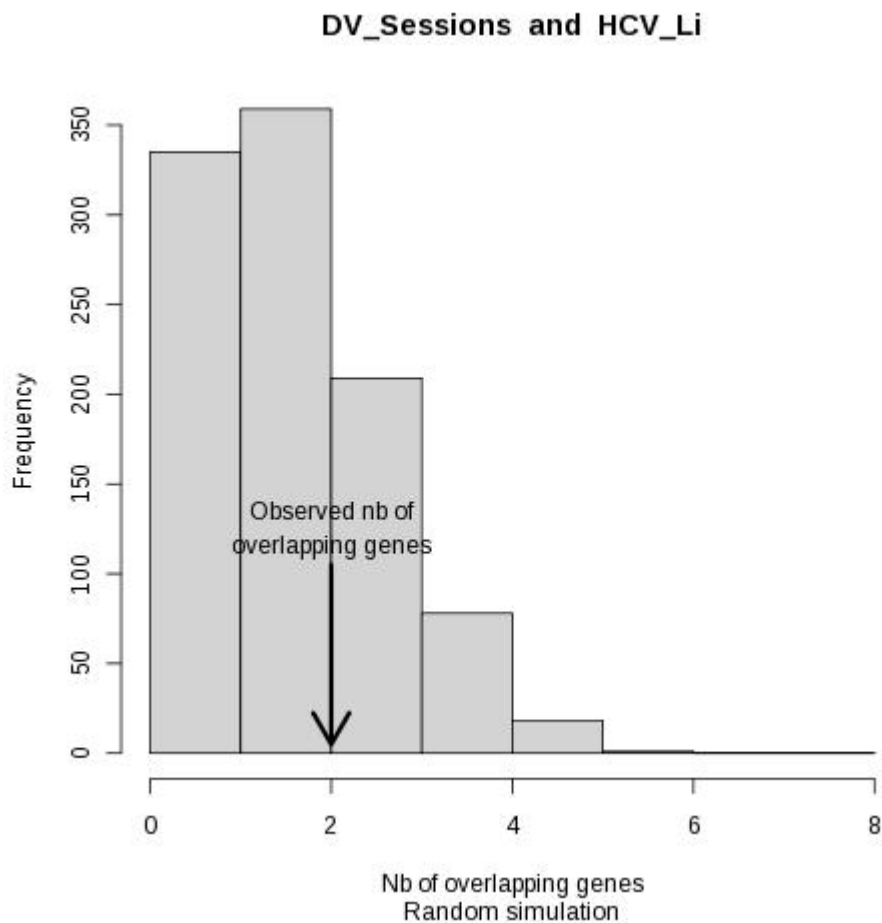

### 74. HCV\_Tai vs. HCV\_Li

HCV\_Tai: 21094 genes tested, 95 genes identified  
HCV\_Li: 19470 genes tested, 262 genes identified  
Number of overlapping genes: 7  
List of overlapping genes: ITGA7, PI4KA, CTSF, RABEPK, NOP58, TRIM62, NUAK2  
Number of simulations showing 7 or more overlapping genes: 1/1000  
P-value: 0,001  
Random distribution:

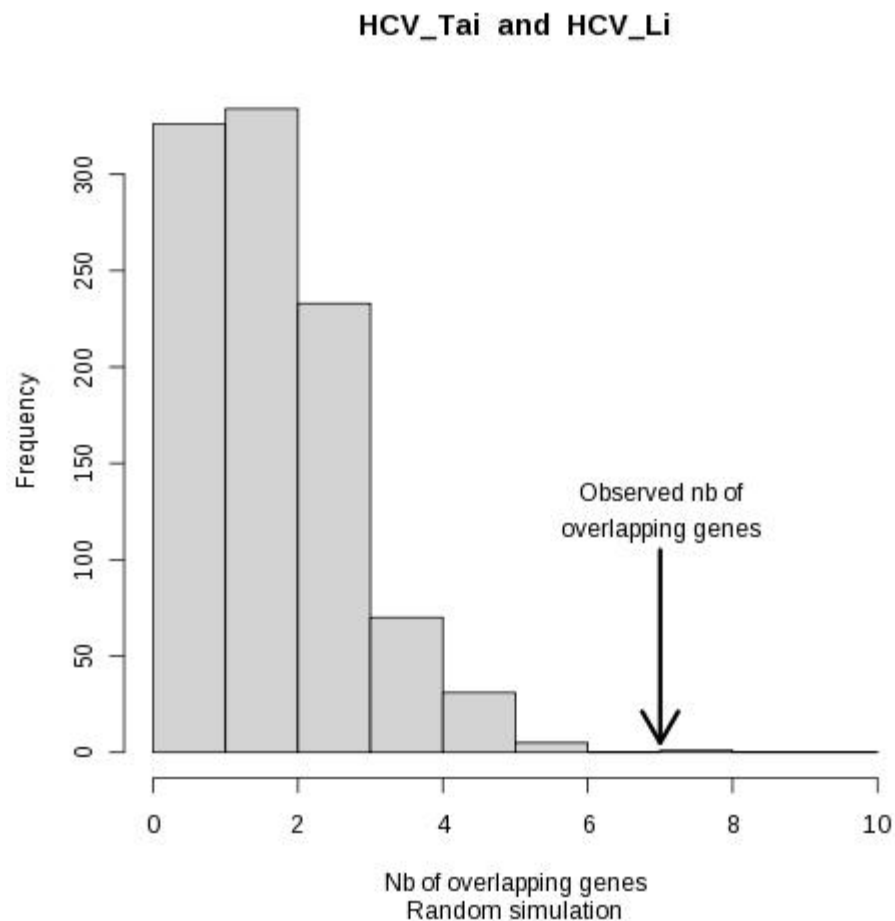

## 75. HIV\_Zhou vs. HCV\_Li

HIV\_Zhou: 20000 genes tested, 206 genes identified

HCV\_Li: 19470 genes tested, 262 genes identified

Number of overlapping genes: 5

List of overlapping genes: DDX3X, PI4KA, PTH1R, TECR, PELI1

Number of simulations showing 5 or more overlapping genes: 125/1000

P-value: 0,125

Random distribution:

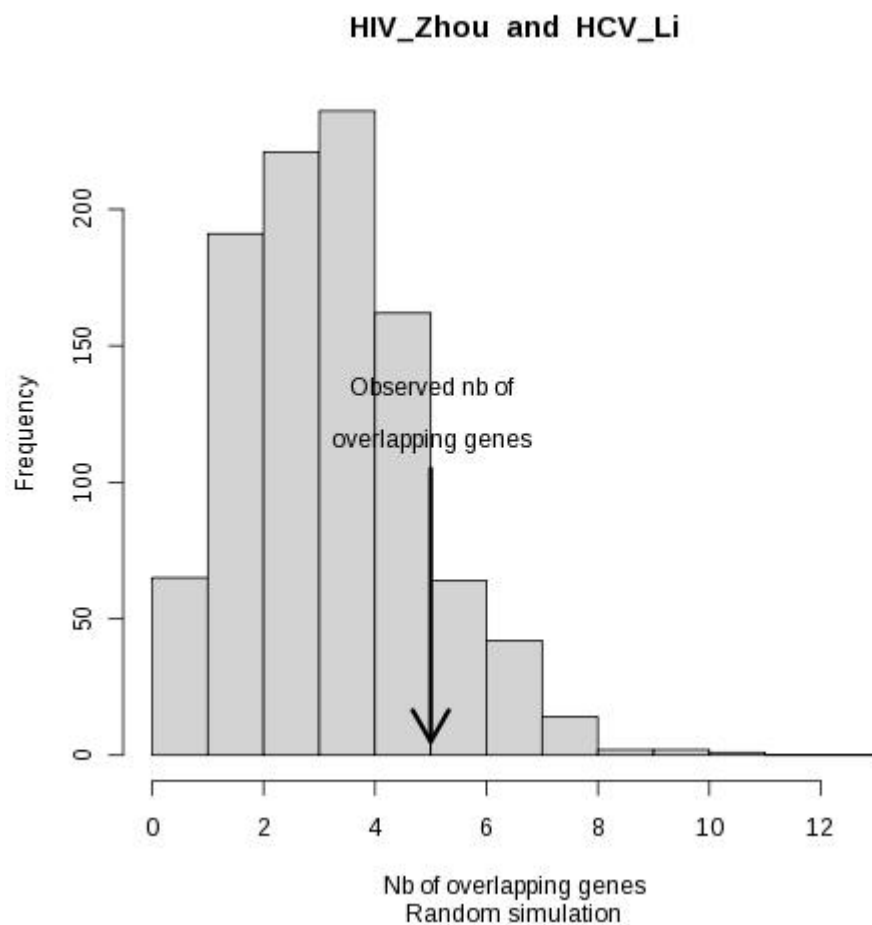

## 76. HCV\_Tai vs. DV\_Sessions

HCV\_Tai: 21094 genes tested, 95 genes identified

DV\_Sessions: 10278 genes tested, 81 genes identified

Number of overlapping genes: 1

List of overlapping genes: CBX1

Number of simulations showing 1 or more overlapping genes: 334/1000

P-value: 0,334

Random distribution:

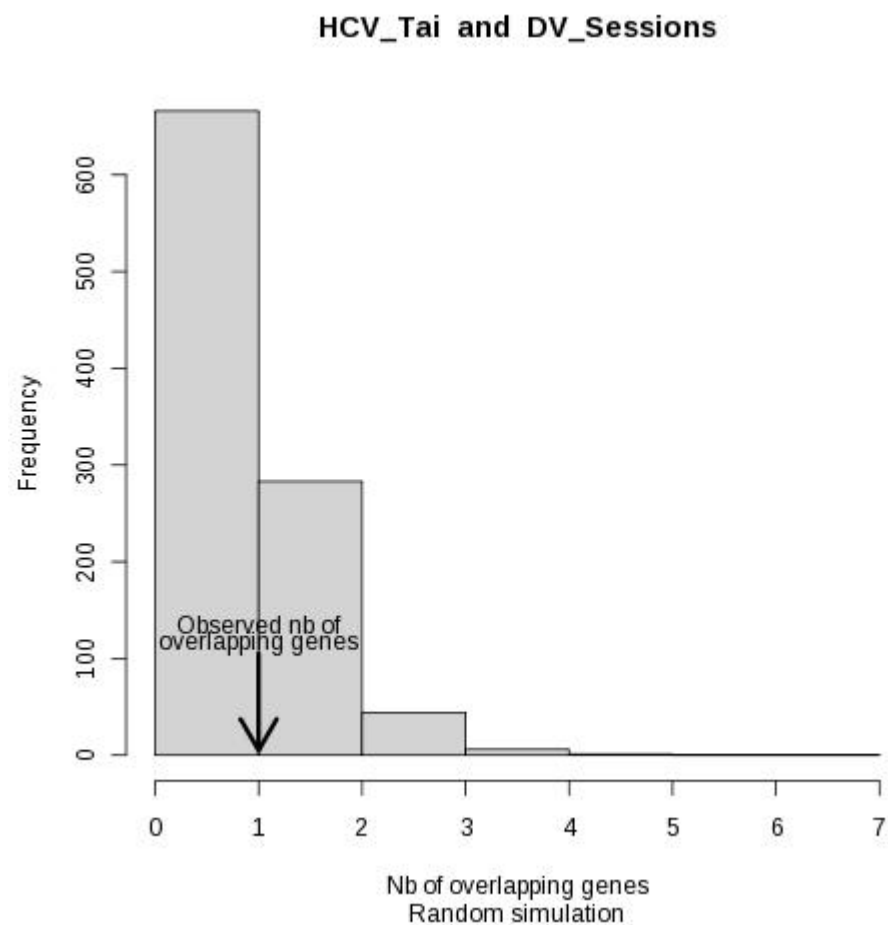

## 77. HIV\_Zhou vs. DV\_Sessions

HIV\_Zhou: 20000 genes tested, 206 genes identified  
DV\_Sessions: 10278 genes tested, 81 genes identified  
Number of overlapping genes: 0  
List of overlapping genes: none  
Number of simulations showing 0 or more overlapping genes: 1000/1000  
P-value: 1  
Random distribution:

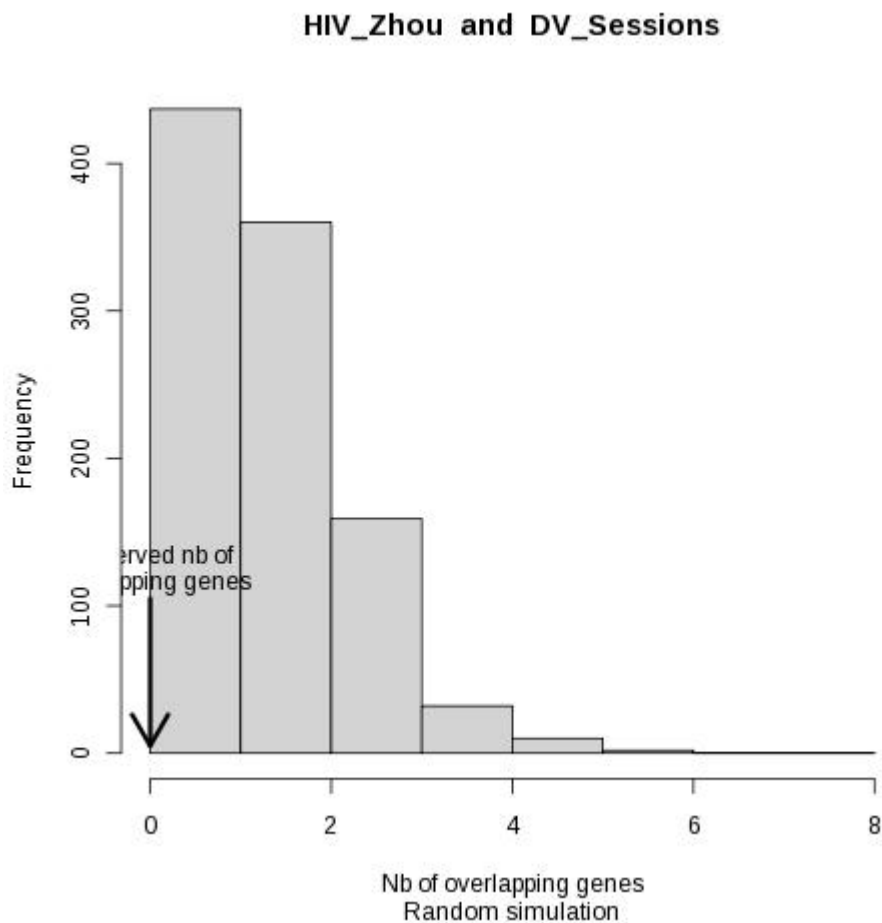

## 78. HIV\_Zhou vs. HCV\_Tai

HIV\_Zhou: 20000 genes tested, 206 genes identified  
HCV\_Tai: 21094 genes tested, 95 genes identified  
Number of overlapping genes: 3  
List of overlapping genes: PI4KA, MAP3K14, THAP11  
Number of simulations showing 3 or more overlapping genes: 72/1000  
P-value: 0,072  
Random distribution:

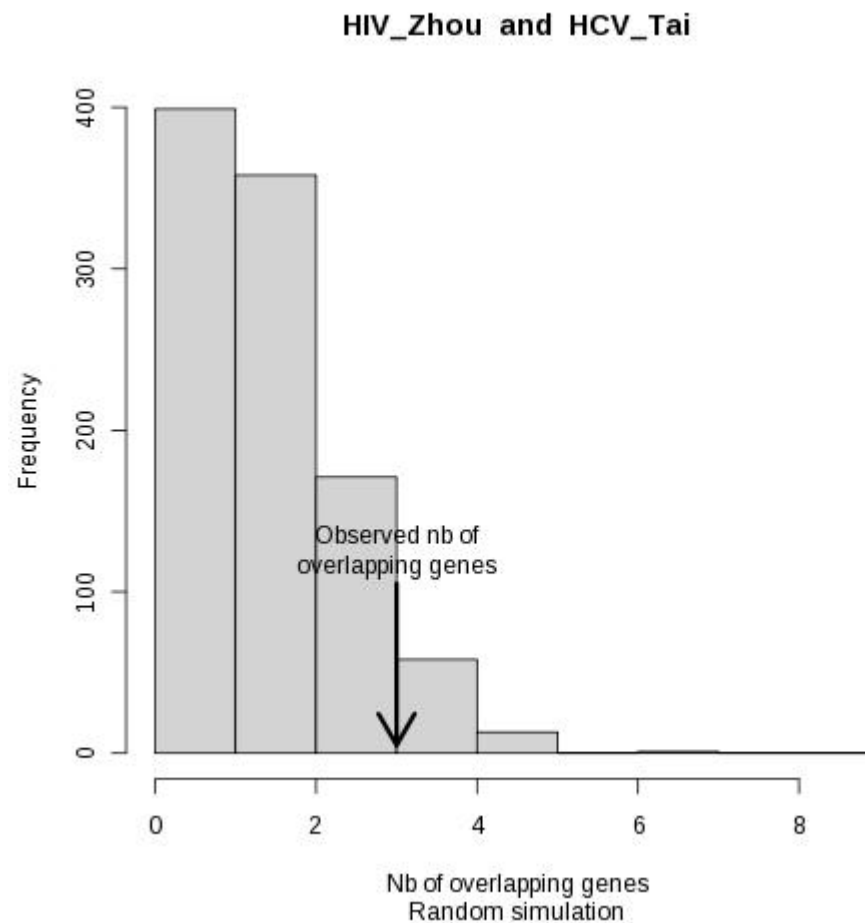

## 79. FLUAV\_interactors vs. FLUAV\_Konig

FLUAV\_interactors: 25157 genes tested, 145 genes identified

FLUAV\_Konig: 19628 genes tested, 295 genes identified

Number of overlapping genes: 5

List of overlapping genes: HSP90AA1, EIF2AK2, STX5, SUMO1, PTPMT1

Number of simulations showing 5 or more overlapping genes: 30/1000

P-value: 0,030

Random distribution:

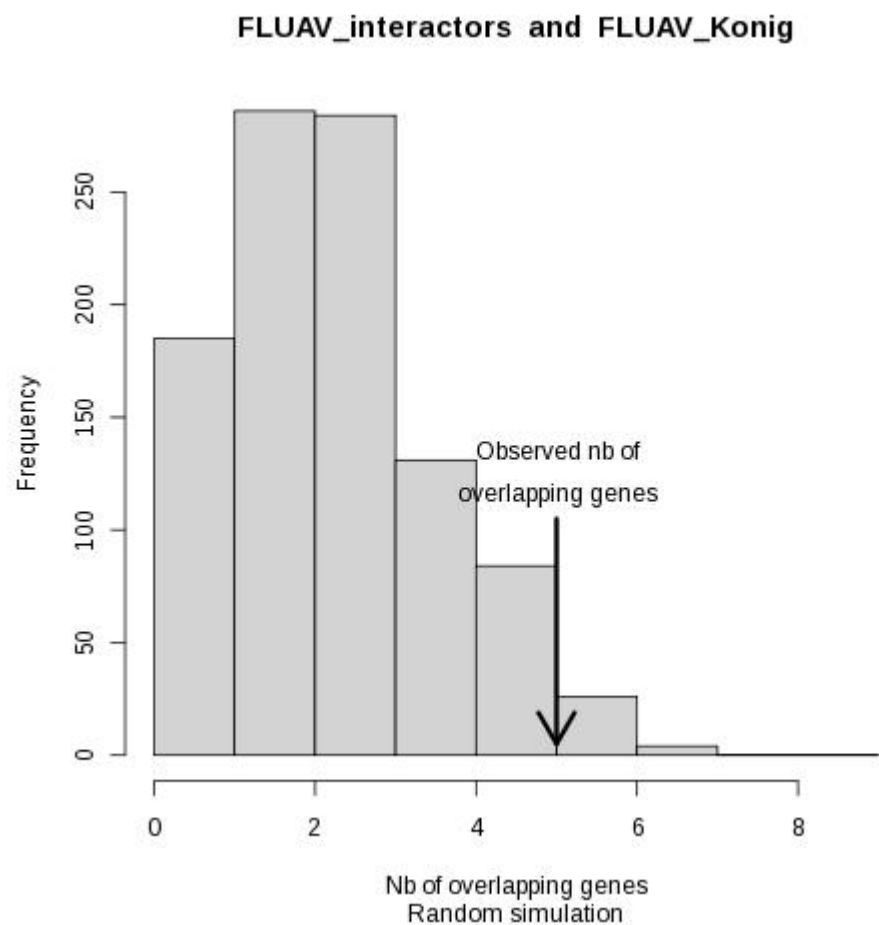

## 80. FLUAV\_interactors vs. FLUAV\_Brass

FLUAV\_interactors: 25157 genes tested, 145 genes identified

FLUAV\_Brass: 17877 genes tested, 133 genes identified

Number of overlapping genes: 1

List of overlapping genes: NXF1

Number of simulations showing 1 or more overlapping genes: 558/1000

P-value: 0,558

Random distribution:

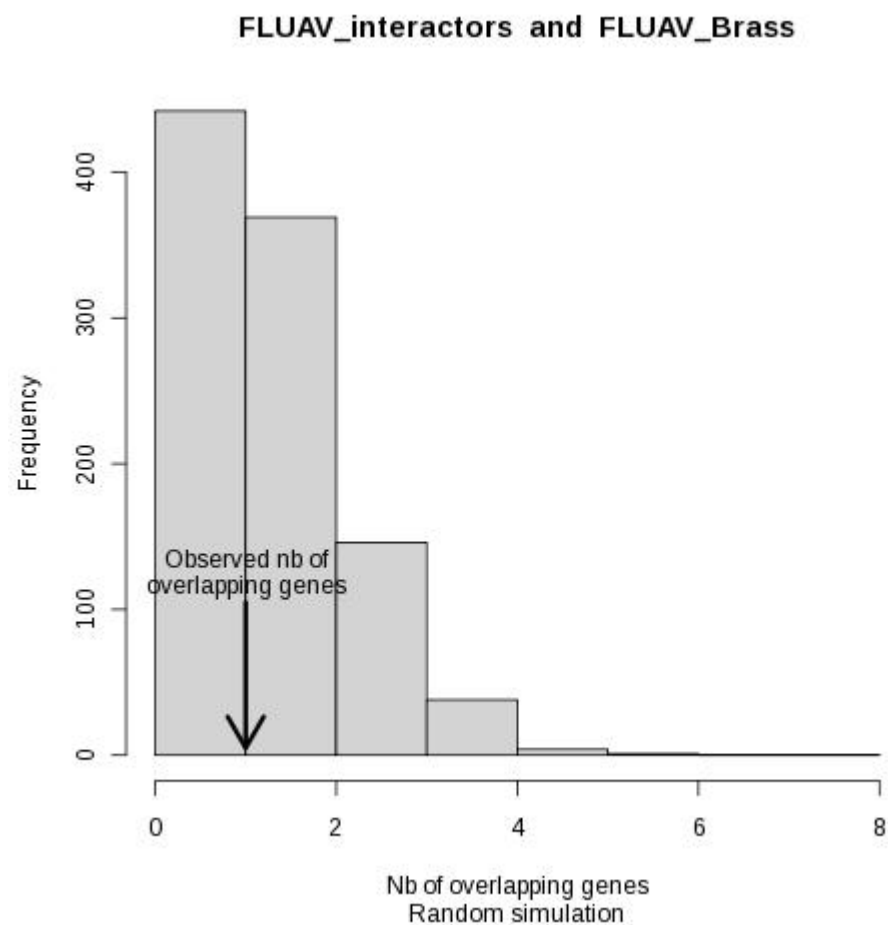

## 81. FLUAV\_interactors vs. FLUAV\_Shapira

FLUAV\_interactors: 25157 genes tested, 145 genes identified

FLUAV\_Shapira: 1745 genes tested, 242 genes identified

Number of overlapping genes: 8

List of overlapping genes: PIK3R2, TRIM27, NXF1, ZMAT4, LZTS2, HLA-B, TTC12, USHBP1

Number of simulations showing 8 or more overlapping genes: 0/1000

P-value: < 0,001

Random distribution:

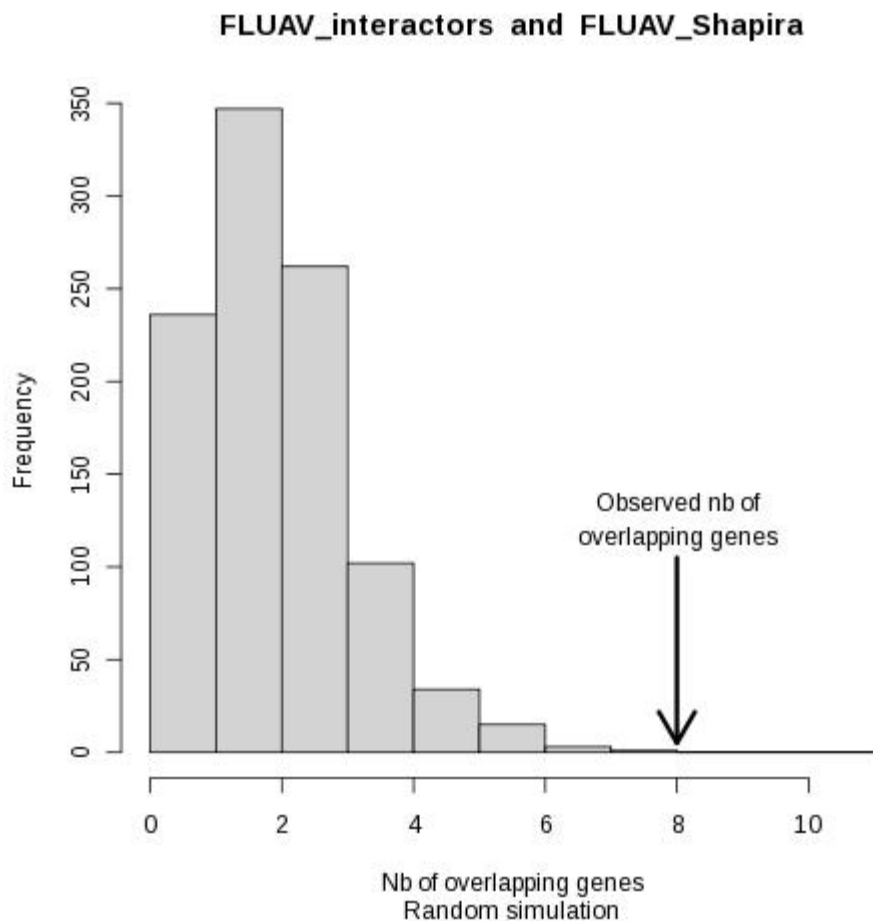

## 82. FLUAV\_interactors vs. FLUAV\_Hao

FLUAV\_interactors: 25157 genes tested, 145 genes identified

FLUAV\_Hao: 10278 genes tested, 78 genes identified

Number of overlapping genes: 2

List of overlapping genes: HSPA8, NXF1

Number of simulations showing 2 or more overlapping genes: 75/1000

P-value: 0,075

Random distribution:

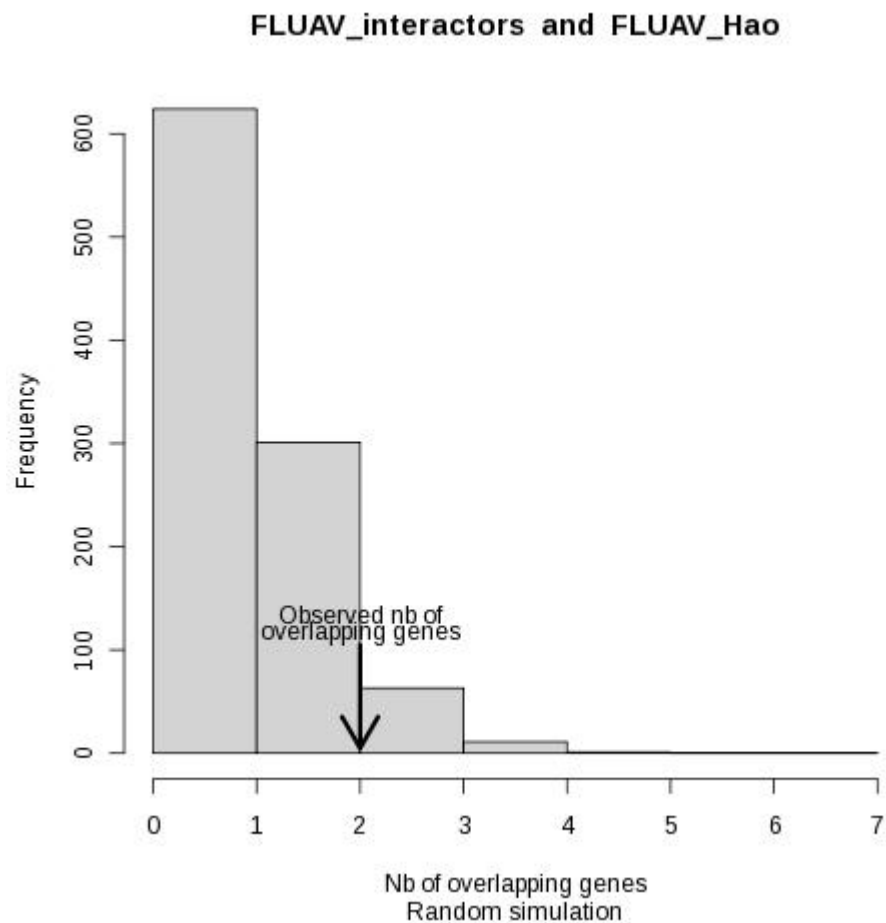

### 83. *FLUAV\_interactors* vs. *FLUAV\_Sui*

*FLUAV\_interactors*: 25157 genes tested, 145 genes identified

*FLUAV\_Sui*: 25157 genes tested, 99 genes identified

Number of overlapping genes: 1

List of overlapping genes: DDX58

Number of simulations showing 1 or more overlapping genes: 423/1000

P-value: 0,423

Random distribution:

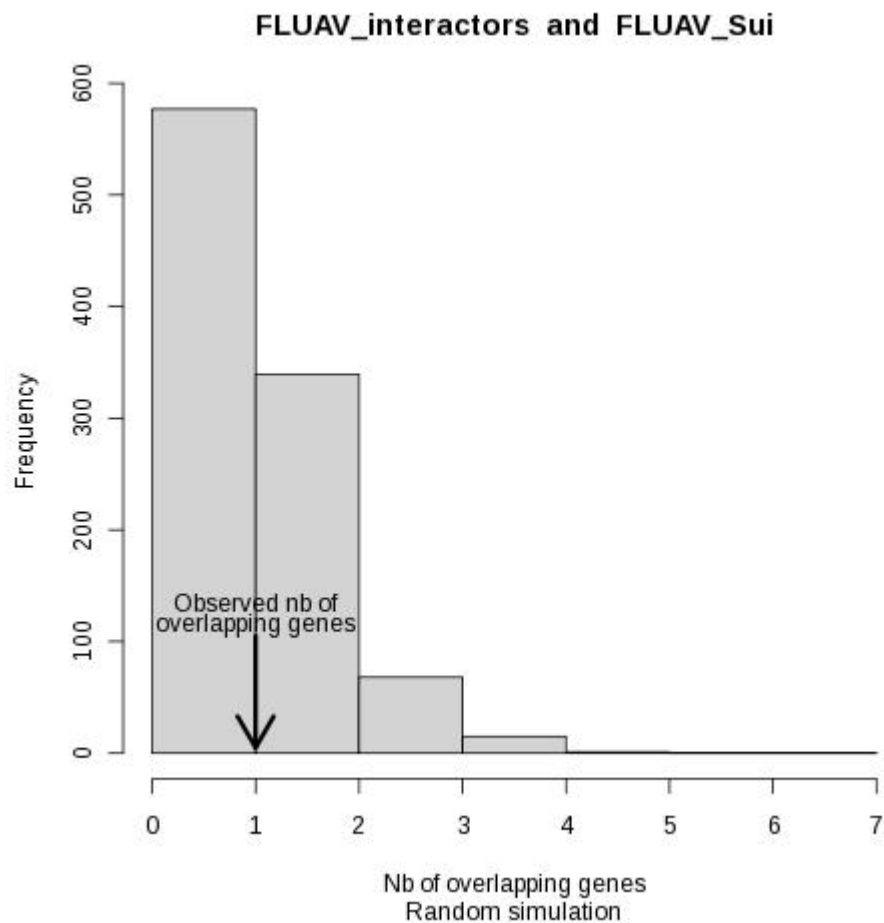

### 84. *FLUAV\_interactors* vs. *FLUAV\_Karlas*

*FLUAV\_interactors*: 25157 genes tested, 145 genes identified

*FLUAV\_Karlas*: 22843 genes tested, 168 genes identified

Number of overlapping genes: 3

List of overlapping genes: XPO1, ISG15, NXF1

Number of simulations showing 3 or more overlapping genes: 80/1000

P-value: 0,080

Random distribution:

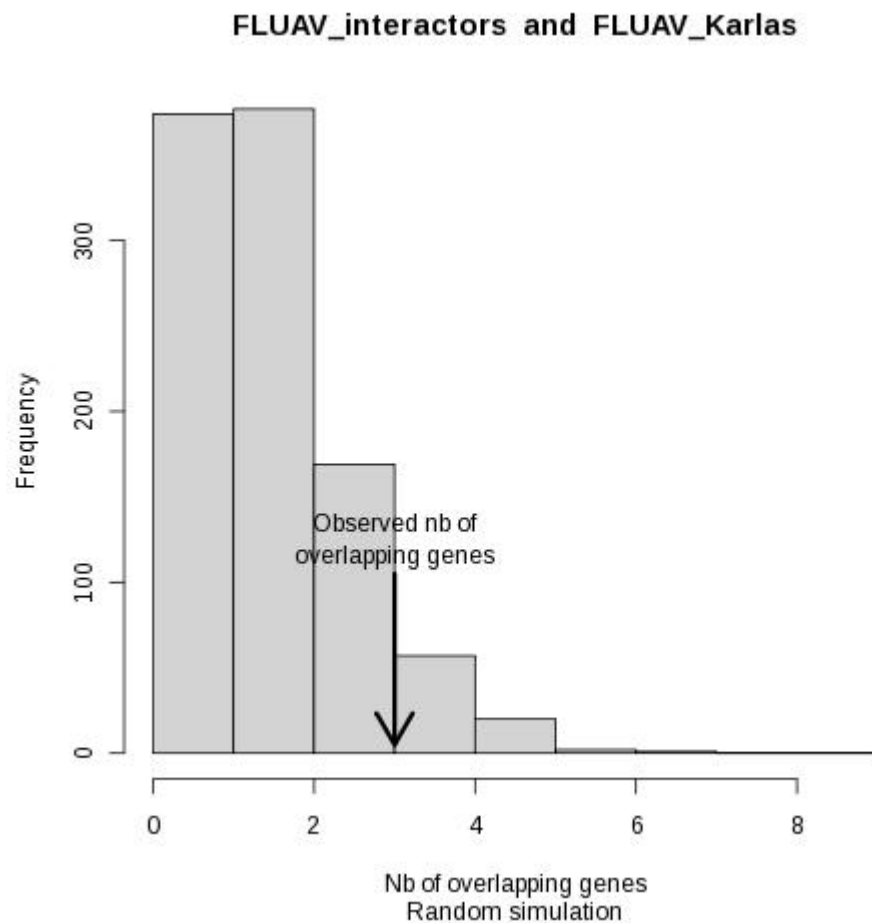

### 85. FLUAV\_interactors vs. HIV\_Brass

FLUAV\_interactors: 25157 genes tested, 145 genes identified  
HIV\_Brass: 21121 genes tested, 280 genes identified  
Number of overlapping genes: 4  
List of overlapping genes: HNRNPF, STX5, HTATSF1, LNX2  
Number of simulations showing 4 or more overlapping genes: 77/1000  
P-value: 0,077  
Random distribution:

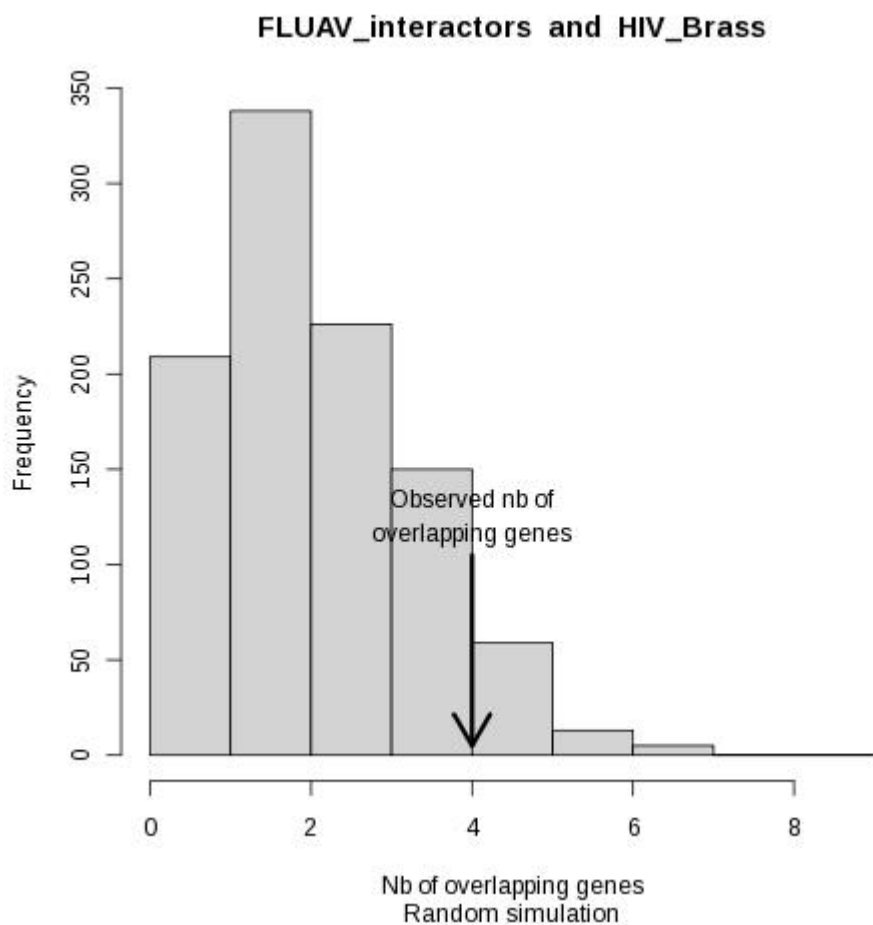

### 86. FLUAV\_interactors vs. HIV\_Konig

FLUAV\_interactors: 25157 genes tested, 145 genes identified  
HIV\_Konig: 19628 genes tested, 295 genes identified  
Number of overlapping genes: 5  
List of overlapping genes: CRYAB, DNMT2, POLR2A, NXF1, CALCOCO1  
Number of simulations showing 5 or more overlapping genes: 32/1000  
P-value: 0,032  
Random distribution:

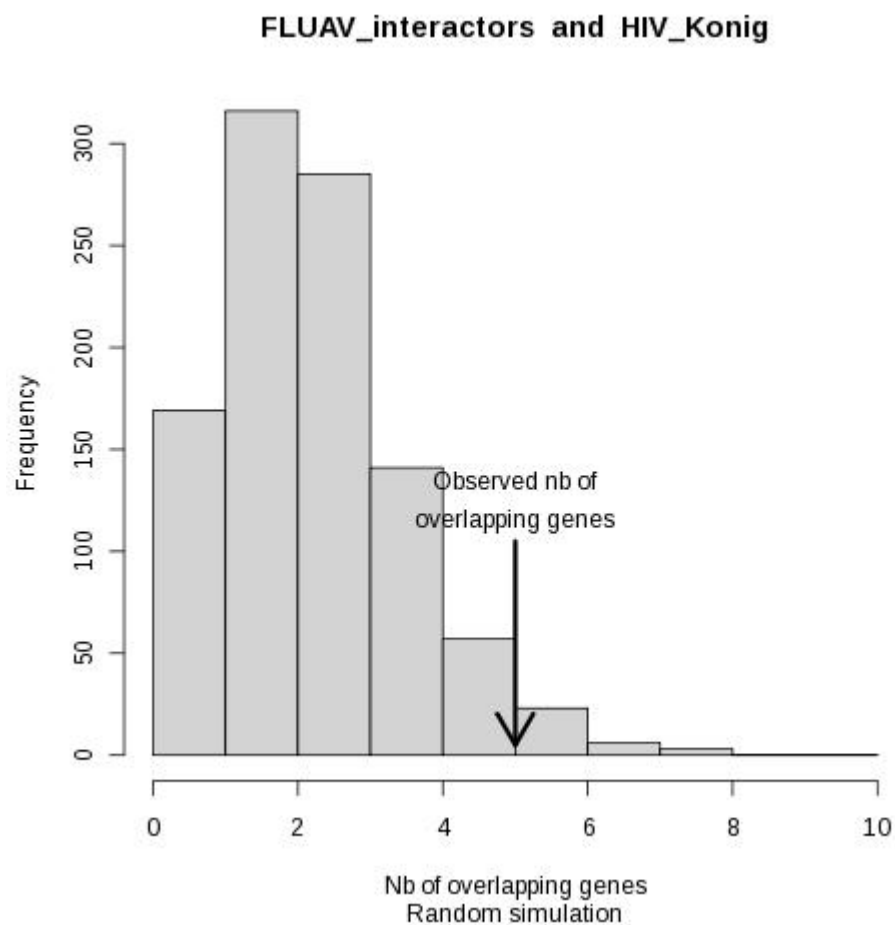

### 87. FLUAV\_interactors vs. WNV\_Krishnan

FLUAV\_interactors: 25157 genes tested, 145 genes identified  
WNV\_Krishnan: 21121 genes tested, 305 genes identified  
Number of overlapping genes: 5  
List of overlapping genes: ABLIM1, SP100, UBE2I, RBPMS, GMCL1  
Number of simulations showing 5 or more overlapping genes: 29/1000  
P-value: 0,029  
Random distribution:

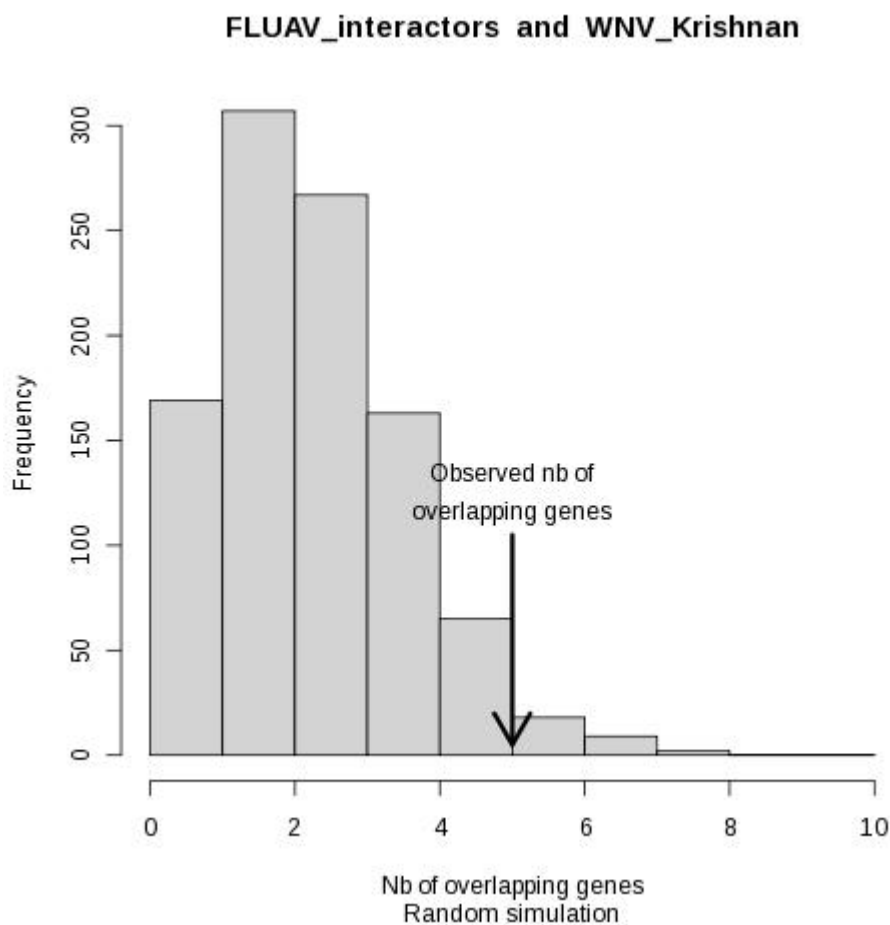

### 88. FLUAV\_interactors vs. HCV\_Li

FLUAV\_interactors: 25157 genes tested, 145 genes identified  
HCV\_Li: 19470 genes tested, 262 genes identified  
Number of overlapping genes: 4  
List of overlapping genes: MCM2, PPIA, GNB2L1, ZNF346  
Number of simulations showing 4 or more overlapping genes: 73/1000  
P-value: 0,073  
Random distribution:

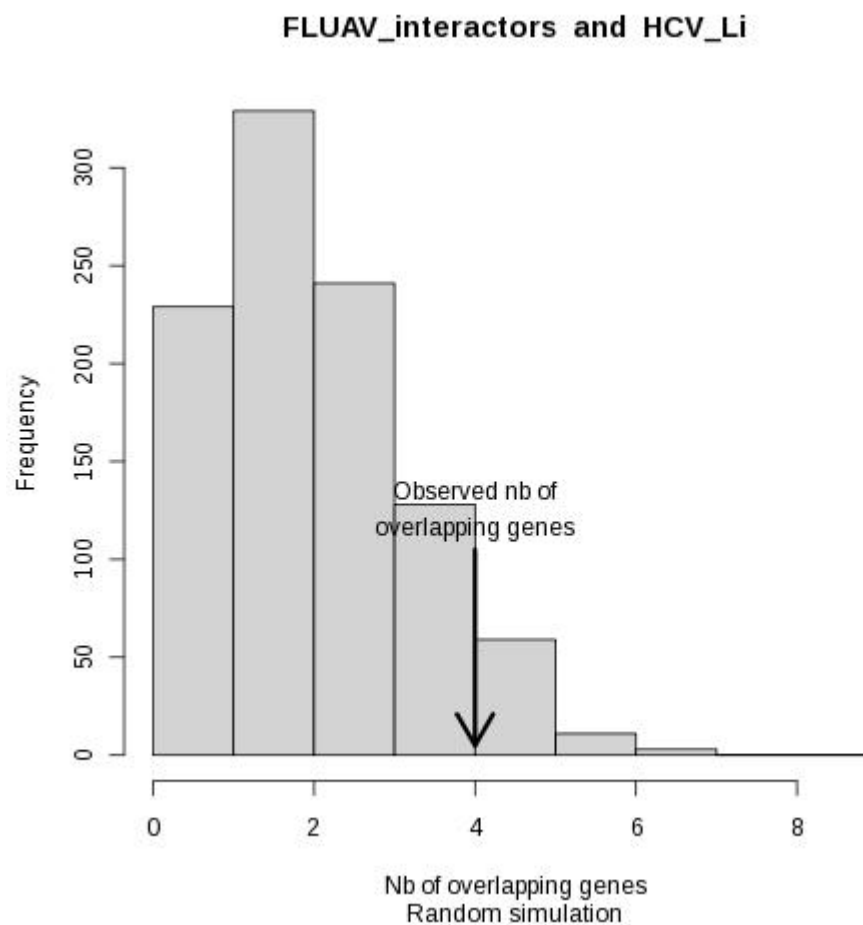



### 89. FLUAV\_interactors vs. DV\_Sessions

FLUAV\_interactors: 25157 genes tested, 145 genes identified  
DV\_Sessions: 10278 genes tested, 81 genes identified  
Number of overlapping genes: 0  
List of overlapping genes: none  
Number of simulations showing 0 or more overlapping genes: 1000/1000  
P-value: 1  
Random distribution:

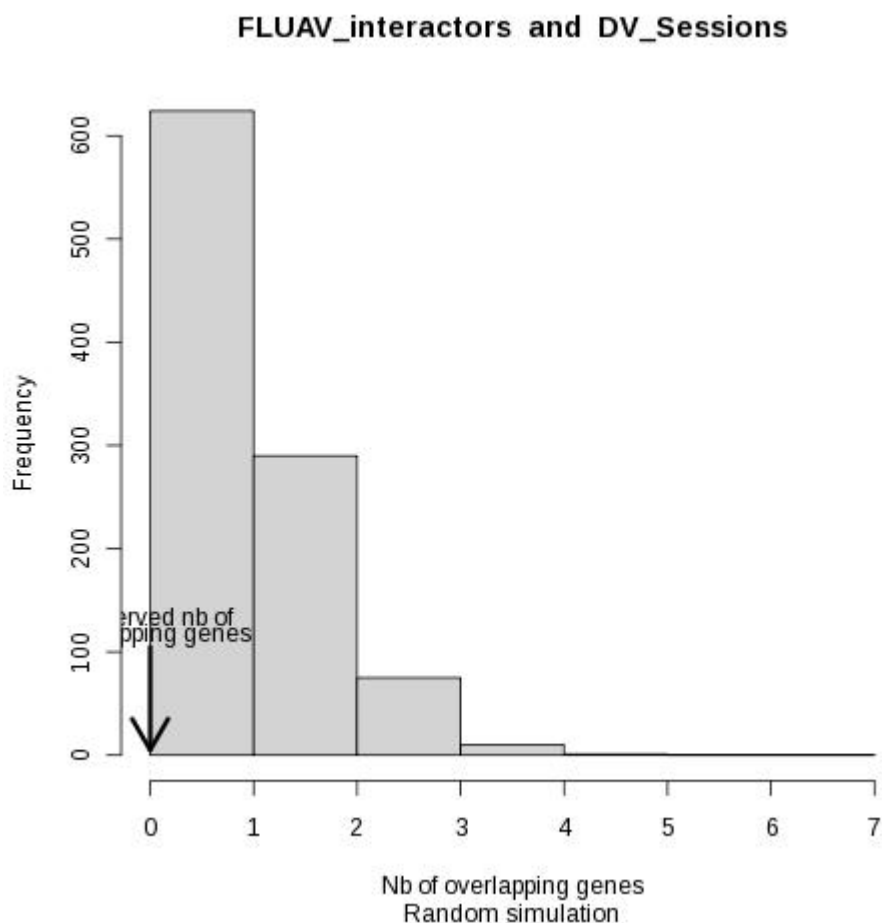

### 90. FLUAV\_interactors vs. HCV\_Tai

FLUAV\_interactors: 25157 genes tested, 145 genes identified  
HCV\_Tai: 21094 genes tested, 95 genes identified  
Number of overlapping genes: 1  
List of overlapping genes: CDC42  
Number of simulations showing 1 or more overlapping genes: 421/1000  
P-value: 0,421  
Random distribution:

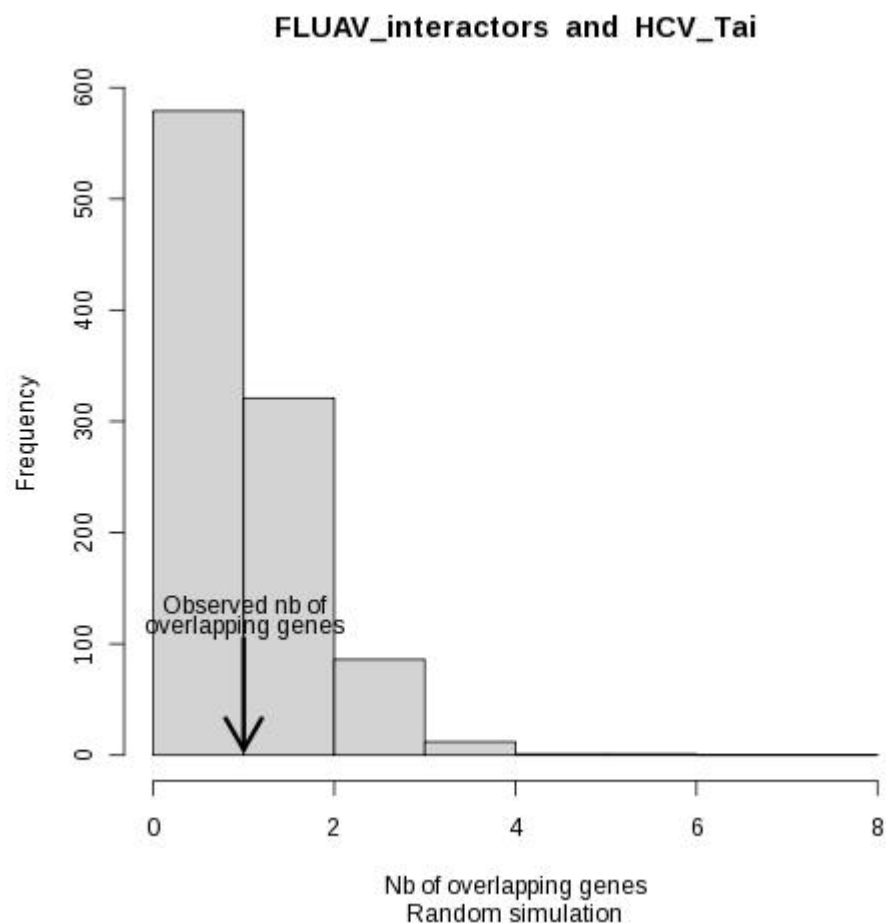

## 91. FLUAV\_interactors vs. HIV\_Zhou

FLUAV\_interactors: 25157 genes tested, 145 genes identified

HIV\_Zhou: 20000 genes tested, 206 genes identified

Number of overlapping genes: 2

List of overlapping genes: GABPB1, XPO1

Number of simulations showing 2 or more overlapping genes: 329/1000

P-value: 0,329

Random distribution:

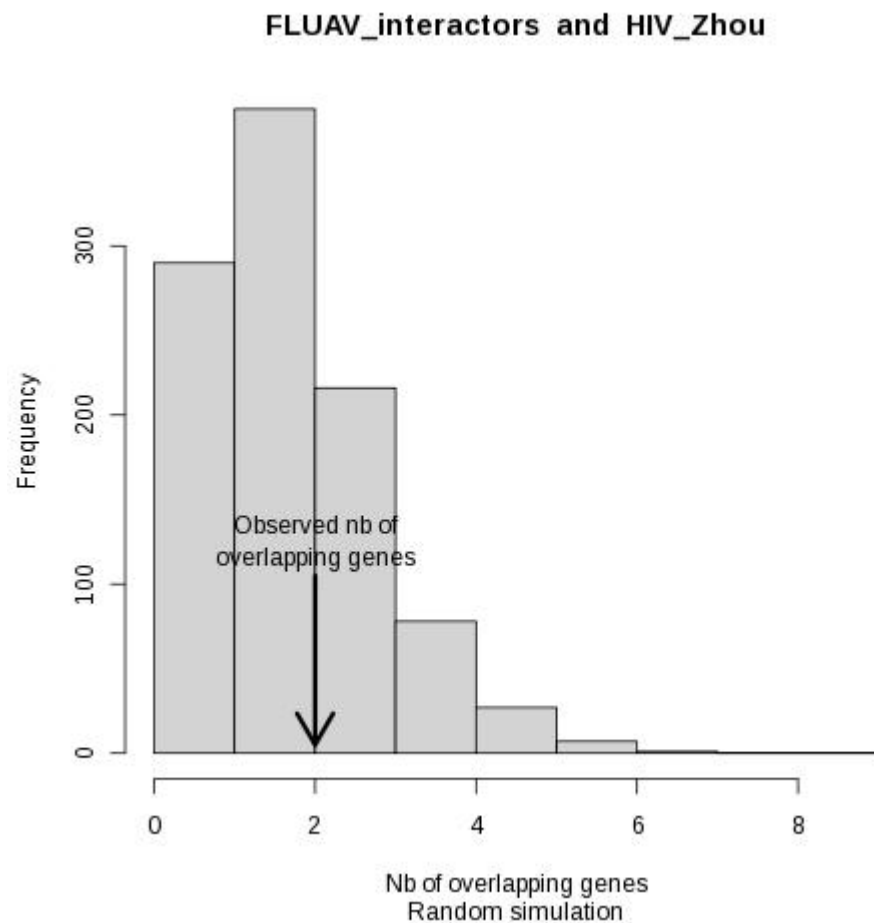

## 92. FLUAV\_interactors vs. FLUAV\_all\_screens

FLUAV\_interactors: 25157 genes tested, 145 genes identified

FLUAV\_all\_screens: 25157 genes tested, 925 genes identified

Number of overlapping genes: 17

List of overlapping genes: HLA-B, HSPA8, HSP90AA1, PIK3R2, EIF2AK2, TRIM27, STX5, SUMO1, XPO1, ISG15, NXF1, DDX58, TTC12, ZMAT4, USHBP1, LZTS2, PTPMT1

Number of simulations showing 17 or more overlapping genes: 0/1000

P-value: < 0,001

Random distribution:

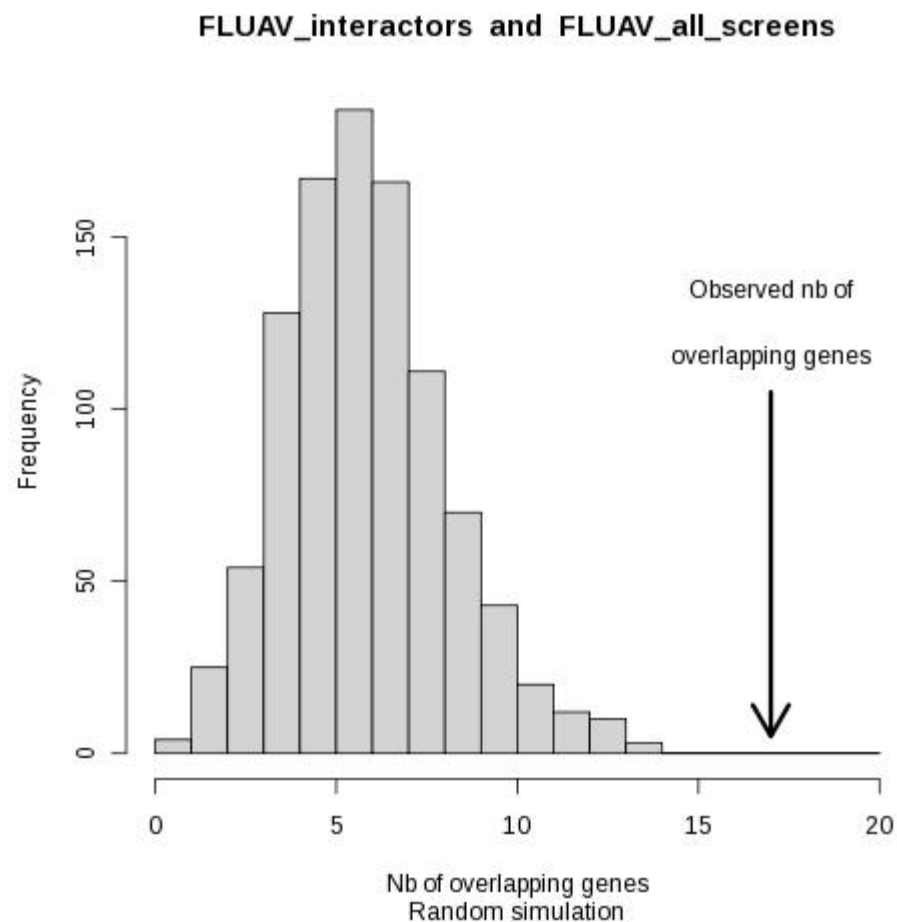

### 93. FLUAV\_interactors vs. HIV\_all\_screens

FLUAV\_interactors: 25157 genes tested, 145 genes identified

HIV\_all\_screens: 25157 genes tested, 719 genes identified

Number of overlapping genes: 11

List of overlapping genes: CRYAB, DNM2, GABPB1, HNRNPF, POLR2A, STX5, XPO1, NXF1, HTATSF1, CALCOCO1, LNX2

Number of simulations showing 11 or more overlapping genes: 4/1000

P-value: 0,004

Random distribution:

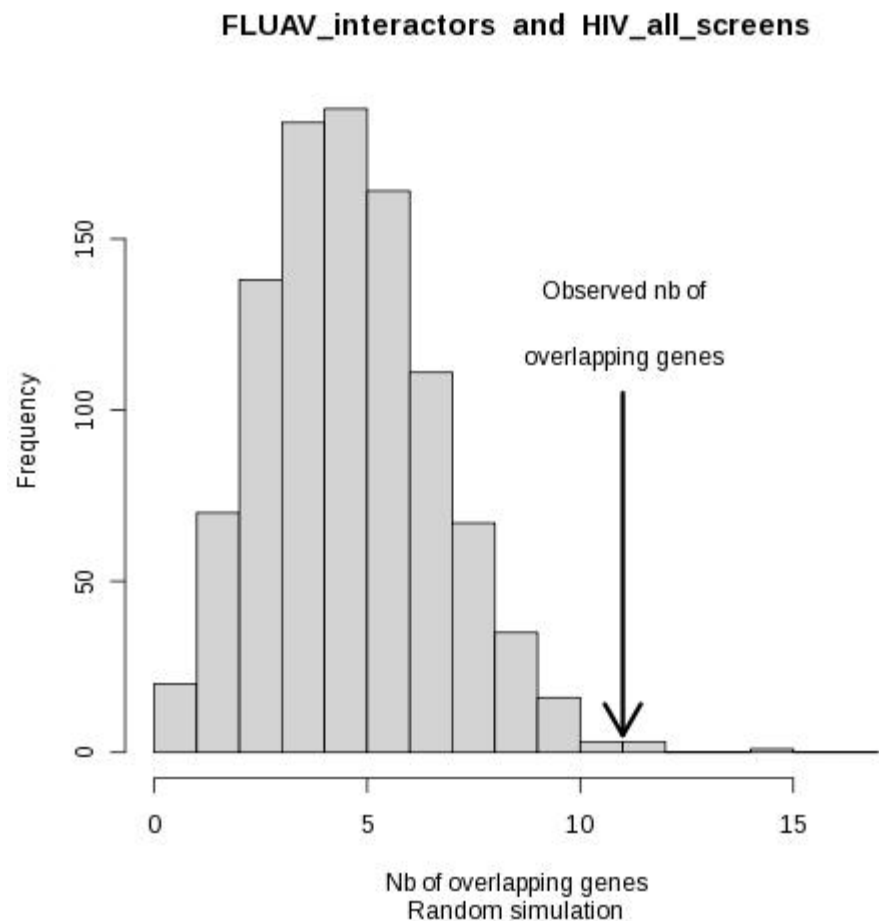

### 94. FLUAV\_interactors vs. HCV\_all\_screens

FLUAV\_interactors: 25157 genes tested, 145 genes identified

HCV\_all\_screens: 25157 genes tested, 344 genes identified

Number of overlapping genes: 5

List of overlapping genes: CDC42, MCM2, PPIA, GNB2L1, ZNF346

Number of simulations showing 5 or more overlapping genes: 43/1000

P-value: 0,043

Random distribution:

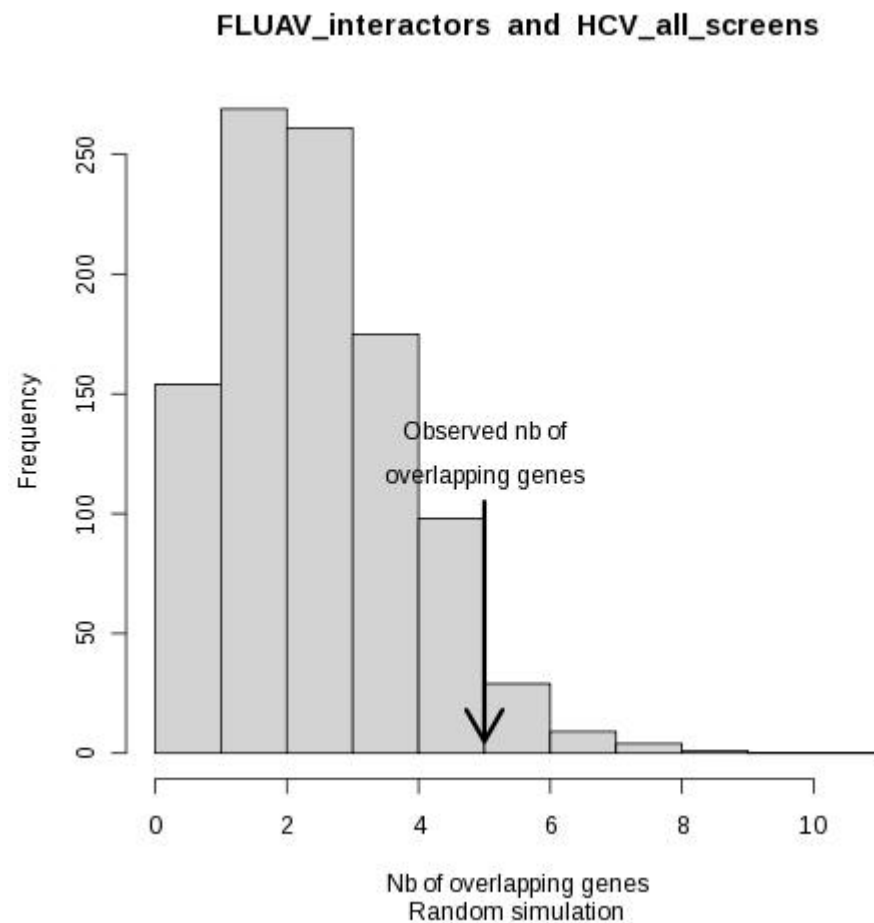

### 95. FLUAV\_interactors vs. WNV\_all\_screens

FLUAV\_interactors: 25157 genes tested, 145 genes identified  
WNV\_all\_screens: 21121 genes tested, 291 genes identified  
Number of overlapping genes: 5  
List of overlapping genes: ABLIM1, SP100, UBE2I, RBPMS, GMCL1  
Number of simulations showing 5 or more overlapping genes: 25/1000  
P-value: 0,025  
Random distribution:

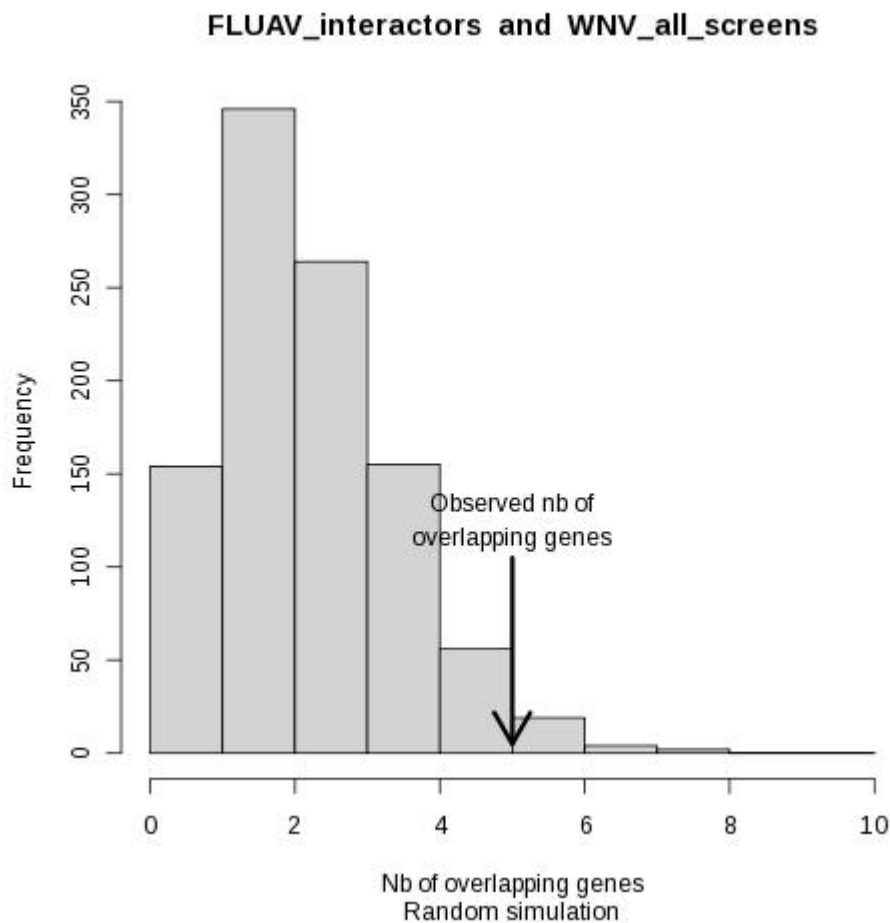

### 96. FLUAV\_interactors vs. DV\_all\_screens

FLUAV\_interactors: 25157 genes tested, 145 genes identified  
DV\_all\_screens: 10278 genes tested, 80 genes identified  
Number of overlapping genes: 0  
List of overlapping genes: none  
Number of simulations showing 0 or more overlapping genes: 1000/1000  
P-value: 1  
Random distribution:

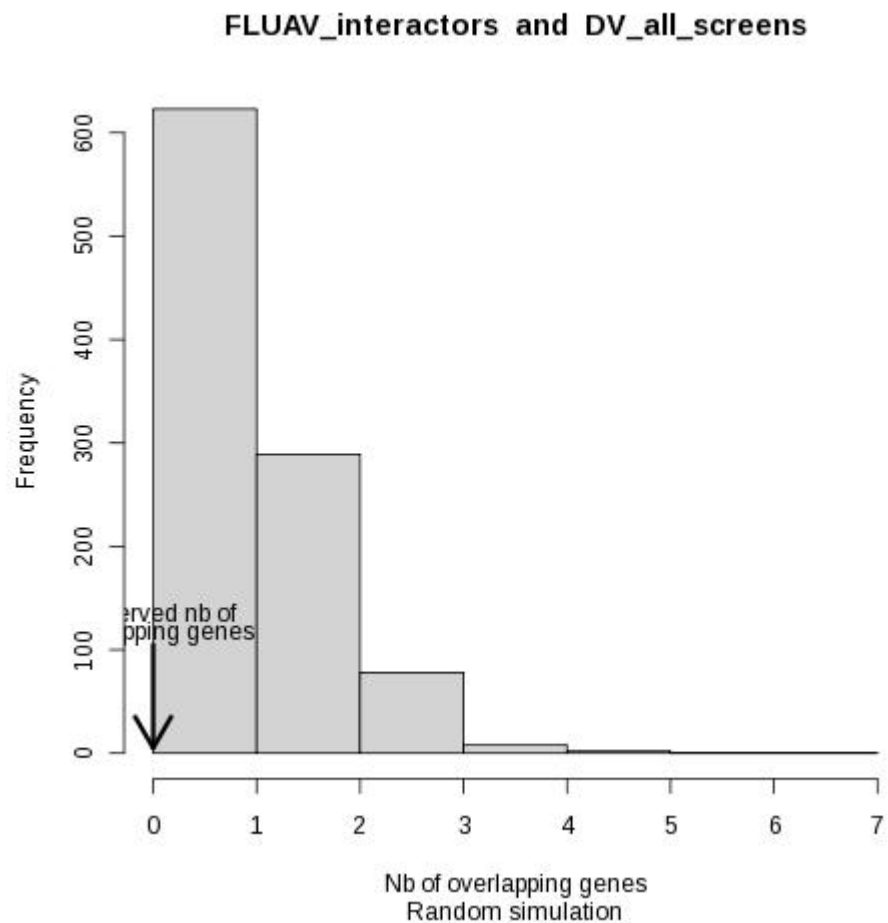

Supplement: c2mb05416g_2.pdf [file c2mb05416g_2.pdf]
